# Supplementary material
Source: PubMed Central journal article supplement (PMC4210125)

# Ligand-enabled $\gamma$ -C–H Olefination and Carbonylation: Construction of $\beta$ -Quaternary Carbon Centers

Suhua Li, Gang Chen, Chen-Guo Feng, Wei Gong and Jin-Quan Yu

Department of Chemistry, The Scripps Research Institute, 10550 North Torrey Pines Road, La Jolla, California 92037

## Table of Contents

|                                                                                 |         |
|---------------------------------------------------------------------------------|---------|
| <b>1. General Information</b>                                                   | S2      |
| <b>2. Experimental Section</b>                                                  | S3–S29  |
| 2.1 Synthesis of Starting Materials                                             | S3–S8   |
| 2.2 Synthesis of Quinoline Ligands                                              | S8–S11  |
| 2.3 Optimization of Reaction Conditions                                         | S12–S17 |
| 2.4 General Procedure for Olefination of Amides                                 | S18–S26 |
| 2.5 Procedure for Cleavage of Auxiliary                                         | S26–27  |
| 2.6 Procedure for Construction of poly-functionalized Quaternary Carbon Centers | S27–S29 |
| <b>3. References</b>                                                            | S30     |
| <b>4. NMR Spectra of New Compounds</b>                                          | S31–S70 |

**General Information:** Octafluorotoluene was obtained from Oakwood Chemical. Other solvents and chemicals were from Sigma-Aldrich, Acros and Alfa Aesar and used directly without further purification. Analytical thin layer chromatography was performed on 0.25 mm silica gel 60-F254. Visualization was carried out with UV light and Vogel's permanganate. Preparative TLC was performed on 1.0 mm silica gel (Analtech). Columns for flash chromatography (FC) contained silica gel (32–63 $\mu$ , Dynamic Adsorbents, Inc.).  $^1\text{H}$  NMR spectra were recorded on Bruker AV-400 instrument (400 MHz) or Varian Inova 400 (400 MHz), Bruker DRX-600 instrument (600 MHz). Chemical shifts were quoted in parts per million (ppm) referenced to 0.0 ppm for tetramethylsilane. The following abbreviations (or combinations thereof) were used to explain multiplicities: s = singlet, d = doublet, t = triplet, q = quartet, quint = quintet, sext = sextet, m = multiplet, br = broad. Coupling constants,  $J$ , were reported in Hertz unit (Hz).  $^{13}\text{C}$  NMR spectra were recorded on Bruker DRX-600 instrument (150 MHz), and were fully decoupled by broad band proton decoupling. Chemical shifts were reported in ppm referenced to the center line of a triplet at 77.0 ppm of chloroform- $d$ . In the  $^{13}\text{C}$  NMR analysis, peaks that correspond to those of the polyfluoroarylamide auxiliary appeared as nearly invisible, complex sets of multiplets; they are omitted in the following spectroscopic analysis. High-resolution mass spectra (HRMS) were recorded on an Agilent Mass spectrometer using ESI-TOF (electrospray ionization-time of flight).

## Experimental Section

### 2.1 Synthesis of Starting Materials

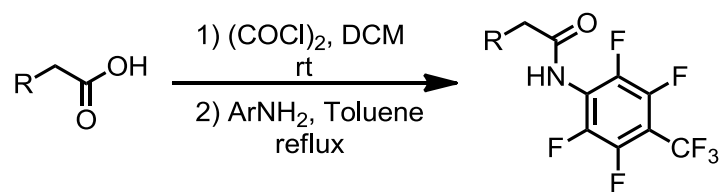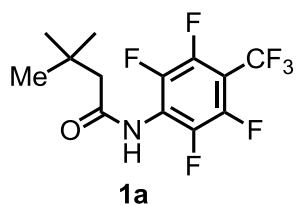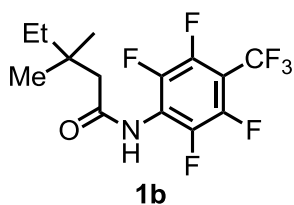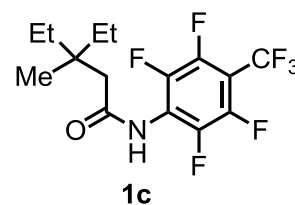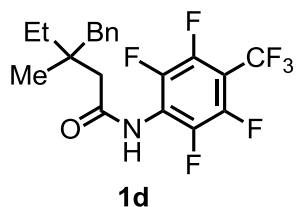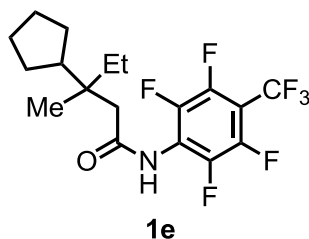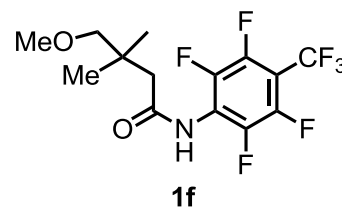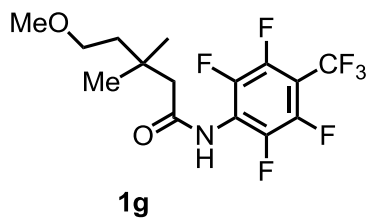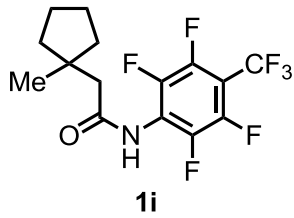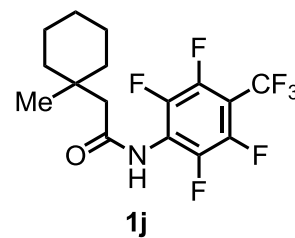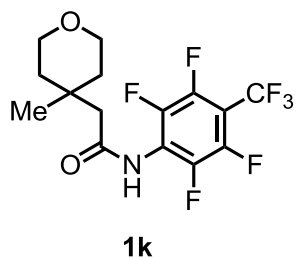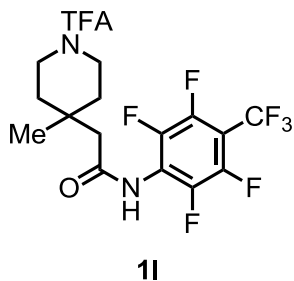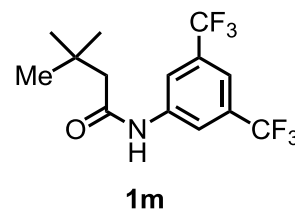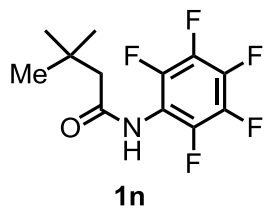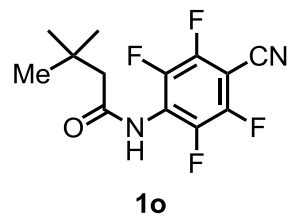

### General Procedure for the Preparation of Amide Substrates:

An acid chloride (10 mmol), prepared from the corresponding carboxylic acid and oxalyl chloride, was added to a solution of 2,3,5,6-tetrafluoro-4-(trifluoromethyl)aniline (10 mmol) in toluene (10 mL). The reaction mixture was stirred for 12 h under reflux. After cooling to room temperature, the product mixture was concentrated in vacuum and was recrystallized from ethyl acetate/hexane to give the amide.

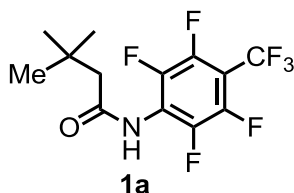

### 3,3-dimethyl-N-(2,3,5,6-tetrafluoro-4-(trifluoromethyl)phenyl)butanamide

$^1\text{H}$  NMR (400 MHz,  $\text{CDCl}_3$ )  $\delta$  6.83 (br s, 1 H), 2.35 (s, 2 H), 1.13 (s, 9 H);  $^{13}\text{C}$  NMR (150 MHz,  $\text{CDCl}_3$ )  $\delta$  169.3, 50.1, 31.3, 29.6; HRMS (ESI-TOF) Calcd for  $\text{C}_{13}\text{H}_{13}\text{F}_7\text{NO}$  [M-H] $^-$ : 330.0729; found: 330.0740.

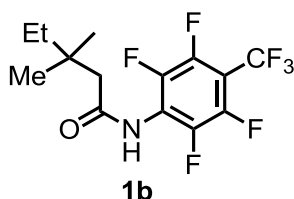

### 3,3-dimethyl-N-(2,3,5,6-tetrafluoro-4-(trifluoromethyl)phenyl)pentanamide

$^1\text{H}$  NMR (400 MHz,  $\text{CDCl}_3$ )  $\delta$  6.91 (br s, 1 H), 2.33 (s, 2 H), 1.44 (q,  $J = 7.6$  Hz, 2 H), 1.07 (s, 6 H), 0.91 (t,  $J = 7.4$  Hz, 3 H);  $^{13}\text{C}$  NMR (150 MHz,  $\text{CDCl}_3$ )  $\delta$  169.8, 47.8, 34.8, 33.9, 26.5, 8.4; HRMS (ESI-TOF) Calcd for  $\text{C}_{14}\text{H}_{15}\text{F}_7\text{NO}$  [M+H] $^+$ : 346.1042; found: 346.1037.

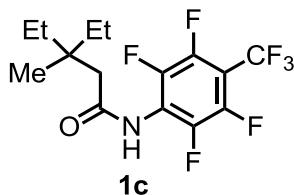

### 3-ethyl-3-methyl-N-(2,3,5,6-tetrafluoro-4-(trifluoromethyl)phenyl)pentanamide

$^1\text{H}$  NMR (400 MHz,  $\text{CDCl}_3$ )  $\delta$  6.91 (br s, 1 H), 2.33 (s, 2 H), 1.44 (q,  $J = 7.5$  Hz, 4 H), 1.03 (s, 3 H), 0.88 (t,  $J = 7.4$  Hz, 6 H);  $^{13}\text{C}$  NMR (150 MHz,  $\text{CDCl}_3$ )  $\delta$  169.4, 45.4, 36.6, 31.1, 24.0, 8.1; HRMS (ESI-TOF) Calcd for  $\text{C}_{15}\text{H}_{17}\text{F}_7\text{NO}$   $[\text{M}+\text{H}]^+$ : 360.1198; found: 360.1189.

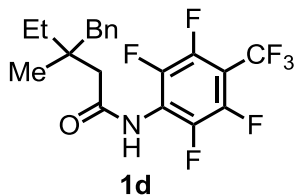

**3-benzyl-3-methyl-N-(2,3,5,6-tetrafluoro-4-(trifluoromethyl)phenyl)pentanamide**

$^1\text{H}$  NMR (400 MHz,  $\text{CDCl}_3$ )  $\delta$  7.35-7.15 (m, 5 H), 7.01 (br s, 1 H), 2.79 (d,  $J = 13.2$  Hz, 1 H), 2.70 (d,  $J = 13.2$  Hz, 1 H), 2.32 (d,  $J = 14.4$  Hz, 1 H), 2.25 (d,  $J = 14.4$  Hz, 1 H), 1.58-1.41 (m, 2 H), 1.04 (s, 3 H), 0.98 (t,  $J = 7.4$  Hz, 3 H);  $^{13}\text{C}$  NMR (150 MHz,  $\text{CDCl}_3$ )  $\delta$  169.5, 138.1, 130.7, 128.0, 126.2, 44.9, 44.3, 37.6, 31.7, 24.2, 8.4; HRMS (ESI-TOF) Calcd for  $\text{C}_{20}\text{H}_{19}\text{F}_7\text{NO}$   $[\text{M}+\text{H}]^+$ : 422.1355; found: 422.1351.

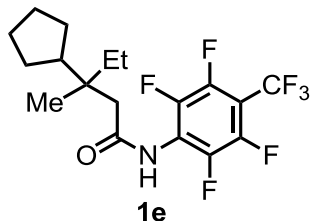

**3-cyclopentyl-3-methyl-N-(2,3,5,6-tetrafluoro-4-(trifluoromethyl)phenyl)pentanamide**

$^1\text{H}$  NMR (400 MHz,  $\text{CDCl}_3$ )  $\delta$  6.92 (br s, 1 H), 2.38 (s, 2 H), 2.09-1.97 (m, 1 H), 1.70-1.49 (m, 9 H), 1.40-1.25 (m, 2 H), 1.03 (s, 3 H), 0.95 (t,  $J = 7.4$  Hz, 3 H);  $^{13}\text{C}$  NMR (150 MHz,  $\text{CDCl}_3$ )  $\delta$  169.6, 47.1, 44.0, 38.4, 30.4, 26.8, 26.5, 25.7, 21.2, 8.3; HRMS (ESI-TOF) Calcd for  $\text{C}_{18}\text{H}_{21}\text{F}_7\text{NO}$   $[\text{M}+\text{H}]^+$ : 400.1511; found: 400.1500.

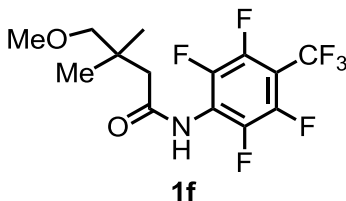

**4-methoxy-3,3-dimethyl-N-(2,3,5,6-tetrafluoro-4-(trifluoromethyl)phenyl)butanamide**

$^1\text{H}$  NMR (400 MHz,  $\text{CDCl}_3$ )  $\delta$  8.46 (br s, 1 H), 3.46 (s, 3 H), 3.28 (s, 2 H), 2.49 (s, 2 H), 1.07 (s, 6 H);  $^{13}\text{C}$  NMR (150 MHz,  $\text{CDCl}_3$ )  $\delta$  169.3, 81.2, 59.3, 46.4, 34.8, 25.7; HRMS (ESI-TOF) Calcd for  $\text{C}_{14}\text{H}_{15}\text{F}_7\text{NO}_2$   $[\text{M}+\text{H}]^+$ : 362.0991; found: 362.0991.

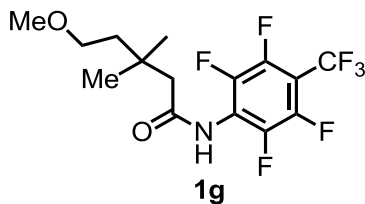

**5-methoxy-3,3-dimethyl-N-(2,3,5,6-tetrafluoro-4-(trifluoromethyl)phenyl)pentanamide**

$^1\text{H}$  NMR (400 MHz,  $\text{CDCl}_3$ )  $\delta$  9.50 (br s, 1 H), 3.65 (t,  $J = 5.0$  Hz, 2 H), 3.45 (s, 3 H), 2.48 (s, 2 H), 1.76 (t,  $J = 5.2$  Hz, 2 H), 1.09 (s, 6 H);  $^{13}\text{C}$  NMR (150 MHz,  $\text{CDCl}_3$ )  $\delta$  169.6, 70.2, 58.9, 47.7, 39.4, 33.0, 29.1; HRMS (ESI-TOF) Calcd for  $\text{C}_{15}\text{H}_{17}\text{F}_7\text{NO}$   $[\text{M}+\text{H}]^+$ : 376.1148; found: 376.1145.

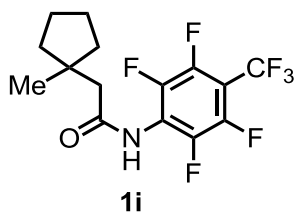

**2-(1-methylcyclopentyl)-N-(2,3,5,6-tetrafluoro-4-(trifluoromethyl)phenyl)acetamide**

$^1\text{H}$  NMR (400 MHz,  $\text{CDCl}_3$ )  $\delta$  6.93 (br s, 1 H), 2.46 (s, 2 H), 1.76-1.48 (m, 8 H), 1.15 (s, 3 H);  $^{13}\text{C}$  NMR (150 MHz,  $\text{CDCl}_3$ )  $\delta$  169.7, 48.1, 41.9, 39.5, 25.7, 23.9; HRMS (ESI-TOF) Calcd for  $\text{C}_{15}\text{H}_{15}\text{F}_7\text{NO}$   $[\text{M}+\text{H}]^+$ : 358.1042; found: 358.1039.

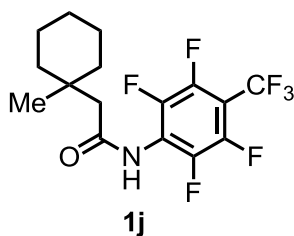

**2-(1-methylcyclohexyl)-N-(2,3,5,6-tetrafluoro-4-(trifluoromethyl)phenyl)acetamide**

$^1\text{H}$  NMR (400 MHz,  $\text{CDCl}_3$ )  $\delta$  6.95 (br s, 1 H), 2.37 (s, 2 H), 1.56-1.34 (m, 10 H), 1.11 (s, 3 H);  $^{13}\text{C}$  NMR (150 MHz,  $\text{CDCl}_3$ )  $\delta$  169.1, 48.6, 37.9, 33.9, 26.0, 25.1, 22.0; HRMS (ESI-TOF) Calcd for  $\text{C}_{16}\text{H}_{17}\text{F}_7\text{NO}$   $[\text{M}+\text{H}]^+$ : 372.1198; found: 372.1185.

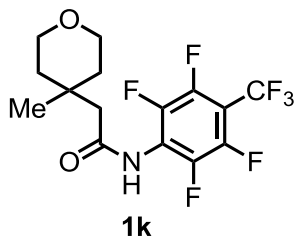

**2-(1-methylcyclohexyl)-N-(2,3,5,6-tetrafluoro-4-(trifluoromethyl)phenyl)acetamide**

$^1\text{H}$  NMR (400 MHz,  $\text{CDCl}_3$ )  $\delta$  7.03 (br s, 1 H), 3.81-3.64 (m, 4 H), 2.44 (s, 2 H), 1.76-1.66 (m, 2 H), 1.58-1.49 (m, 2 H), 1.24 (s, 3 H);  $^{13}\text{C}$  NMR (150 MHz,  $\text{CDCl}_3$ )  $\delta$  168.4, 63.7, 48.6, 37.6, 31.6, 23.7; HRMS (ESI-TOF) Calcd for  $\text{C}_{15}\text{H}_{15}\text{F}_7\text{NO}$   $[\text{M}+\text{H}]^+$ : 374.0991; found: 374.0991.

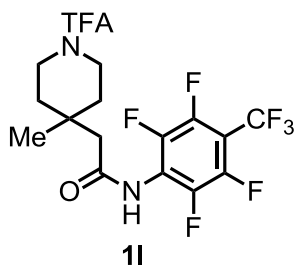

**2-(4-methyl-1-(2,2,2-trifluoroacetyl)piperidin-4-yl)-N-(2,3,5,6-tetrafluoro-4-(trifluoromethyl)phenyl)acetamide**

$^1\text{H}$  NMR (400 MHz,  $\text{CDCl}_3$ )  $\delta$  7.48 (br s, 1 H), 4.02-3.92 (m, 1 H), 3.80-3.68 (m, 1 H), 3.56-3.37 (m, 2 H), 2.48 (d,  $J = 13.6$  Hz, 1 H), 2.43 (d,  $J = 13.6$  Hz, 1 H), 1.78-1.60 (m, 4 H), 1.27 (s, 3 H);  $^{13}\text{C}$  NMR (150 MHz,  $\text{CDCl}_3$ )  $\delta$  168.1, 155.5 (q,  $J = 35.6$  Hz), 116.5 (q,  $J = 286.1$  Hz), 47.6, 42.1 (q,  $J = 3.3$  Hz), 39.8, 37.1, 36.5, 32.5, 23.2; HRMS (ESI-TOF) Calcd for  $\text{C}_{17}\text{H}_{15}\text{F}_{10}\text{N}_2\text{O}_2$   $[\text{M}+\text{H}]^+$ : 469.0974; found: 469.0968.

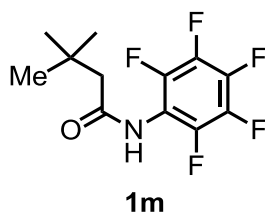

**3,3-dimethyl-N-(perfluorophenyl)butanamide**

$^1\text{H}$  NMR (400 MHz,  $\text{CDCl}_3$ )  $\delta$  6.70 (br s, 1 H), 2.31 (s, 2 H), 1.12 (s, 9 H);  $^{13}\text{C}$  NMR (150 MHz,  $\text{CDCl}_3$ )  $\delta$  169.8, 50.1, 31.2, 29.7; HRMS (ESI-TOF) Calcd for  $\text{C}_{12}\text{H}_{13}\text{F}_5\text{NO}$   $[\text{M}+\text{H}]^+$ : 282.0917; found: 282.0910.

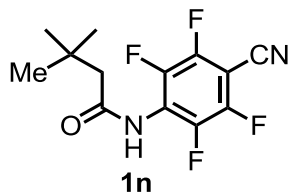

### *N*-(4-cyano-2,3,5,6-tetrafluorophenyl)-3,3-dimethylbutanamide

$^1\text{H}$  NMR (400 MHz,  $\text{CDCl}_3$ )  $\delta$  7.01 (br s, 1 H), 2.35 (s, 2 H), 1.12 (s, 9 H);  $^{13}\text{C}$  NMR (150 MHz,  $\text{CDCl}_3$ )  $\delta$  169.4, 147.4 (ddt,  $J_1 = 259.8$  Hz,  $J_2 = 15.0$  Hz,  $J_3 = 4.4$  Hz), 141.7 (ddt,  $J_1 = 251.6$  Hz,  $J_2 = 12.6$  Hz,  $J_3 = 4.3$  Hz), 122.7 (t,  $J = 14.2$  Hz), 107.3 (t,  $J = 3.4$  Hz), 91.1 (t,  $J = 2.2$  Hz), 50.0, 31.3, 29.6; HRMS (ESI-TOF) Calcd for  $\text{C}_{13}\text{H}_{13}\text{F}_4\text{N}_2\text{O}$   $[\text{M}+\text{H}]^+$ : 289.0964; found: 289.0969.

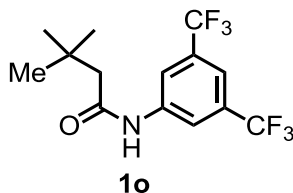

### *N*-(3,5-bis(trifluoromethyl)phenyl)-3,3-dimethylbutanamide

$^1\text{H}$  NMR (400 MHz,  $\text{CDCl}_3$ )  $\delta$  8.03 (s, 1 H), 7.59 (s, 1 H), 7.44 (s, 1 H), 2.27 (s, 2 H), 1.12 (s, 9 H);  $^{13}\text{C}$  NMR (150 MHz,  $\text{CDCl}_3$ )  $\delta$  170.5, 139.2, 132.3 (q,  $J = 33.3$  Hz), 123.0 (q,  $J = 271.1$  Hz), 119.4, 117.5 (quint,  $J = 3.8$  Hz), 51.5, 31.4, 29.7; HRMS (ESI-TOF) Calcd for  $\text{C}_{14}\text{H}_{16}\text{F}_6\text{NO}$   $[\text{M}+\text{H}]^+$ : 328.1136; found: 328.1132.

## 2.2 Synthesis of Quinoline Ligands

The ligand **L2**, **L7** ~ **15** were prepared according to the literature with small modifications.

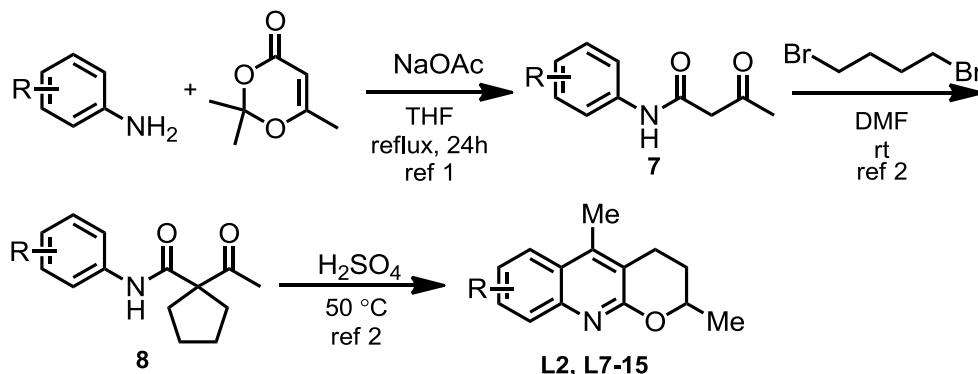



### 1. Synthesis of **7**<sup>1</sup>

A mixture of aniline (30 mmol), dioxinone (42 mmol), and NaOAc (30 mmol) in THF (6 mL) were heated under reflux for 24 h. After cooled to room temperature, the mixture was diluted with AcOEt, washed with H<sub>2</sub>O and brine. The organic phase was dried with anhydrous Na<sub>2</sub>SO<sub>4</sub>, concentrated under reduced pressure, and purified by flash column chromatography (silica gel, hexane/EtOAc 5/1 to 2/1).

### 2. Synthesis of **8**<sup>2</sup>

To a 250 mL of round bottle flask were added **7** (20 mmol) and K<sub>2</sub>CO<sub>3</sub> (46 mmol) and DMF (50 mL). After stirring for 1 h, 1,4-dibromobutane (22 mmol) was added. The reaction was stirred for additional 12 h (monitored by TLC) before it was poured into water (150 mL). The mixture was extracted with EtOAc (40 mL × 3). The combined organic layers was washed with HCl (3 M, 40 mL × 2) and brine, dried with Na<sub>2</sub>SO<sub>4</sub>, filtrated and concentrated under vacuum affording the crude product which could be used without further purification.

### 3. Synthesis of **L2, L7-15**<sup>2</sup>

To a 100 mL of round bottle were added **8** (~ 20 mmol) and 15 mL of H<sub>2</sub>SO<sub>4</sub>. The mixture was stirred at 50 °C until full conversion of **8** (about 1.5 hours). The reaction mixture was carefully poured into ammonia/ice (ammonia: 28%, 50 mL; ice: ~ 100 mL). The mixture was extracted with EtOAc (60 mL × 3). The combined organic layers was washed with brine, dried with MgSO<sub>4</sub>, filtrated and concentrated affording the crude product which was purified by flash column chromatography (silica gel, hexane/EtOAc 4/1 to 1/1).

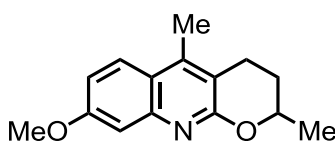

**L9**

#### **8-methoxy-2,5-dimethyl-3,4-dihydro-2H-pyrano[2,3-b]quinoline (L9)**

<sup>1</sup>H NMR (600 MHz, CDCl<sub>3</sub>) δ 7.74 (d, *J* = 9.6 Hz, 1 H), 7.18 (d, *J* = 2.4 Hz, 1 H), 7.00 (dd, *J*<sub>1</sub> = 9.0 Hz, *J*<sub>2</sub> = 2.4 Hz, 1 H), 4.38-4.31 (m, 1 H), 3.89 (s, 3 H), 2.93 (ddd, *J*<sub>1</sub> = 16.4 Hz, *J*<sub>2</sub> = 3.9 Hz, *J*<sub>3</sub> = 2.6 Hz, 1 H), 2.85-2.76 (m, 1 H), 2.48 (s, 3 H), 2.15-2.08 (m, 1 H), 1.82-1.73 (m, 1 H), 1.50 (d, *J* = 6.6 Hz, 3 H); <sup>13</sup>C NMR (150 MHz, CDCl<sub>3</sub>) δ 160.4, 160.2, 147.4, 144.1, 124.4, 120.0, 116.0, 113.4, 106.5, 73.0, 55.3, 29.0, 23.2, 21.3, 13.9; HRMS (ESI-TOF) Calcd for C<sub>15</sub>H<sub>18</sub>NO<sub>2</sub> [M+H]<sup>+</sup>: 244.1338; found: 244.1340.

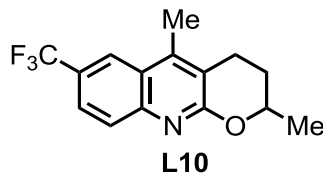

**2,5-dimethyl-7-(trifluoromethyl)-3,4-dihydro-2H-pyrano[2,3-*b*]quinolone (L10)**

$^1\text{H}$  NMR (400 MHz,  $\text{CDCl}_3$ )  $\delta$  8.18 (s, 1 H), 7.91 (d,  $J = 8.8$  Hz, 1 H), 7.74 (d,  $J = 8.8$  Hz, 1 H), 4.48-4.37 (m, 1 H), 3.08-2.82 (m, 2 H), 2.60 (s, 3 H), 2.23-2.13 (m, 1 H), 1.90-1.76 (m, 1 H), 1.54 (d,  $J = 6.4$  Hz, 3 H);  $^{13}\text{C}$  NMR (150 MHz,  $\text{CDCl}_3$ )  $\delta$  161.4, 147.2, 145.0, 128.9, 125.5 (q,  $J = 32.1$  Hz), 124.6 (q,  $J = 3.0$  Hz), 124.5 (q,  $J = 270.3$  Hz), 124.1, 121.3 (q,  $J = 4.4$  Hz), 117.7, 73.6, 28.7, 23.5, 21.3, 14.0; HRMS (ESI-TOF) Calcd for  $\text{C}_{15}\text{H}_{15}\text{F}_3\text{NO}$   $[\text{M}+\text{H}]^+$ : 282.1106; found: 282.1113.

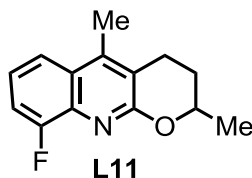

**9-fluoro-2,5-dimethyl-3,4-dihydro-2H-pyrano[2,3-*b*]quinolone (L11)**

$^1\text{H}$  NMR (400 MHz,  $\text{CDCl}_3$ )  $\delta$  7.69-7.62 (m, 1 H), 7.30-7.25 (m, 2 H), 4.45-4.35 (m, 1 H), 3.01 (ddd,  $J_1 = 16.9$  Hz,  $J_2 = 5.3$  Hz,  $J_3 = 2.9$  Hz, 1 H), 2.94-2.83 (m, 1 H), 2.56 (s, 3 H), 2.20-2.12 (m, 1 H), 1.88-1.76 (m, 1 H), 1.52 (d,  $J = 6.4$  Hz, 3 H);  $^{13}\text{C}$  NMR (150 MHz,  $\text{CDCl}_3$ )  $\delta$  160.1, 157.0 (d,  $J = 252.6$  Hz), 144.3 (d,  $J = 2.7$  Hz), 135.9 (d,  $J = 11.4$  Hz), 126.9 (d,  $J = 2.6$  Hz), 123.0 (d,  $J = 7.7$  Hz), 118.8 (d,  $J = 4.5$  Hz), 117.3, 112.9 (d,  $J = 18.5$  Hz), 73.3, 28.7, 23.6, 21.3, 14.2; HRMS (ESI-TOF) Calcd for  $\text{C}_{14}\text{H}_{15}\text{FNO}$   $[\text{M}+\text{H}]^+$ : 232.1138; found: 232.1140.

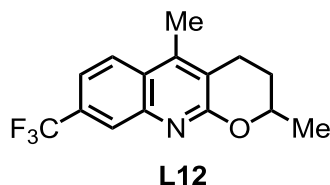

**2,5-dimethyl-8-(trifluoromethyl)-3,4-dihydro-2H-pyrano[2,3-*b*]quinolone (L12)**

$^1\text{H}$  NMR (400 MHz,  $\text{CDCl}_3$ )  $\delta$  8.09 (s, 1 H), 7.97 (d,  $J = 8.8$  Hz, 1 H), 7.53 (d,  $J = 8.8$  Hz, 1 H), 4.48-4.34 (m, 1 H), 3.10-2.80 (m, 2 H), 2.56 (s, 3 H), 2.24-2.10 (m, 1 H), 1.90-1.76 (m, 1 H), 1.53 (d,  $J = 6.4$  Hz, 3 H);  $^{13}\text{C}$  NMR (150 MHz,  $\text{CDCl}_3$ )  $\delta$  160.8, 144.9, 144.1, 130.5 (q,  $J = 32.3$  Hz), 126.7, 125.5 (q,  $J = 4.2$

Hz), 124.4, 124.1 (q,  $J = 270.6$  Hz), 119.3 (q,  $J = 2.9$  Hz), 118.5, 73.5, 28.6, 23.6, 21.3, 14.0; Calcd for  $C_{15}H_{15}F_3NO$   $[M+H]^+$ : 282.1106; found: 282.1105.

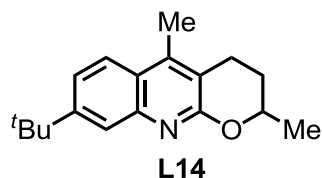

**8-(*tert*-butyl)-2,5-dimethyl-3,4-dihydro-2H-pyrano[2,3-*b*]quinolone (L14)**

$^1H$  NMR (400 MHz,  $CDCl_3$ )  $\delta$  7.83-7.77 (m, 2 H), 7.45 (dd,  $J_1 = 9.0$  Hz,  $J_2 = 1.8$  Hz, 1 H), 4.42-4.28 (m, 1 H), 2.96 (ddd,  $J_1 = 16.8$  Hz,  $J_2 = 5.6$  Hz,  $J_3 = 2.8$  Hz, 1 H), 2.90-2.78 (m, 1 H), 2.51 (s, 3 H), 2.16-2.07 (m, 1 H), 1.86-1.72 (m, 1 H), 1.50 (d,  $J = 6.0$  Hz, 3 H), 1.39 (s, 9 H);  $^{13}C$  NMR (150 MHz,  $CDCl_3$ )  $\delta$  160.0, 151.9, 145.7, 143.7, 123.5, 123.0, 122.7, 122.3, 115.3, 73.0, 34.8, 31.1, 29.0, 23.3, 21.3, 13.7; HRMS (ESI-TOF) Calcd for  $C_{18}H_{24}NO$   $[M+H]^+$ : 270.1858; found: 270.1861.

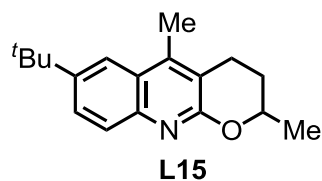

**7-(*tert*-butyl)-2,5-dimethyl-3,4-dihydro-2H-pyrano[2,3-*b*]quinoline (L15)**

$^1H$  NMR (400 MHz,  $CDCl_3$ )  $\delta$  7.80 (d,  $J = 2.4$  Hz, 1 H), 7.77 (d,  $J = 8.8$  Hz, 1 H), 7.66 (dd,  $J_1 = 9.0$  Hz,  $J_2 = 1.8$  Hz, 1 H), 4.41-4.31 (m, 1 H), 2.99 (ddd,  $J_1 = 16.8$  Hz,  $J_2 = 5.6$  Hz,  $J_3 = 2.8$  Hz, 1 H), 2.92-2.80 (m, 1 H), 2.56 (s, 3 H), 2.18-2.09 (m, 1 H), 1.87-1.74 (m, 1 H), 1.51 (d,  $J = 6.4$  Hz, 3 H), 1.41 (s, 9 H);  $^{13}C$  NMR (150 MHz,  $CDCl_3$ )  $\delta$  159.6, 146.3, 143.97, 143.95, 127.5, 124.5, 118.1, 115.9, 73.0, 34.9, 31.4, 29.0, 23.6, 21.4, 13.8; HRMS (ESI-TOF) Calcd for  $C_{18}H_{24}NO$   $[M+H]^+$ : 270.1858; found: 270.1856.

## 2.3 Optimization of Reaction Conditions

General: The reactions were conducted using 0.1 mmol of substrate **1a** in the indicated conditions in 1 mL of solvent. The temperature is the oil bath temperature. All yields were determined by  $^1\text{H}$  NMR using  $\text{CH}_2\text{Br}_2$  as internal standard.

### Ligand Screening

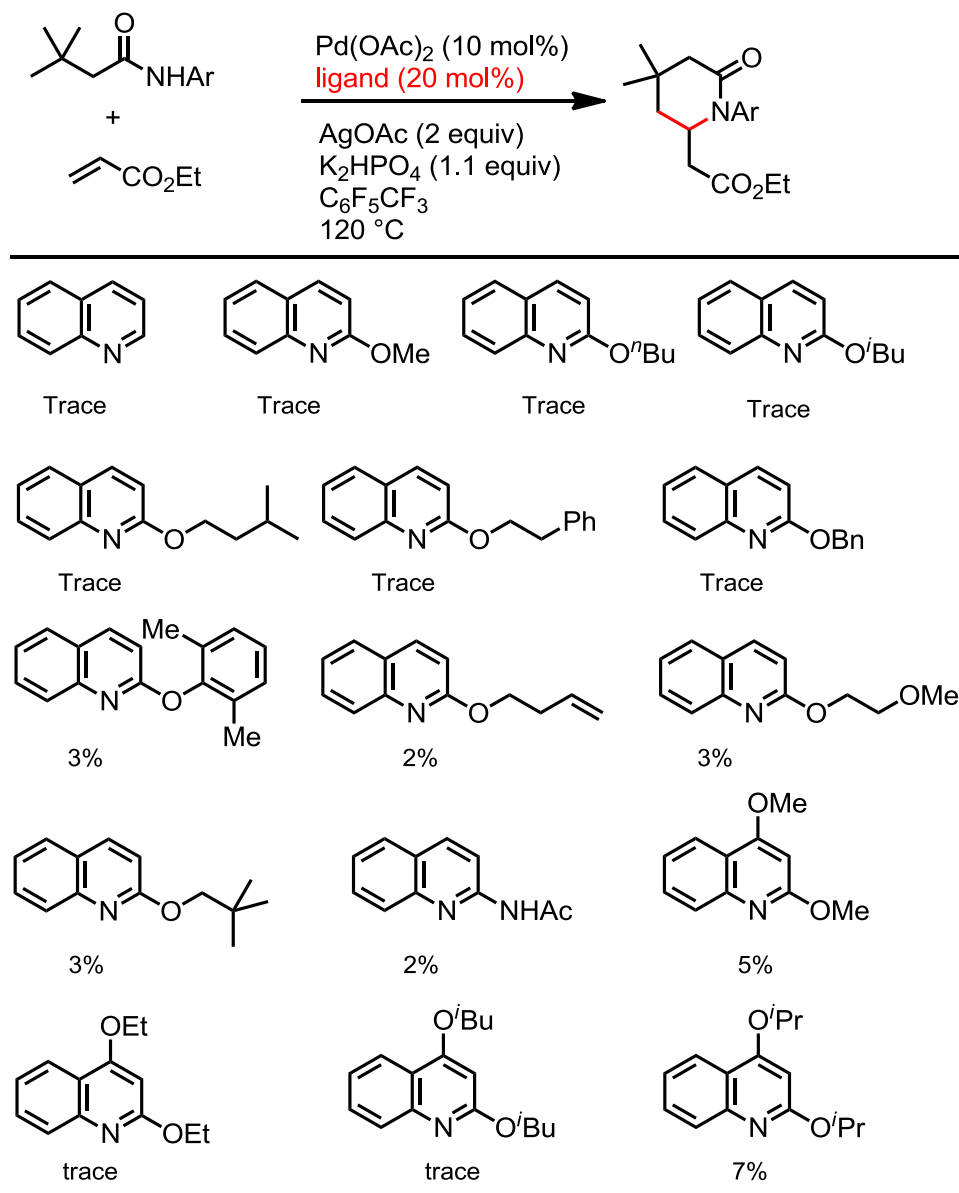

**Solvent Screening:**

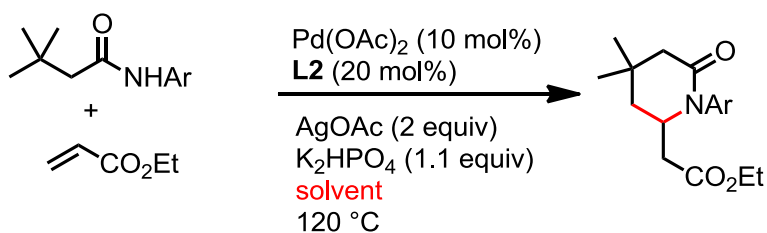

| Entry | Solvent                                       | NMR Yield (%) |
|-------|-----------------------------------------------|---------------|
| 1     | C <sub>6</sub> F <sub>5</sub> CF <sub>3</sub> | 45            |
| 2     | PhCF <sub>3</sub>                             | 16            |
| 3     | C <sub>6</sub> F <sub>6</sub>                 | 30            |
| 4     | Hex                                           | 33            |
| 5     | Toluene                                       | 37            |
| 6     | DCE                                           | 28            |
| 7     | <i>t</i> -AmylOH                              | 32            |
| 8     | <i>t</i> -BuOH                                | 35            |
| 9     | DMF                                           | Trace         |
| 10    | DMSO                                          | 0             |
| 11    | EA                                            | 19            |
| 12    | Hexafluoro-2-propanol                         | Trace         |
| 13    | THF                                           | 16            |
| 14    | Dioxane                                       | 27            |

**Ag Salt Screening:**

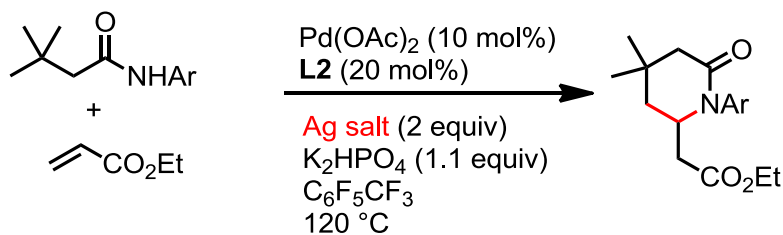

| Entry | Ag                       | NMR yield (%) |
|-------|--------------------------|---------------|
| 1     | AgOAc                    | 45            |
| 2     | $\text{Ag}_3\text{PO}_4$ | 11            |
| 3     | $\text{Ag}_2\text{O}$    | 25            |
| 4     | AgO                      | 12            |
| 5     | AgTFA                    | trace         |
| 6     | AgOPiv                   | 27            |

**Base Effect:**

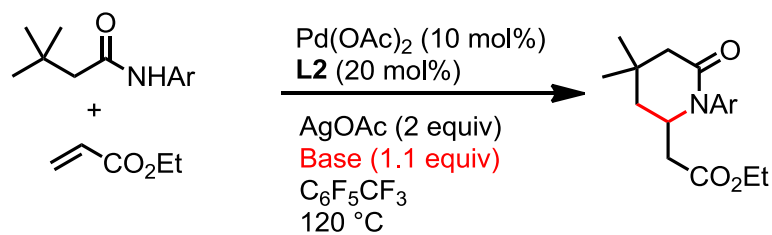

| Entry | Base                                                | NMR Yield (%) |
|-------|-----------------------------------------------------|---------------|
| 1     | $\text{Na}_2\text{HPO}_4 \cdot 6\text{H}_2\text{O}$ | 29            |
| 2     | NaOAc                                               | 29            |
| 3     | $\text{NaHCO}_3$                                    | 28            |
| 4     | NaOTs                                               | 40            |
| 5     | $\text{Na}_2\text{CO}_3$                            | 33            |
| 6     | $\text{K}_2\text{HPO}_4$                            | 45            |

**Auxiliary Groups:**

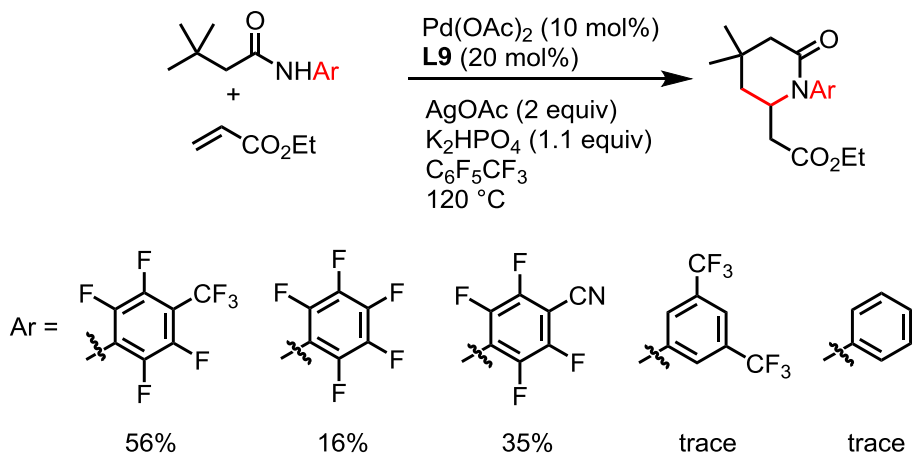

**Amount of  $K_2HPO_4$ :**

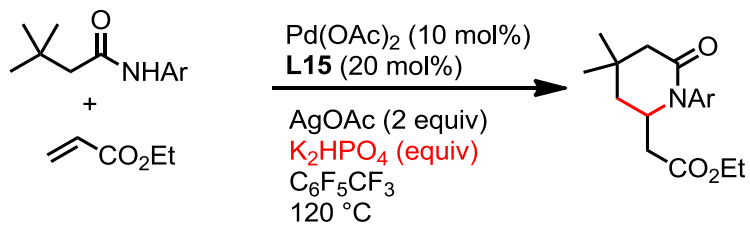

| Entry | $K_2HPO_4$ (Equiv) | NMR Yield (%) |
|-------|--------------------|---------------|
| 1     | 1.1                | 71            |
| 2     | 2                  | 71            |
| 3     | 3                  | 67            |

*Additional Base:*

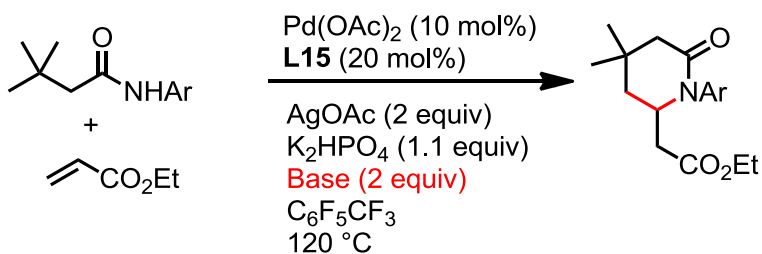

| Entry | Base                                                                    | NMR Yield (%) |
|-------|-------------------------------------------------------------------------|---------------|
| 1     | -                                                                       | 71            |
| 2     | Li <sub>2</sub> CO <sub>3</sub> (1 equiv)                               | 64            |
| 3     | Na <sub>2</sub> CO <sub>3</sub> (1 equiv)                               | 77            |
| 4     | K <sub>2</sub> CO <sub>3</sub> (1 equiv)                                | 58            |
| 5     | NaHCO <sub>3</sub> (2 equiv)                                            | 82            |
| 6     | NaHCO <sub>3</sub> (2 equiv) (without K <sub>2</sub> HPO <sub>4</sub> ) | 63            |
| 7     | KHCO <sub>3</sub>                                                       | 64            |
| 8     | NaOTs                                                                   | 68            |
| 9     | LiOAc                                                                   | 72            |
| 10    | CsF                                                                     | 32            |
| 11    | K <sub>3</sub> PO <sub>4</sub> (1 equiv)                                | 71            |
| 12    | LiCl                                                                    | 39            |
| 13    | NaOAc                                                                   | 51            |
| 14    | Na <sub>2</sub> HPO <sub>4</sub> ·7H <sub>2</sub> O                     | 67            |
| 15    | NaTFA                                                                   | 52            |
| 16    | NaCl                                                                    | 69            |
| 17    | NaNO <sub>2</sub>                                                       | 45            |



### TEMPO and O<sub>2</sub>:

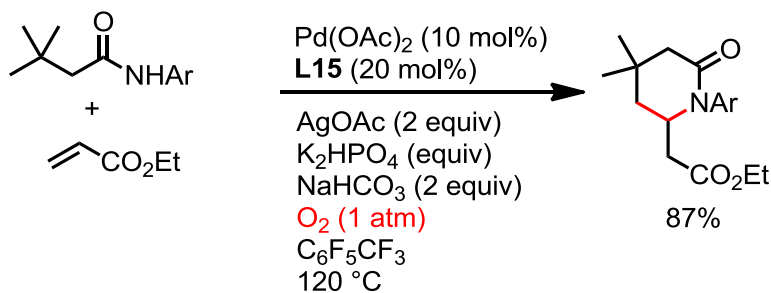

with 20 mol% of TEMPO: 90% (NMR)  
with 10 mol% of TEMPO: 95% (NMR)

### Ligand Screening in $\gamma$ -carbonylation reaction:

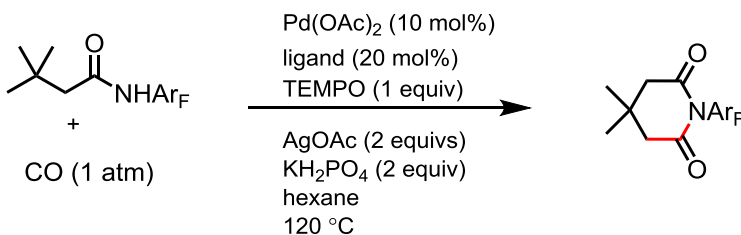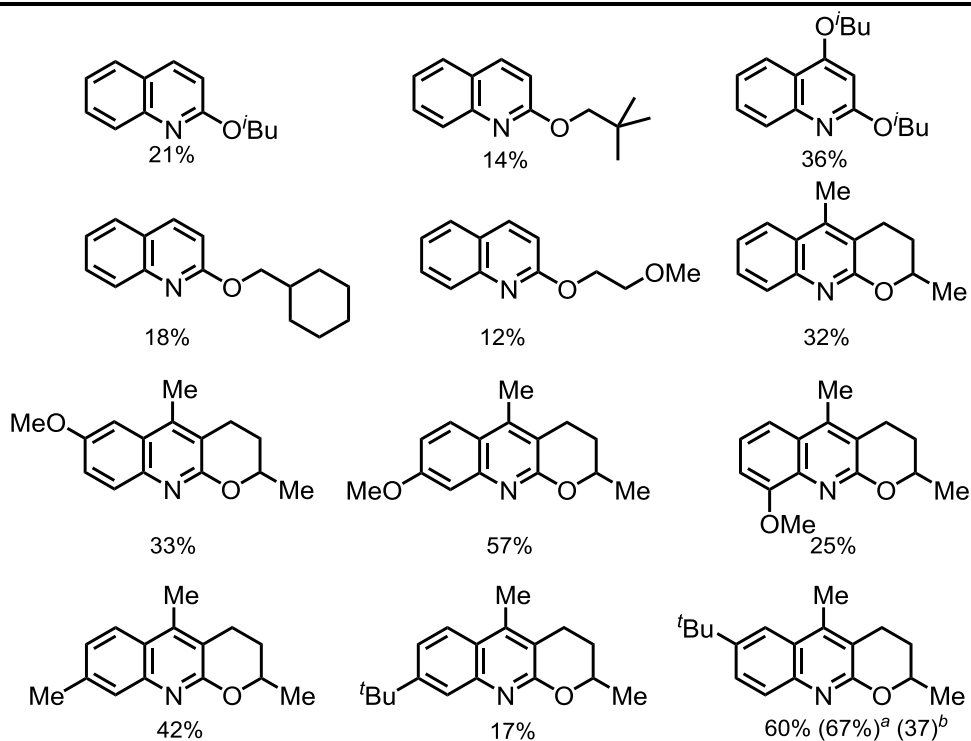

<sup>a</sup> *t*-butyl peroxide (2 equiv) was used instead of TEMPO in 150 °C. <sup>b</sup> Neither TEMPO nor *t*-butyl peroxide was used.

## 2.4 General Procedure for the Olefination of Amides

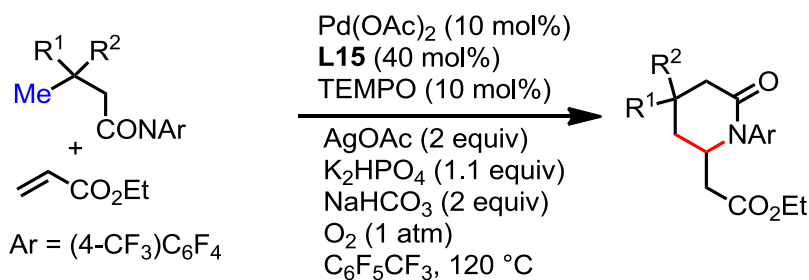

To an oven dried 50 mL Schlenk-type tube (with a Teflon high pressure valve and side arm) equipped with a magnetic stir bar were added substrate **1a** (33.1 mg, 0.1 mmol), Pd(OAc)<sub>2</sub> (2.3 mg, 0.01 mmol), **L15** (10.7 mg, 0.04 mmol), TEMPO (1.6 mg, 0.01 mmol), AgOAc (33.4 mg, 0.2 mmol), K<sub>2</sub>HPO<sub>4</sub> (19.2 mg, 0.11 mmol), NaHCO<sub>3</sub> (16.8 mg, 0.2 mmol), and 1 mL of C<sub>6</sub>F<sub>5</sub>CF<sub>3</sub> followed by 0.05 mL of ethyl acrylate. The mixture was frozen with a dry ice/acetone bath. The reaction tube was evacuated and back-filled with O<sub>2</sub> (3 times, balloon) and heated to 120 °C for 20 hours under vigorous stirring. Upon completion, the reaction mixture was cooled to room temperature. The reaction mixture was diluted with ethyl acetate and then filtered through a small pad of Celite. The solvents were removed under reduced pressure and the resulting mixture was purified by preparative TLC using hexanes/EtOAc as the eluent.

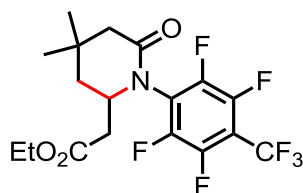

### **Ethyl 2-(4,4-dimethyl-6-oxo-1-(2,3,5,6-tetrafluoro-4-(trifluoromethyl)phenyl)piperidin-2-yl)acetate (2a)**

Substrate **1a** was olefinated following the general procedure. After purification by preparative TLC (eluent: hexanes/EtOAc = 5/1), **2a** was obtained as a white solid (37.3 mg, 87%). <sup>1</sup>H NMR (400 MHz, CDCl<sub>3</sub>) δ 4.35 (sext, *J* = 5.8 Hz, 1 H), 4.05-3.91 (m, 2 H), 2.50-2.34 (m, 4 H), 1.99 (ddd, *J*<sub>1</sub> = 13.6 Hz, *J*<sub>2</sub> = 4.6 Hz, *J*<sub>3</sub> = 2.0 Hz, 1 H), 1.71 (dd, *J*<sub>1</sub> = 13.6 Hz, *J*<sub>2</sub> = 11.2 Hz, 1 H), 1.19 (t, *J* = 7.2 Hz, 3 H), 1.13 (s, 3 H); <sup>13</sup>C NMR (150 MHz, CDCl<sub>3</sub>) δ 170.1, 169.8, 61.1, 53.6 (d, *J* = 2.9 Hz), 45.7, 42.0, 40.3, 30.4, 29.8, 24.5, 13.9; HRMS (ESI-TOF) Calcd for C<sub>18</sub>H<sub>19</sub>F<sub>7</sub>NO<sub>3</sub> [M+H]<sup>+</sup>: 430.1253; found: 430.1254.

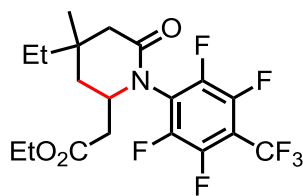

**Ethyl 2-(4-ethyl-4-methyl-6-oxo-1-(2,3,5,6-tetrafluoro-4-(trifluoromethyl)phenyl)piperidin-2-yl)acetate (2b)**

Substrate **1b** was olefinated following the general procedure. After purification by preparative TLC (eluent: hexanes/EtOAc = 5/1), **2b** was obtained as colorless oil (30.1 mg, 68%). The isomeric ratio (major/minor) was determined to be 56:44 by  $^1\text{H}$  NMR.  $^1\text{H}$  NMR (400 MHz,  $\text{CDCl}_3$ )  $\delta$  4.45-4.23 (m, 1 H), 4.06-3.91 (m, 2 H), 2.54-2.30 (m, 4 H), 2.12 (ddd,  $J_1 = 13.8$  Hz,  $J_2 = 5.0$  Hz,  $J_3 = 3.0$  Hz, 0.44 H), 1.97 (ddd,  $J_1 = 13.6$  Hz,  $J_2 = 5.2$  Hz,  $J_3 = 2.5$  Hz, 0.56 H), 1.68-1.36 (m, 3 H), 1.23-1.16 (m, 3 H), 1.14 (s, 1.68 H), 1.05 (s, 1.33 H), 1.00-0.87 (m, 3 H);  $^{13}\text{C}$  NMR (150 MHz,  $\text{CDCl}_3$ )  $\delta$  170.4, 170.2, 169.80, 169.75, 61.1, 53.4 (d,  $J = 2.9$  Hz), 53.2 (d,  $J = 2.9$  Hz), 44.8, 43.8, 40.4, 40.3, 40.0, 39.6, 35.7, 32.44, 32.37, 29.4, 26.3, 21.4, 13.93, 13.91, 8.1, 7.6; HRMS (ESI-TOF) Calcd for  $\text{C}_{19}\text{H}_{21}\text{F}_7\text{NO}_3$   $[\text{M}+\text{H}]^+$ : 444.1410; found: 444.1420.

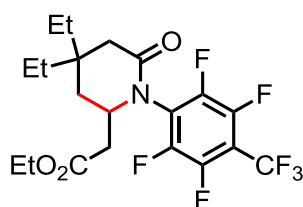

**Ethyl 2-(4,4-diethyl-6-oxo-1-(2,3,5,6-tetrafluoro-4-(trifluoromethyl)phenyl)piperidin-2-yl)acetate (2c)**

Substrate **1c** was olefinated following the general procedure. After purification by preparative TLC (eluent: hexanes/EtOAc = 5/1), **2c** was obtained as colorless oil (32.1 mg, 70%).  $^1\text{H}$  NMR (400 MHz,  $\text{CDCl}_3$ )  $\delta$  4.29 (sext,  $J = 5.8$  Hz, 1 H), 4.08-3.94 (m, 2 H), 2.53-2.27 (m, 4 H), 2.08 (ddd,  $J_1 = 13.7$  Hz,  $J_2 = 4.8$  Hz,  $J_3 = 3.2$  Hz, 1 H), 1.62-1.50 (m, 3 H), 1.48-1.31 (m, 2 H), 1.20 (t,  $J = 7.2$  Hz, 3 H), 0.96-0.84 (m, 6 H);  $^{13}\text{C}$  NMR (150 MHz,  $\text{CDCl}_3$ )  $\delta$  170.4, 169.7, 61.0, 53.0 (d,  $J = 2.9$  Hz), 42.6, 40.3, 37.8, 34.8, 30.7, 25.6, 13.9, 7.5, 7.1; HRMS (ESI-TOF) Calcd for  $\text{C}_{20}\text{H}_{23}\text{F}_7\text{NO}_3$   $[\text{M}+\text{H}]^+$ : 458.1566; found: 458.1567.

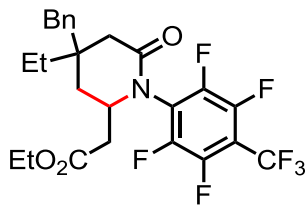

**Ethyl 2-(4-benzyl-4-ethyl-6-oxo-1-(2,3,5,6-tetrafluoro-4-(trifluoromethyl)phenyl)piperidin-2-yl)acetate (2d)**

Substrate **1d** was olefinated following the general procedure. After purification by preparative TLC (eluent: hexanes/EtOAc = 5/1), **2d** was obtained as yellow oil (25.2 mg, 49%). The isomeric ratio (major/minor) was determined to be 54:46 by  $^1\text{H}$  NMR.  $^1\text{H}$  NMR (400 MHz,  $\text{CDCl}_3$ )  $\delta$  7.37-7.23 (m, 3 H), 7.20-7.09 (m, 2 H), 4.62-4.51 (m, 0.46 H), 4.32-4.22 (m, 0.54 H), 4.06-3.94 (m, 2 H), 2.88 (d,  $J = 13.6$  Hz, 0.47 H), 2.80 (d,  $J = 13.6$  Hz, 0.47 H), 2.70 (d,  $J = 13.6$  Hz, 0.53 H), 2.65 (d,  $J = 13.6$  Hz, 0.53 H), 2.56-2.30 (m, 4 H), 2.14 (ddd,  $J_1 = 13.8$  Hz,  $J_2 = 5.0$  Hz,  $J_3 = 3.2$  Hz, 0.54 H), 2.05 (ddd,  $J_1 = 13.8$  Hz,  $J_2 = 5.5$  Hz,  $J_3 = 2.9$  Hz, 0.46 H), 1.75-1.50 (m, 1.82 H), 1.40-1.31 (m, 1.18 H), 1.23-1.15 (m, 3 H), 1.10 (t,  $J = 7.4$  Hz, 1.59 H), 0.98 (t,  $J = 7.4$  Hz, 1.41 H);  $^{13}\text{C}$  NMR (150 MHz,  $\text{CDCl}_3$ )  $\delta$  170.34, 170.27, 169.71, 169.68, 136.7, 136.2, 130.5, 130.4, 128.3, 126.8, 126.6, 61.12, 61.07, 53.37 (d,  $J = 2.9$  Hz), 52.85 (d,  $J = 2.9$  Hz), 44.1, 42.4, 41.5, 40.6, 40.2, 39.8, 37.5, 37.0, 36.5, 35.9, 30.9, 27.0, 13.9, 7.9, 7.5; HRMS (ESI-TOF) Calcd for  $\text{C}_{25}\text{H}_{25}\text{F}_7\text{NO}_3$   $[\text{M}+\text{H}]^+$ : 520.1723; found: 520.1724.

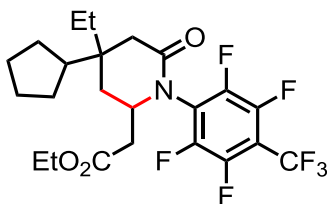

**Ethyl 2-(4-cyclopentyl-4-ethyl-6-oxo-1-(2,3,5,6-tetrafluoro-4-(trifluoromethyl)phenyl)piperidin-2-yl)acetate (2e)**

Substrate **1e** was olefinated following the general procedure. After purification by preparative TLC (eluent: hexanes/EtOAc = 5/1), **2e** was obtained as colorless oil (25.6 mg, 51%). The isomeric ratio (major/minor) was determined to be 55:45 by  $^1\text{H}$  NMR.  $^1\text{H}$  NMR (400 MHz,  $\text{CDCl}_3$ )  $\delta$  4.40-4.31 (m, 0.45 H), 4.30-4.22 (m, 0.55 H), 4.06-3.96 (m, 2 H), 2.55-2.30 (m, 4 H), 2.23-1.95 (m, 2 H), 1.78-1.50 (m, 8 H), 1.47-1.23 (m, 3 H), 1.20 (t,  $J = 7.2$  Hz, 3 H), 1.00-0.88 (m, 3 H);  $^{13}\text{C}$  NMR (150 MHz,  $\text{CDCl}_3$ )  $\delta$  171.3, 171.1, 169.78, 169.75, 61.09, 61.06, 53.5 (d,  $J = 2.3$  Hz), 52.8 (d,  $J = 2.6$  Hz), 45.0, 44.7, 40.6, 40.3, 40.1, 39.1, 36.6, 36.5, 35.5, 27.7, 27.5, 26.4, 26.3, 26.2, 25.9, 25.6, 25.54, 25.49, 25.4, 13.9, 8.0, 7.5; HRMS (ESI-TOF) Calcd for  $\text{C}_{23}\text{H}_{27}\text{F}_7\text{NO}_3$   $[\text{M}+\text{H}]^+$ : 498.1879; found: 498.1888.

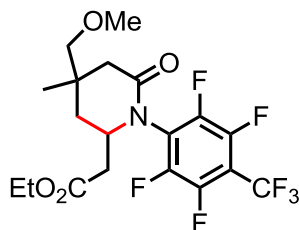

**Ethyl 2-(4-(methoxymethyl)-4-methyl-6-oxo-1-(2,3,5,6-tetrafluoro-4-(trifluoromethyl)phenyl)piperidin-2-yl)acetate (2f)**

Substrate **1f** was olefinated following the general procedure. After purification by preparative TLC (eluent: hexanes/EtOAc = 3/1), **2f** was obtained as yellow oil (28.3 mg, 62%). The isomeric ratio (major/minor) was determined to be 61:39 by  $^1\text{H}$  NMR.  $^1\text{H}$  NMR (400 MHz,  $\text{CDCl}_3$ )  $\delta$  4.45-4.30 (m, 1 H), 4.05-3.90 (m, 2 H), 3.45-3.90 (m, 5 H), 2.72-2.16 (m, 4 H), 2.00-1.85 (m, 1.39 H), 1.72-1.64 (m, 0.61 H), 1.25-1.06 (m, 6 H);  $^{13}\text{C}$  NMR (150 MHz,  $\text{CDCl}_3$ )  $\delta$  170.3, 170.1, 169.85, 169.77, 80.8, 78.5, 61.1, 61.0, 59.4, 59.3, 53.5 (d,  $J = 2.9$  Hz), 53.2 (d,  $J = 2.7$  Hz), 41.8, 40.6, 40.9, 40.32, 40.30, 38.6, 37.0, 34.1, 34.0, 26.0, 20.7, 13.9; HRMS (ESI-TOF) Calcd for  $\text{C}_{19}\text{H}_{21}\text{F}_7\text{NO}_4$   $[\text{M}+\text{H}]^+$ : 460.1359; found: 460.1359.

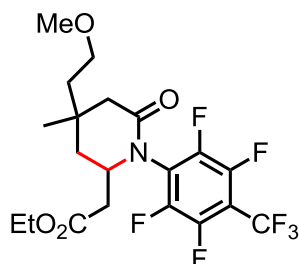

**Ethyl 2-(4-(2-methoxyethyl)-4-methyl-6-oxo-1-(2,3,5,6-tetrafluoro-4-(trifluoromethyl)phenyl)piperidin-2-yl)acetate (2g)**

Substrate **1g** was olefinated following the general procedure. After purification by preparative TLC (eluent: hexanes/EtOAc = 3/1), **2g** was obtained as colorless oil (24.2 mg, 51%). The isomeric ratio (major/minor) was determined to be 52:48 by  $^1\text{H}$  NMR.  $^1\text{H}$  NMR (400 MHz,  $\text{CDCl}_3$ )  $\delta$  4.45-4.30 (m, 1 H), 4.06-3.90 (m, 2 H), 3.56-3.46 (m, 2 H), 3.33 (s, 3 H), 2.60-2.31 (m, 4 H), 2.19 (ddd,  $J_1 = 13.7$  Hz,  $J_2 = 4.5$  Hz,  $J = 3.3$  Hz, 0.48 Hz), 2.07 (ddd,  $J_1 = 13.7$  Hz,  $J_2 = 4.7$  Hz,  $J = 2.3$  Hz, 0.52 Hz), 1.90-1.64 (m, 3 H), 1.27-1.09 (m, 6 H);  $^{13}\text{C}$  NMR (150 MHz,  $\text{CDCl}_3$ )  $\delta$  170.0, 169.9, 169.8, 169.7, 68.8, 68.6, 61.1, 61.0, 58.7, 58.6, 53.3 (d,  $J = 2.9$  Hz), 53.2 (d,  $J = 2.9$  Hz), 45.4, 44.5, 42.2, 40.6, 40.30, 40.28, 36.0, 31.92,

31.89, 27.2, 22.2, 13.92, 13.89.; HRMS (ESI-TOF) Calcd for C<sub>20</sub>H<sub>23</sub>F<sub>7</sub>NO<sub>4</sub> [M+H]<sup>+</sup>: 474.1515; found: 474.1516.

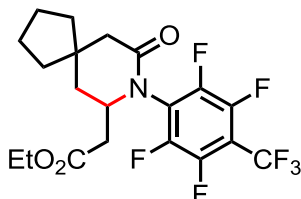

**Ethyl 2-(9-oxo-8-(2,3,5,6-tetrafluoro-4-(trifluoromethyl)phenyl)-8-azaspiro[4.5]decan-7-yl)acetate (2i)**

Substrate **1i** was olefinated following the general procedure. After purification by preparative TLC (eluent: hexanes/EtOAc = 5/1), **2i** was obtained as white solid (30.0 mg, 66%). <sup>1</sup>H NMR (400 MHz, CDCl<sub>3</sub>) δ 4.31 (sext, *J* = 5.8 Hz, 1 H), 4.05-3.92 (m, 2 H), 2.59-2.38 (m, 4 H), 2.05 (ddd, *J*<sub>1</sub> = 13.5 Hz, *J*<sub>2</sub> = 4.3 Hz, *J*<sub>3</sub> = 2.9 Hz, 1 H), 1.85 (dd, *J*<sub>1</sub> = 13.6 Hz, *J*<sub>2</sub> = 11.2 Hz, 1 H), 1.81-1.50 (m, 8 H), 1.19 (t, *J* = 7.2 Hz, 3 H); <sup>13</sup>C NMR (150 MHz, CDCl<sub>3</sub>) δ 170.3, 169.8, 61.1, 54.2 (d, *J* = 2.9 Hz), 44.1, 40.6, 40.4, 40.3, 40.0, 34.7, 24.4, 23.8, 13.9; HRMS (ESI-TOF) Calcd for C<sub>20</sub>H<sub>21</sub>F<sub>7</sub>NO<sub>3</sub> [M+H]<sup>+</sup>: 456.1410; found: 456.1411.

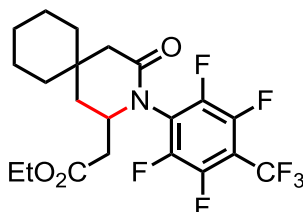

**Ethyl 2-(4-oxo-3-(2,3,5,6-tetrafluoro-4-(trifluoromethyl)phenyl)-3-azaspiro[5.5]undecan-2-yl)acetate (2j)**

Substrate **1j** was olefinated following the general procedure. After purification by preparative TLC (eluent: hexanes/EtOAc = 5/1), **2j** was obtained as white solid (32.1 mg, 68%). <sup>1</sup>H NMR (400 MHz, CDCl<sub>3</sub>) δ 4.32 (sext, *J* = 5.8 Hz, 1 H), 4.05-3.92 (m, 2 H), 2.64 (dd, *J*<sub>1</sub> = 17.2 Hz, *J*<sub>2</sub> = 3.2 Hz, 1 H), 2.50-2.38 (m, 2 H), 2.32-2.17 (m, 2 H), 1.65-1.35 (m, 11 H), 1.19 (t, *J* = 7.2 Hz, 3 H); <sup>13</sup>C NMR (150 MHz, CDCl<sub>3</sub>) δ 170.1, 169.8, 61.0, 52.8 (d, *J* = 2.9 Hz), 43.6, 40.3, 39.5, 39.1, 32.7, 32.4, 25.9, 21.6, 21.4, 13.9; HRMS (ESI-TOF) Calcd for C<sub>21</sub>H<sub>23</sub>F<sub>7</sub>NO<sub>3</sub> [M+H]<sup>+</sup>: 470.1566; found: 470.1569.

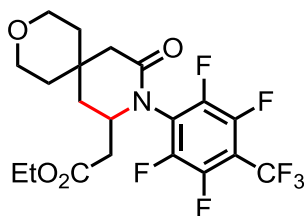

**Ethyl 2-(10-oxo-9-(2,3,5,6-tetrafluoro-4-(trifluoromethyl)phenyl)-3-oxa-9-azaspiro[5.5]undecan-8-yl)acetate (2k)**

Substrate **1k** was olefinated following the general procedure. After purification by preparative TLC (eluent: hexanes/EtOAc = 3/1), **2k** was obtained as yellow oil (39.2 mg, 83%). <sup>1</sup>H NMR (400 MHz, CDCl<sub>3</sub>) δ 4.34 (sext, *J* = 5.8 Hz, 1 H), 4.08-3.92 (m, 2 H), 3.84-3.62 (m, 4 H), 2.83 (dd, *J*<sub>1</sub> = 17.2 Hz, *J*<sub>2</sub> = 3.2 Hz, 1 H), 2.55-2.41 (m, 2 H), 2.35 (d, *J* = 17.2 Hz, 1 H), 2.28 (ddd, *J*<sub>1</sub> = 14.0 Hz, *J*<sub>2</sub> = 5.2 Hz, *J*<sub>3</sub> = 3.2 Hz, 1 H), 1.90-1.45 (m, 5 H), 1.20 (t, *J* = 7.0 Hz, 3 H); <sup>13</sup>C NMR (150 MHz, CDCl<sub>3</sub>) δ 169.6, 169.2, 63.3, 63.1, 61.2, 52.4 (d, *J* = 2.9 Hz), 42.5, 40.1, 39.7, 38.4, 32.8, 30.4, 13.9; HRMS (ESI-TOF) Calcd for C<sub>20</sub>H<sub>21</sub>F<sub>7</sub>NO<sub>4</sub> [M+H]<sup>+</sup>: 472.1359; found: 472.1361.

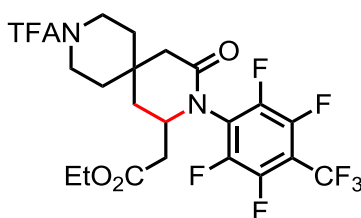

**Ethyl 2-(4-oxo-3-(2,3,5,6-tetrafluoro-4-(trifluoromethyl)phenyl)-9-(2,2,2-trifluoroacetyl)-3,9-diazaspiro[5.5]undecan-2-yl)acetate (2l)**

Substrate **1l** was olefinated following the general procedure. After purification by preparative TLC (eluent: hexanes/EtOAc = 2/1), **2l** was obtained as yellow oil (42.5 mg, 75%). The isomeric ratio (major/minor) was determined to be 1:1 by <sup>13</sup>C NMR. <sup>1</sup>H NMR (400 MHz, CDCl<sub>3</sub>) δ 4.32 (hept, *J* = 6.0 Hz, 1 H), 4.08-3.96 (m, 2 H), 3.95-3.85 (m, 1 H), 3.80-3.65 (m, 1 H), 3.65-3.50 (m, 2 H), 2.78 (dd, *J*<sub>1</sub> = 17.2 Hz, *J*<sub>2</sub> = 3.2 Hz, 1 H), 2.55-2.37 (m, 3 H), 2.31-2.22 (m, 1 H), 1.86-1.72 (m, 3 H), 1.69-1.59 (m, 2 H), 1.20 (t, *J* = 7.2 Hz, 3 H); <sup>13</sup>C NMR (150 MHz, CDCl<sub>3</sub>) δ 169.5, 169.4, 168.54, 168.51, 155.4 (q, *J* = 35.6 Hz), 155.3 (q, *J* = 35.6 Hz), 116.4 (q, *J* = 286.1 Hz), 61.32, 61.30, 52.5 (d, *J* = 2.9 Hz), 52.4 (d, *J* = 2.7 Hz), 41.9, 41.7, 41.6, 41.38, 41.36, 39.8, 39.3, 39.1, 39.0, 38.9, 38.2, 37.2, 32.5, 31.5, 31.4, 31.3, 13.9; HRMS (ESI-TOF) Calcd for C<sub>22</sub>H<sub>21</sub>F<sub>10</sub>N<sub>2</sub>O<sub>4</sub> [M+H]<sup>+</sup>: 567.1342; found: 567.1345.

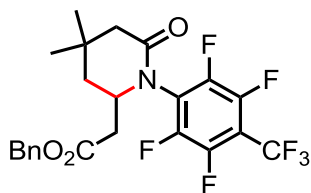

**Benzyl 2-(4,4-dimethyl-6-oxo-1-(2,3,5,6-tetrafluoro-4-(trifluoromethyl)phenyl)piperidin-2-yl)acetate (2aa)**

Substrate **1a** was olefinated following the general procedure. After purification by preparative TLC (eluent: hexanes/EtOAc = 3/1), **2aa** was obtained as yellow oil (39.2 mg, 83%).  $^1\text{H}$  NMR (400 MHz,  $\text{CDCl}_3$ )  $\delta$  7.40-7.26 (m, 5 H), 4.99 (s, 2 H), 4.31 (sext,  $J = 5.8$  Hz, 1 H), 2.54-2.30 (m, 4 H), 1.93 (ddd,  $J_1 = 13.7$  Hz,  $J_2 = 5.1$  Hz,  $J_3 = 2.5$  Hz, 1 H), 1.72-1.64 (m, 1 H), 1.15 (s, 3 H), 1.09 (s, 3 H);  $^{13}\text{C}$  NMR (150 MHz,  $\text{CDCl}_3$ )  $\delta$  170.1, 169.4, 134.9, 128.65, 128.63, 128.47, 66.8, 53.5 (d,  $J = 2.9$  Hz), 45.7, 41.7, 40.1, 30.4, 29.7, 24.4; HRMS (ESI-TOF) Calcd for  $\text{C}_{23}\text{H}_{21}\text{F}_7\text{NO}_3$   $[\text{M}+\text{H}]^+$ : 492.1410; found: 492.1410.

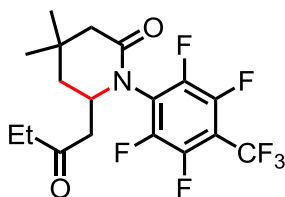

**4,4-dimethyl-6-(2-oxobutyl)-1-(2,3,5,6-tetrafluoro-4-(trifluoromethyl)phenyl)piperidin-2-one (2ab)**

Substrate **1a** was olefinated following the general procedure. After purification by preparative TLC (eluent: hexanes/EtOAc = 3/1), **2ab** was obtained as colorless oil (26.4 mg, 64%).  $^1\text{H}$  NMR (400 MHz,  $\text{CDCl}_3$ )  $\delta$  4.42 (sext,  $J = 5.8$  Hz, 1 H), 2.55 (d,  $J = 6.0$  Hz, 2 H), 2.44-2.24 (m, 4 H), 2.00 (ddd,  $J_1 = 13.6$  Hz,  $J_2 = 5.1$  Hz,  $J_3 = 2.6$  Hz, 1 H), 1.54 (dd,  $J_1 = 13.0$  Hz,  $J_2 = 11.8$  Hz, 1 H), 1.19 (s, 3 H), 1.11 (s, 3 H), 0.94 (t,  $J = 7.4$  Hz, 3 H);  $^{13}\text{C}$  NMR (150 MHz,  $\text{CDCl}_3$ )  $\delta$  207.2, 170.3, 52.7 (d,  $J = 2.9$  Hz), 47.6, 45.8, 42.1, 36.7, 30.5, 29.8, 24.5, 7.2; HRMS (ESI-TOF) Calcd for  $\text{C}_{18}\text{H}_{19}\text{F}_7\text{NO}_2$   $[\text{M}+\text{H}]^+$ : 414.1304; found: 414.1305.

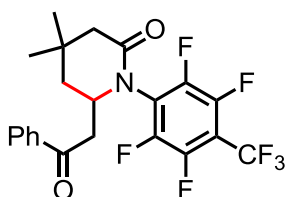



### 4,4-dimethyl-6-(2-oxo-2-phenylethyl)-1-(2,3,5,6-tetrafluoro-4-(trifluoromethyl)phenyl)piperidin-2-one (2ac)

Substrate **1a** was olefinated following the general procedure. After purification by preparative TLC (eluent: hexanes/EtOAc = 3/1), **2ac** was obtained as white solid (32.2 mg, 70%). <sup>1</sup>H NMR (400 MHz, CDCl<sub>3</sub>) δ 7.79-7.72 (m, 2 H), 7.62-7.55 (m, 1 H), 7.50-7.40 (m, 2 H), 4.70 (sext, *J* = 5.7 Hz, 1 H), 3.22 (dd, *J*<sub>1</sub> = 17.0 Hz, *J*<sub>2</sub> = 5.8 Hz, 1 H), 2.96 (dd, *J*<sub>1</sub> = 16.8 Hz, *J*<sub>2</sub> = 5.6 Hz, 1 H), 2.48-2.37 (m, 2 H), 2.08 (ddd, *J*<sub>1</sub> = 13.6 Hz, *J*<sub>2</sub> = 5.2 Hz, *J*<sub>3</sub> = 2.4 Hz, 1 H), 1.70 (dd, *J*<sub>1</sub> = 13.6 Hz, *J*<sub>2</sub> = 11.2 Hz, 1 H), 1.23 (s, 3 H), 1.13 (s, 3 H); <sup>13</sup>C NMR (150 MHz, CDCl<sub>3</sub>) δ 196.1, 170.2, 135.8, 134.0, 128.8, 127.6, 53.7 (d, *J* = 2.7 Hz), 45.8, 43.5, 42.6, 30.5, 29.9, 24.5; HRMS (ESI-TOF) Calcd for C<sub>22</sub>H<sub>19</sub>F<sub>7</sub>NO<sub>2</sub> [M+H]<sup>+</sup>: 462.1298; found: 462.1299.

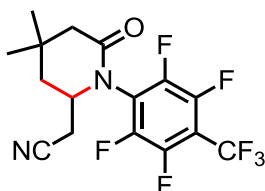

### 2-(4,4-dimethyl-6-oxo-1-(2,3,5,6-tetrafluoro-4-(trifluoromethyl)phenyl)piperidin-2-yl)acetonitrile (2ad)

Substrate **1a** was olefinated following the general procedure. After purification by preparative TLC (eluent: hexanes/EtOAc = 3/1), **2ad** was obtained as white solid (27.9 mg, 73%). <sup>1</sup>H NMR (400 MHz, CDCl<sub>3</sub>) δ 4.17 (sext, *J* = 5.1 Hz, 1 H), 2.55-2.35 (m, 4 H), 2.09 (ddd, *J*<sub>1</sub> = 13.8 Hz, *J*<sub>2</sub> = 5.2 Hz, *J*<sub>3</sub> = 1.8 Hz, 1 H), 1.87 (t, *J* = 12.6 Hz, 1 H), 1.19 (s, 6 H); <sup>13</sup>C NMR (150 MHz, CDCl<sub>3</sub>) δ 169.7, 115.2, 52.9 (d, *J* = 3.8 Hz), 45.5, 41.5, 30.2, 29.8, 24.30, 24.28; HRMS (ESI-TOF) Calcd for C<sub>16</sub>H<sub>14</sub>F<sub>7</sub>N<sub>2</sub>O [M+H]<sup>+</sup>: 383.0994; found: 383.0983.

### Gram Scale Synthesis

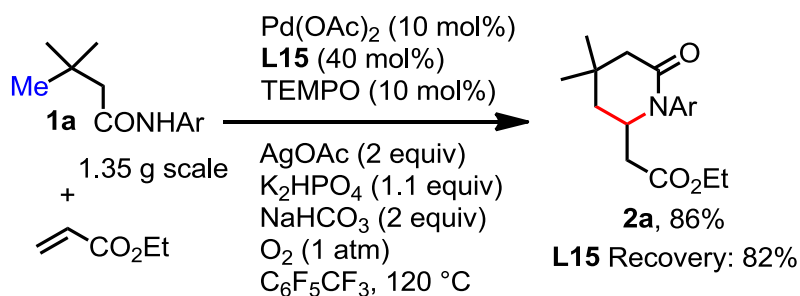

## Ethyl 2-(4,4-dimethyl-6-oxo-1-(2,3,5,6-tetrafluoro-4-(trifluoromethyl)phenyl)piperidin-2-yl)acetate (2a)

To an oven dried 350 mL Schlenk-type tube (with a Teflon high pressure valve and side arm) equipped with a magnetic stir bar were added substrate **1a** (1.3202 g, 4.0 mmol), Pd(OAc)<sub>2</sub> (89.0 mg, 0.4 mmol), **L15** (431.1 mg, 1.6 mmol), TEMPO (62.2 mg, 0.4 mmol), AgOAc (1.3401 g, 8.0 mmol), K<sub>2</sub>HPO<sub>4</sub> (766.4 mg, 4.4 mmol), NaHCO<sub>3</sub> (672.0 mg, 8.0 mmol), and 20 mL of C<sub>6</sub>F<sub>5</sub>CF<sub>3</sub> followed by 1.0 mL of ethyl acrylate. The mixture was frozen with a dry ice/acetone bath. The reaction tube was evacuated and back-filled with O<sub>2</sub> (3 times, balloon) and heated to 120 °C (oil bath) for 20 hours under vigorous stirring. Upon completion, the reaction mixture was cooled to room temperature. The reaction mixture was diluted with ethyl acetate and then filtered through a small pad of Celite. The solvents were removed under reduced pressure and the resulting mixture was purified by column chromatography on silica gel (hexanes/ethyl acetate = 10/1 ~ 2:1) to afford 1.4814 g of **2a** (86%) and 353.8 mg of **L14** (82%).

### 2.5 Procedure for Cleavage of Auxiliary

#### (E)-diethyl 5,5-dimethylhept-2-enedioate (3a)

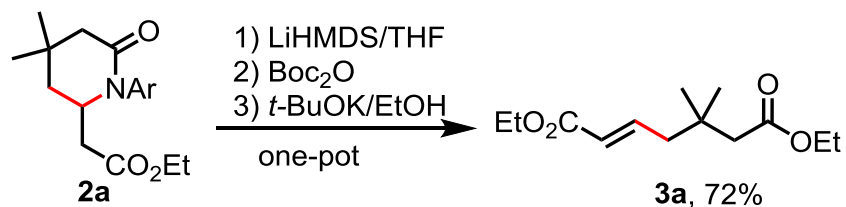

To an oven dried 50 mL Schlenk-type tube equipped with a magnetic stir bar were added lactam (128.8 mg, 0.30 mmol) and 1 mL of anhydrous THF. After cooling to -78 °C, LiHMDS (0.5 M in 2-methyltetrahydrofuran, 1.5 mL, 0.75 mmol) was added dropwise within 5 minutes. The mixture was warmed up to -20 °C naturally in 40 minutes. Then Boc<sub>2</sub>O (0.24 mL, d = 0.95 g/mL, 1.05 mmol) was added in -78 °C followed by warming up to room temperature naturally in 2 hours. EtOH (2 mL) and KO<sup>t</sup>Bu (168.3 mg, 1.5 mmol) were added at room temperature. After stirring at room temperature for 5 hours, the reaction was quenched with saturate NH<sub>4</sub>Cl (5 mL) and extracted with ethyl acetate (6 mL × 3). The combined organic layer was washed with brine and dried over MgSO<sub>4</sub>, filtrated and concentrated. The crude product was purified by preparative TLC using hexanes/EtOAc (10/1) as the eluent to afford 52.2 mg of **3a** (72%) as colorless oil. <sup>1</sup>H NMR (400 MHz, CDCl<sub>3</sub>) δ 7.21-6.92 (m, 1 H), 5.85 (dt, *J*<sub>1</sub> = 15.6 Hz, *J*<sub>2</sub> = 1.3 Hz, 1 H), 4.19 (q, *J* = 7.2 Hz, 2 H), 4.13 (q, *J* = 7.2 Hz, 2 H), 2.25 (dd, *J*<sub>1</sub> = 8.0 Hz, *J*<sub>2</sub> =

1.2 Hz, 2 H), 2.21 (s, 2 H), 1.30 (t,  $J = 7.2$  Hz, 3 H), 1.26 (t,  $J = 7.2$  Hz, 3 H), 1.05 (s, 6 H);  $^{13}\text{C}$  NMR (150 MHz,  $\text{CDCl}_3$ )  $\delta$  172.6, 167.2, 146.2, 125.0, 61.0, 60.9, 46.6, 45.2, 34.7, 28.2, 15.11, 15.09; HRMS (ESI-TOF) Calcd for  $\text{C}_{13}\text{H}_{23}\text{O}_4$   $[\text{M}+\text{H}]^+$ : 243.1596; found: 243.1594.

## 2.6 Procedure for Construction of Poly-functionalized Quaternary Carbon Centers

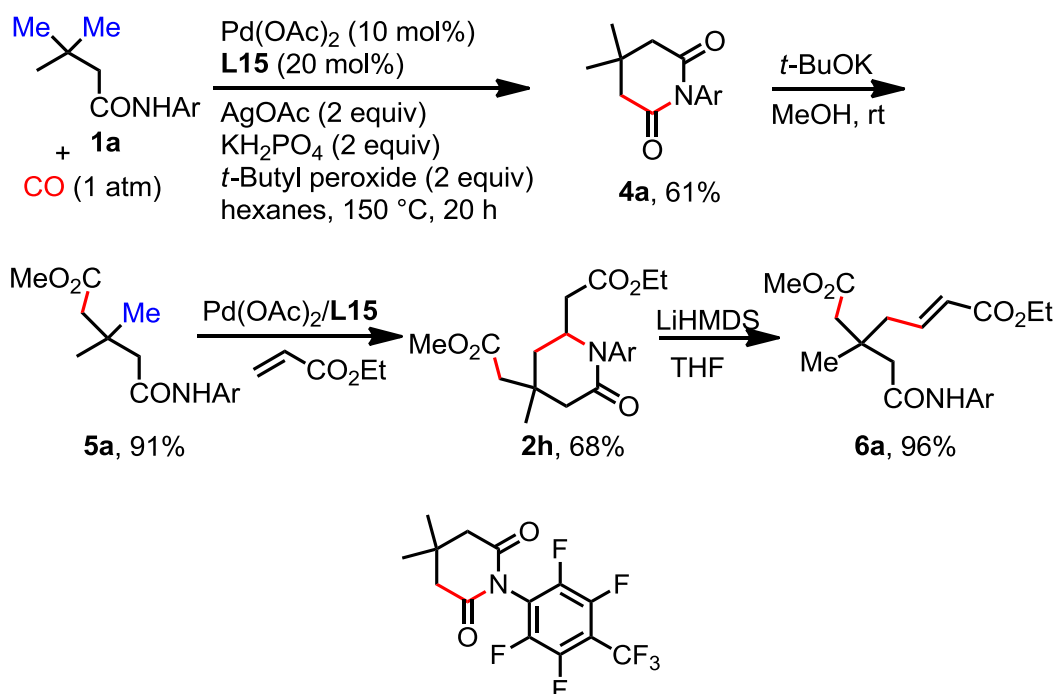

### 4,4-dimethyl-1-(2,3,5,6-tetrafluoro-4-(trifluoromethyl)phenyl)piperidine-2,6-dione (**4a**)

To an oven dried 350 mL Schlenk-type tube (with a Teflon high pressure valve and side arm) equipped with a magnetic stir bar were added substrate **1a** (1.3207 g, 4.0 mmol),  $\text{Pd}(\text{OAc})_2$  (89.8 mg, 0.4 mmol), **L15** (215.3 mg, 0.8 mmol), *Di*-tert-butyl peroxide (1.47 mL,  $d = 0.794$  g/mL, 1.1698 g, 8 mmol),  $\text{AgOAc}$  (1.3350 g, 8.0 mmol),  $\text{KH}_2\text{PO}_4$  (1.0887 g, 8.0 mmol) and 20 mL of hexanes. The mixture was frozen with a dry ice/acetone bath. The reaction tube was evacuated and back-filled with CO (3 times, balloon) and heated to  $150\text{ }^\circ\text{C}$  (oil bath) for 20 hours under vigorous stirring. Upon completion, the reaction mixture was cooled to room temperature. The reaction mixture was diluted with ethyl acetate and then filtered through a small pad of Celite. The solvents were removed under reduced pressure and the resulting mixture was purified by column chromatography on silica gel (hexanes/ethyl acetate = 15/1) to afford 873.2 mg of **6a** (61%) as yellow solid.  $^1\text{H}$  NMR (400 MHz,  $\text{CDCl}_3$ )  $\delta$  2.74 (s, 4 H), 1.24 (s, 6 H);

$^{13}\text{C}$  NMR (150 MHz,  $\text{CDCl}_3$ )  $\delta$  169.7, 45.9, 29.6, 27.5; HRMS (ESI-TOF) Calcd for  $\text{C}_{14}\text{H}_{11}\text{F}_7\text{NO}_2$   $[\text{M}+\text{H}]^+$ : 358.0672; found: 358.0673.

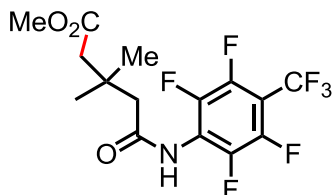

**3,3-dimethyl-5-oxo-5-[2,3,5,6-tetrafluoro-4-(trifluoromethyl)phenylamino]-pentanoic acid methyl ester (5a)**

To a 100 mL of round bottle flask was added **6a** (714.4 mg, 2.0 mmol), MeOH (15 mL) and KO<sup>t</sup>Bu (336.6 mg, 3.0 mmol). The mixture was stirred at room temperature for 6 hours. Upon completion, the reaction was quenched with sat.  $\text{NH}_4\text{Cl}$  and extracted with EtOAc (15 mL  $\times$  3). The organic layer was washed with brine and dried over  $\text{MgSO}_4$ , filtrated and concentrated. The crude product was purified by column chromatography on silica gel (hexanes/ethyl acetate = 4/1) to afford 708.9 mg of **7a** (91%) as white solid.  $^1\text{H}$  NMR (400 MHz,  $\text{CDCl}_3$ )  $\delta$  9.15 (br s, 1 H), 3.77 (s, 3 H), 2.54 (s, 2 H), 2.46 (s, 2 H), 1.14 (s, 6 H);  $^{13}\text{C}$  NMR (150 MHz,  $\text{CDCl}_3$ )  $\delta$  174.8, 168.9, 52.2, 46.7, 44.4, 34.1, 28.9; HRMS (ESI-TOF) Calcd for  $\text{C}_{15}\text{H}_{15}\text{F}_7\text{NO}_3$   $[\text{M}+\text{H}]^+$ : 390.0940; found: 390.0939.

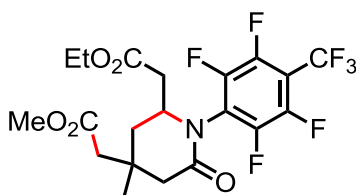

**Ethyl 2-(4-(2-methoxy-2-oxoethyl)-4-methyl-6-oxo-1-(2,3,5,6-tetrafluoro-4-(trifluoromethyl)phenyl)piperidin-2-yl)acetate (2h)**

To an oven dried 250 mL Schlenk-type tube (with a Teflon high pressure valve and side arm) equipped with a magnetic stir bar were added substrate **7a** (389.3 g, 1.0 mmol),  $\text{Pd}(\text{OAc})_2$  (22.5 mg, 0.1 mmol), **L15** (107.7 mg, 0.4 mmol), TEMPO (15.6 mg, 0.1 mmol),  $\text{AgOAc}$  (334.0 mg, 2.0 mmol),  $\text{K}_2\text{HPO}_4$  (191.6 mg, 4.4 mmol),  $\text{NaHCO}_3$  (168.0 mg, 2.0 mmol), and 5 mL of  $\text{C}_6\text{F}_5\text{CF}_3$  followed by 0.43 mL of ethyl acrylate. The mixture was frozen with a dry ice/acetone bath. The reaction tube was evacuated and

back-filled with O<sub>2</sub> (3 times, balloon) and heated to 120 °C (oil bath) for 20 hours under vigorous stirring. Upon completion, the reaction mixture was cooled to room temperature. The reaction mixture was diluted with ethyl acetate and then filtered through a small pad of Celite. The solvents were removed under reduced pressure and the resulting mixture was purified by column chromatography on silica gel (hexanes/ethyl acetate = 10/1) to afford 332.1 g of **2h** (68%) as yellow oil. The isomeric ratio (major/minor) was determined to be 1:1 by <sup>1</sup>H NMR. <sup>1</sup>H NMR (400 MHz, CDCl<sub>3</sub>) δ 4.45-4.30 (m, 1 H), 4.05-3.91 (m, 2 H), 3.72 (s, 1.5 H), 3.71 (s, 1.5 H), 2.70-2.15 (m, 7 H), 1.88 (t, *J* = 12.6 Hz, 0.5 H), 1.73 (dd, *J*<sub>1</sub> = 14.0 Hz, *J*<sub>2</sub> = 11.2 Hz, 0.5 H), 1.35-1.10 (m, 6 H); <sup>13</sup>C NMR (150 MHz, CDCl<sub>3</sub>) δ 171.2, 170.9, 169.6, 169.5, 169.3, 169.1, 61.14, 61.12, 53.31 (d, *J* = 2.7 Hz), 53.10 (d, *J* = 2.7 Hz), 51.71, 51.66, 46.5, 45.0, 43.7, 40.9, 40.08, 40.06, 39.6, 39.5, 32.2, 32.0, 27.2, 22.5, 13.90, 13.89; HRMS (ESI-TOF) Calcd for C<sub>20</sub>H<sub>21</sub>F<sub>7</sub>NO<sub>5</sub> [M+H]<sup>+</sup>: 488.1308; found: 488.1306.

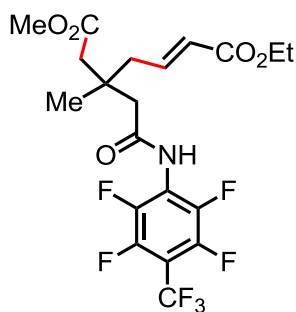

**(E)-5-(2-oxo-2-(2,3,5,6-tetrafluoro-4-(trifluoromethyl)phenyl)amino)ethyl-5-methyl-2-heptenedioic acid 1-ethyl 7-methyl ester (6a)**

To an oven dried 50 mL Schlenk-type tube equipped with a magnetic stir bar were added lactam (49.1 mg, 0.1 mmol) and 1 mL of anhydrous THF. After cooling to -78 °C, LiHMDS (0.5 M in 2-methyltetrahydrofuran, 1.0 mL, 0.50 mmol) was added dropwise within 5 minutes. The mixture was warmed up to -20 °C naturally in 40 minutes. Then the reaction was quenched with sat. NH<sub>4</sub>Cl/AcOH (V/V = 20/1, 2 mL) in -78 °C and extracted with ethyl acetate (6 mL × 3). The combined organic layer was washed with brine and dried over MgSO<sub>4</sub>, filtrated and concentrated. The crude product was purified by preparative TLC using hexanes/EtOAc (3/1) as the eluent to afford 45.7 mg of **8a** (93%) as yellow oil. <sup>1</sup>H NMR (400 MHz, CDCl<sub>3</sub>) δ 9.06 (s, 1 H), 7.04-6.90 (m, 1 H), 5.93 (dt, *J*<sub>1</sub> = 15.6 Hz, *J*<sub>2</sub> = 1.4 Hz, 1 H), 4.21 (q, *J* = 7.1 Hz, 2 H), 3.77 (s, 3 H), 2.63 (d, *J* = 12.8 Hz, 1 H), 2.58 (d, *J* = 13.2 Hz, 1 H), 2.52 (d, *J* = 14.0 Hz, 1 H), 2.48 (d, *J* = 14.0 Hz, 1 H), 2.41-2.25 (m, 2 H), 1.30 (t, *J* = 7.2 Hz, 3 H), 1.15 (s, 3 H); <sup>13</sup>C NMR (150 MHz, CDCl<sub>3</sub>) δ 174.1, 168.6, 166.0, 142.8, 125.7, 60.4, 52.2, 44.7, 43.2, 42.8, 37.1, 25.5, 14.2; HRMS (ESI-TOF) Calcd for C<sub>20</sub>H<sub>21</sub>F<sub>7</sub>NO<sub>5</sub> [M+H]<sup>+</sup>: 488.1308; found: 488.1307.

### 3. Reference:

1. Sridharan, V.; Ruiz, M.; Menéndez, J. C. *Synthesis* **2010**, 1053.
2. Zhang, Q.; Zhang, Z.; Yan, Z.; Liu, Q.; Wang, T. *Org. Lett.* **2007**, 9, 3651.

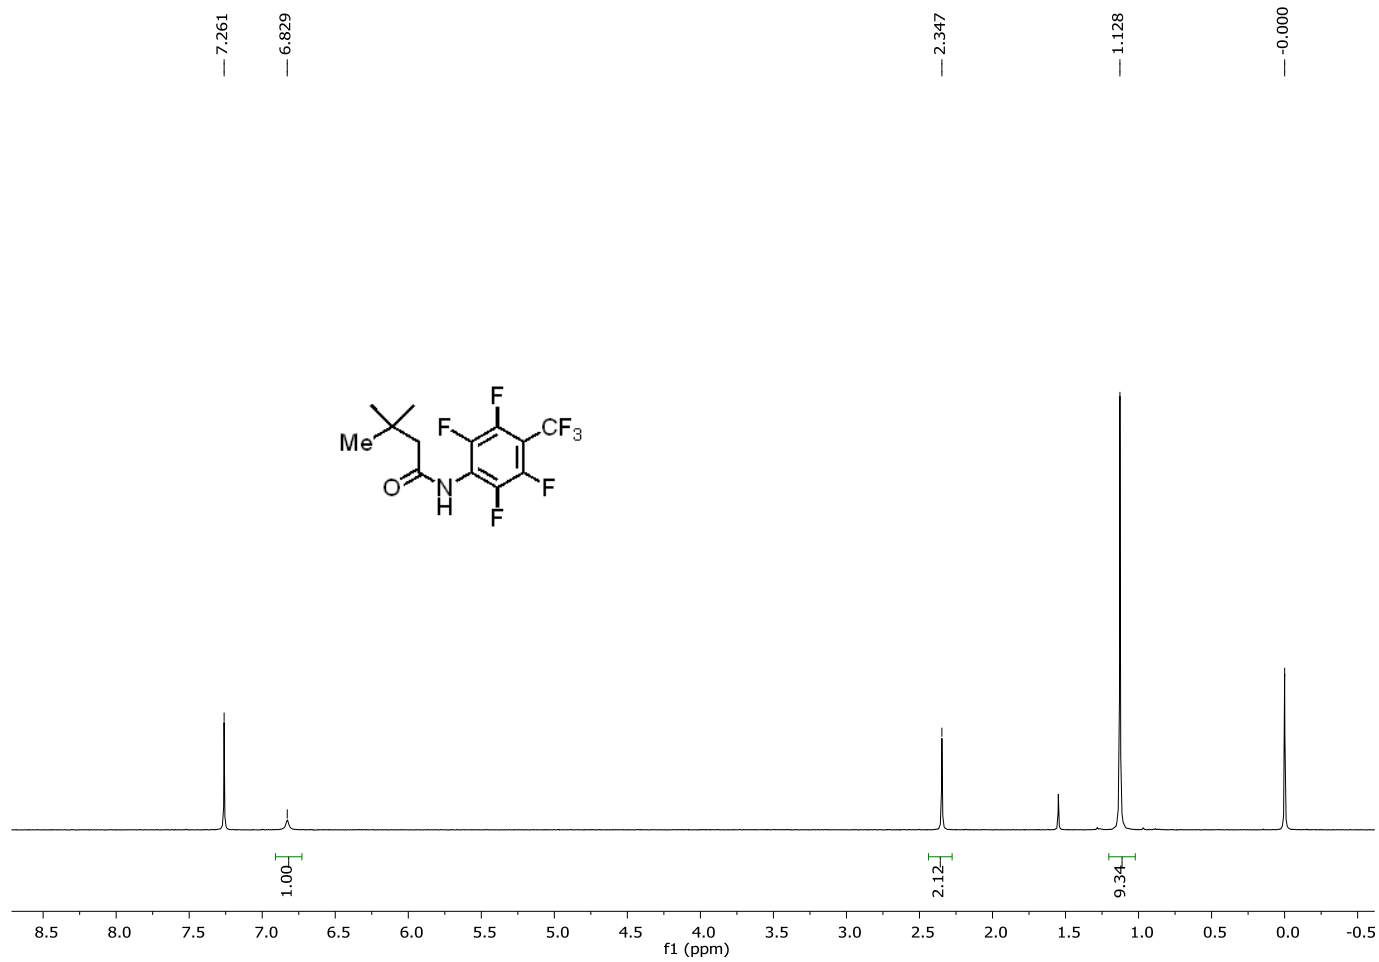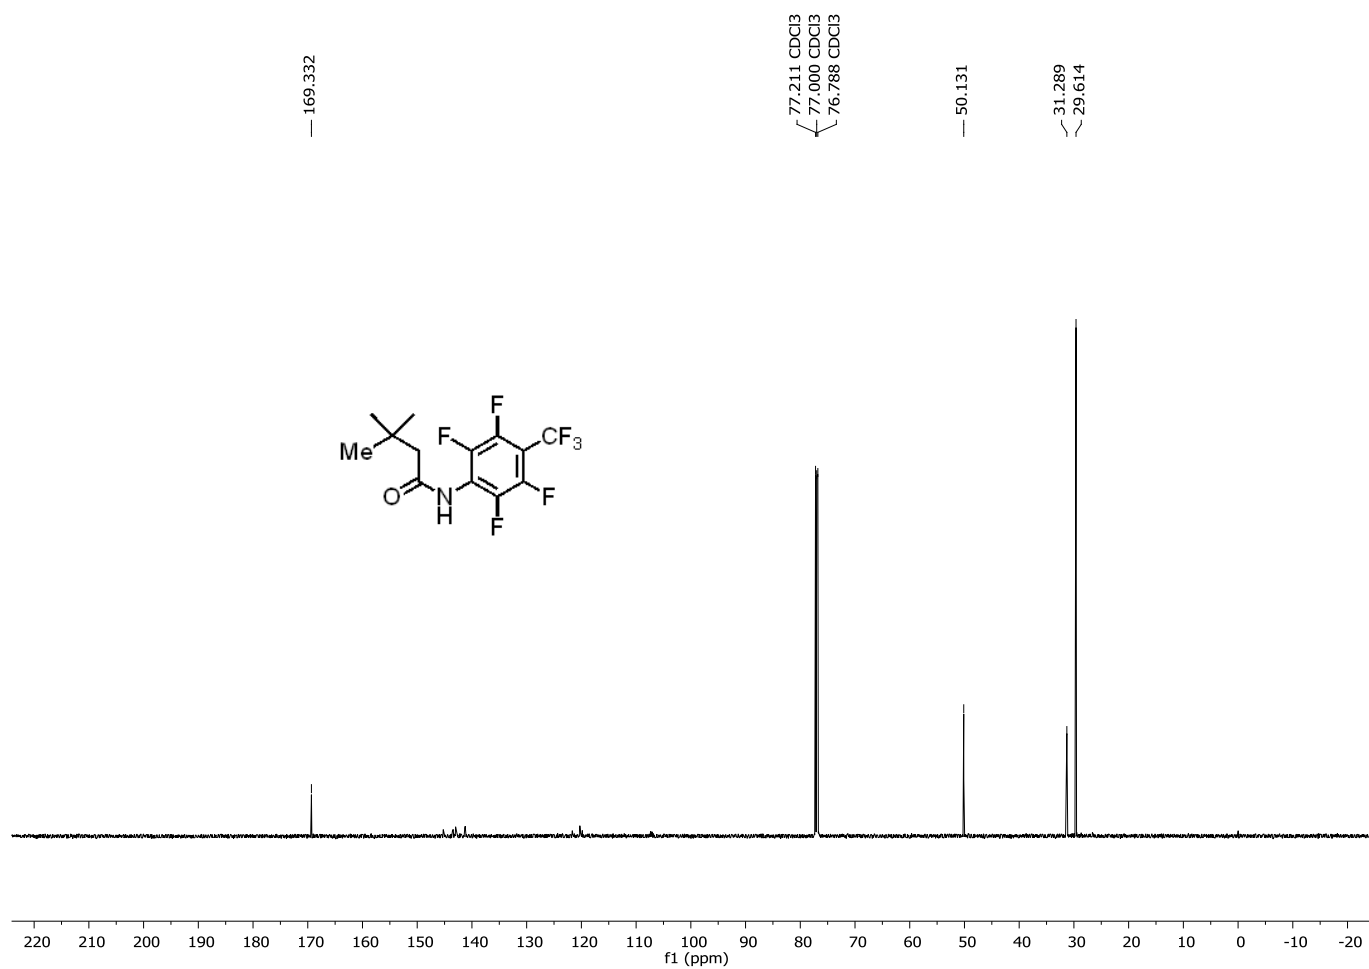

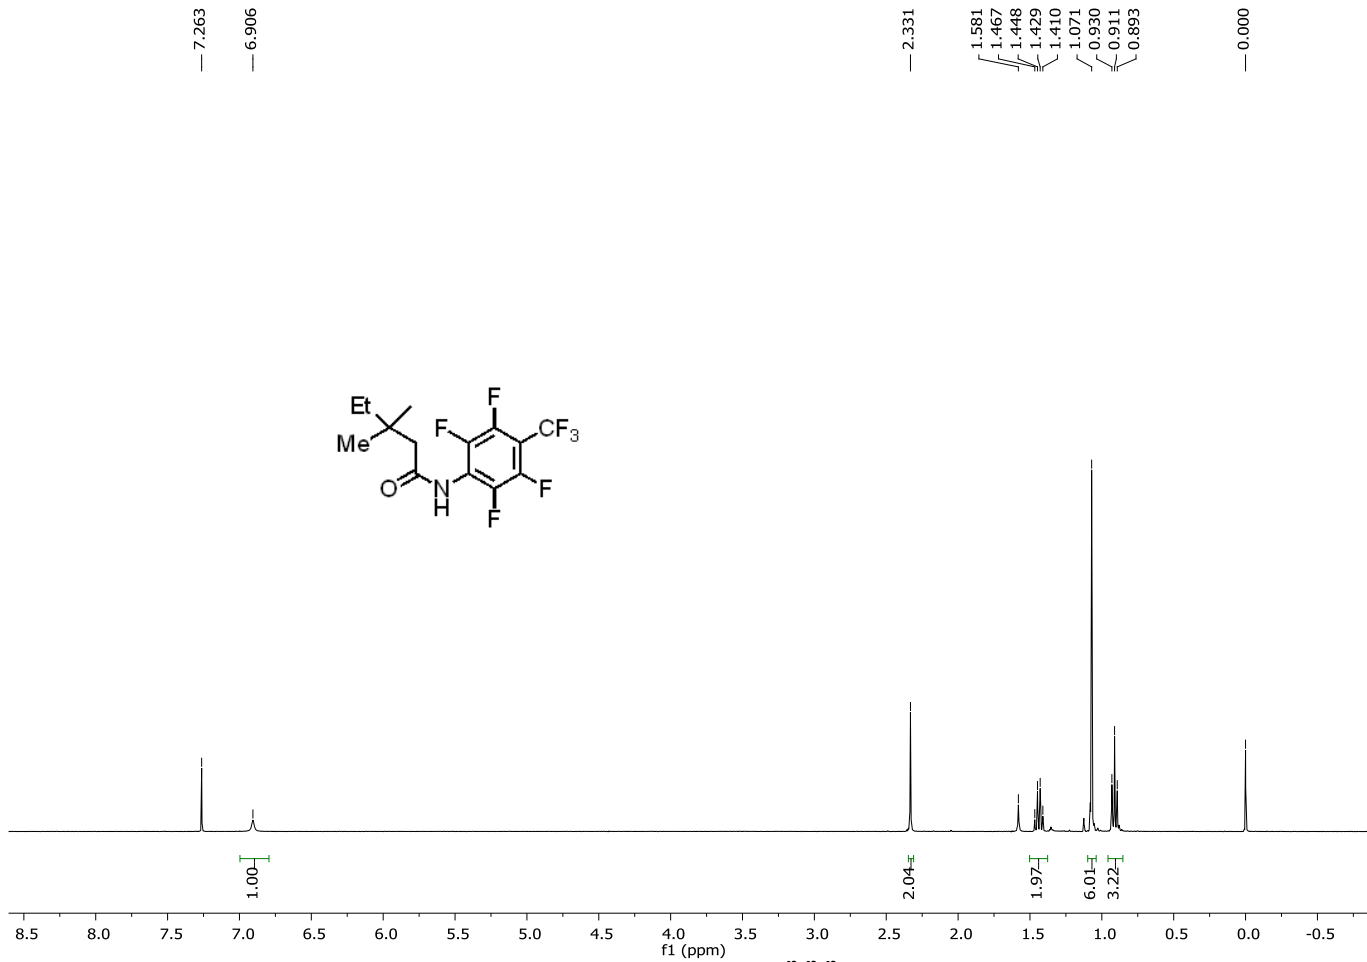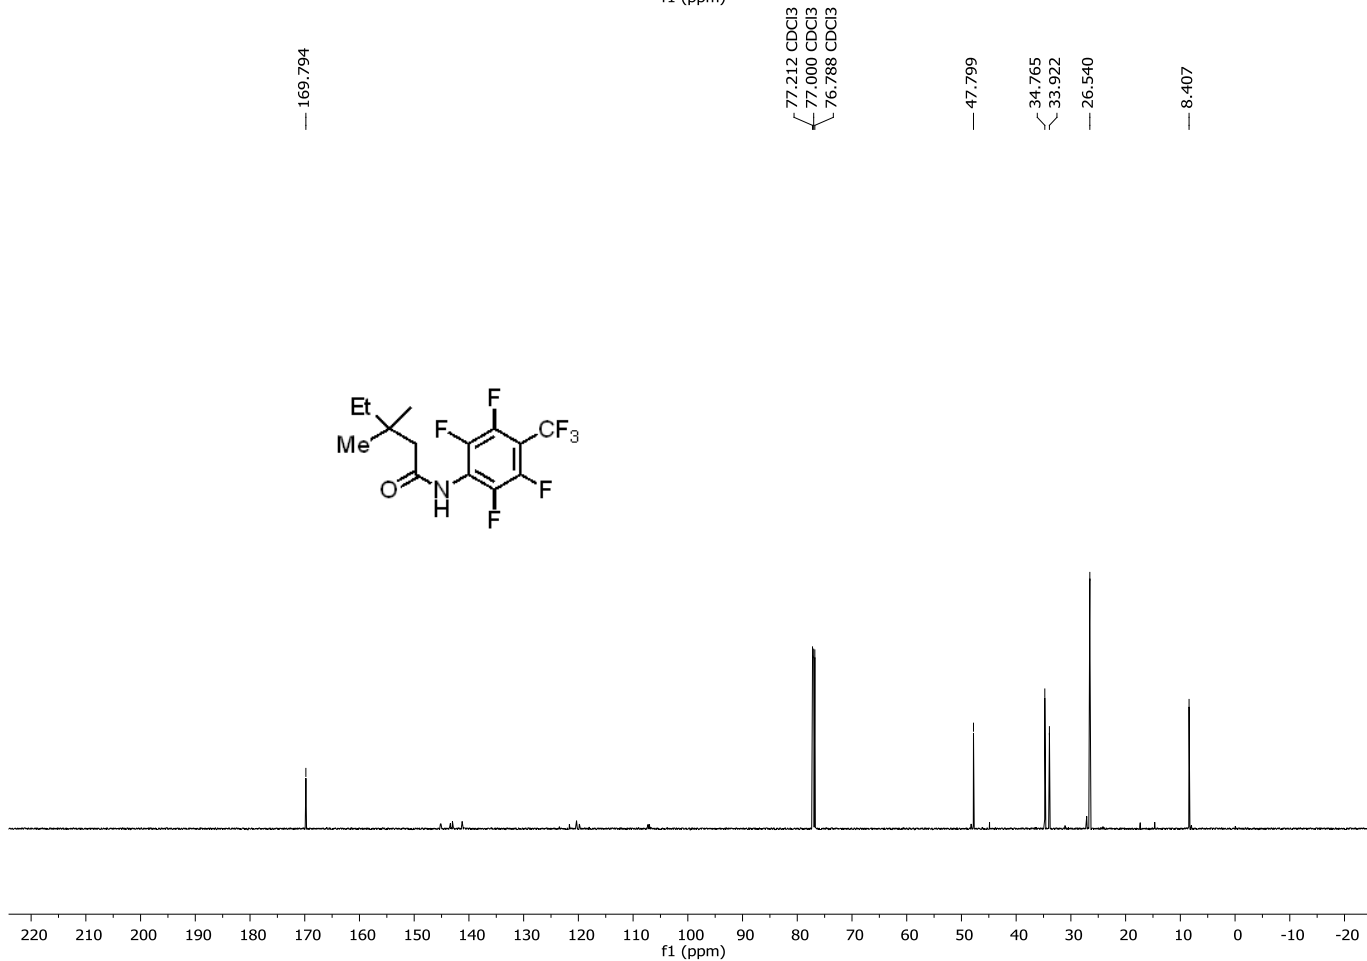



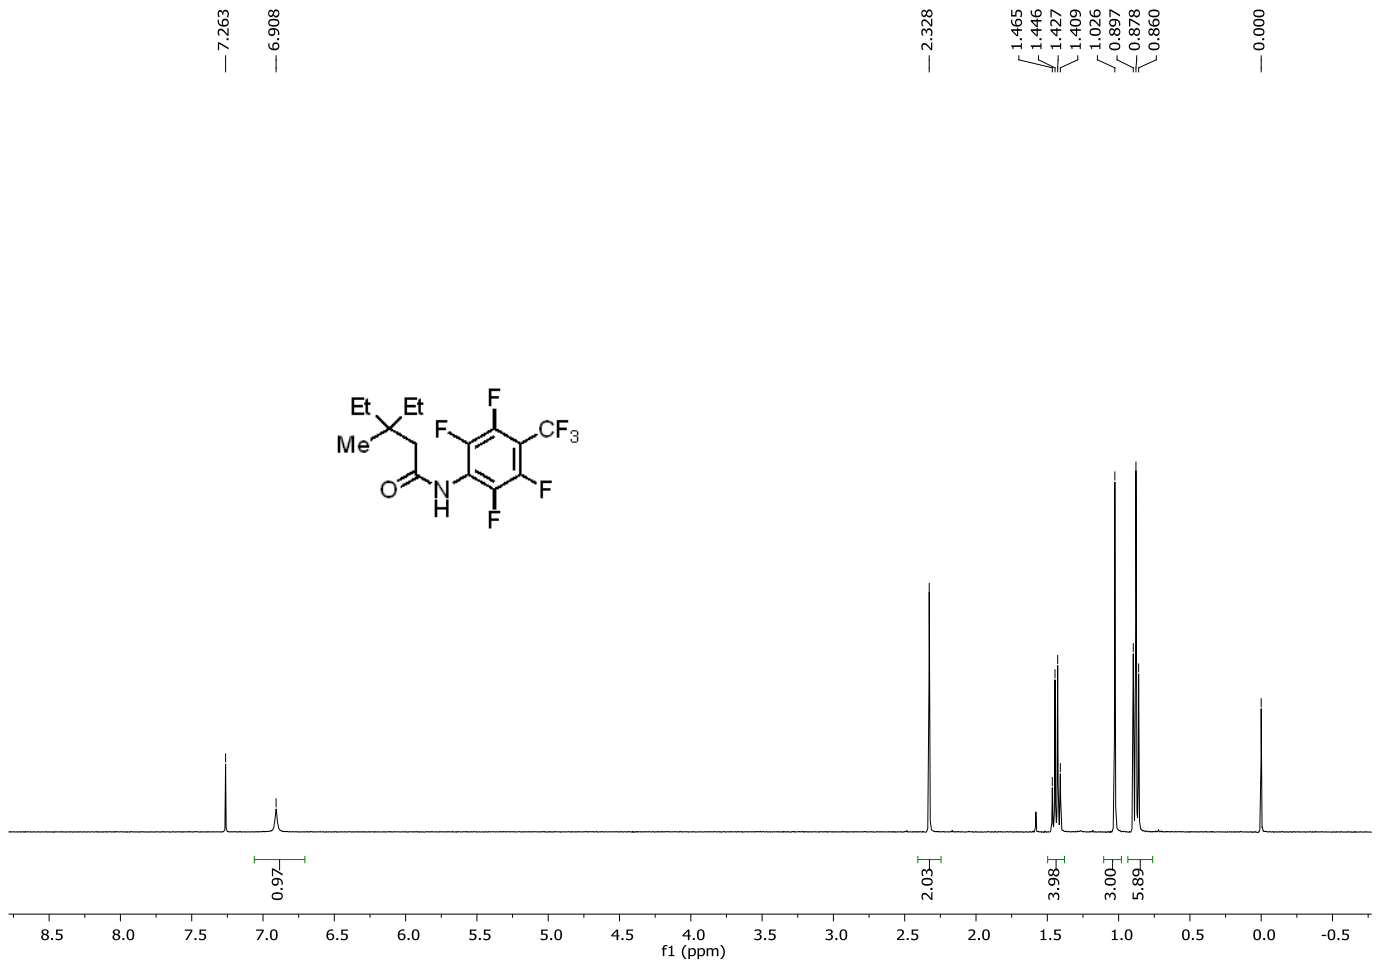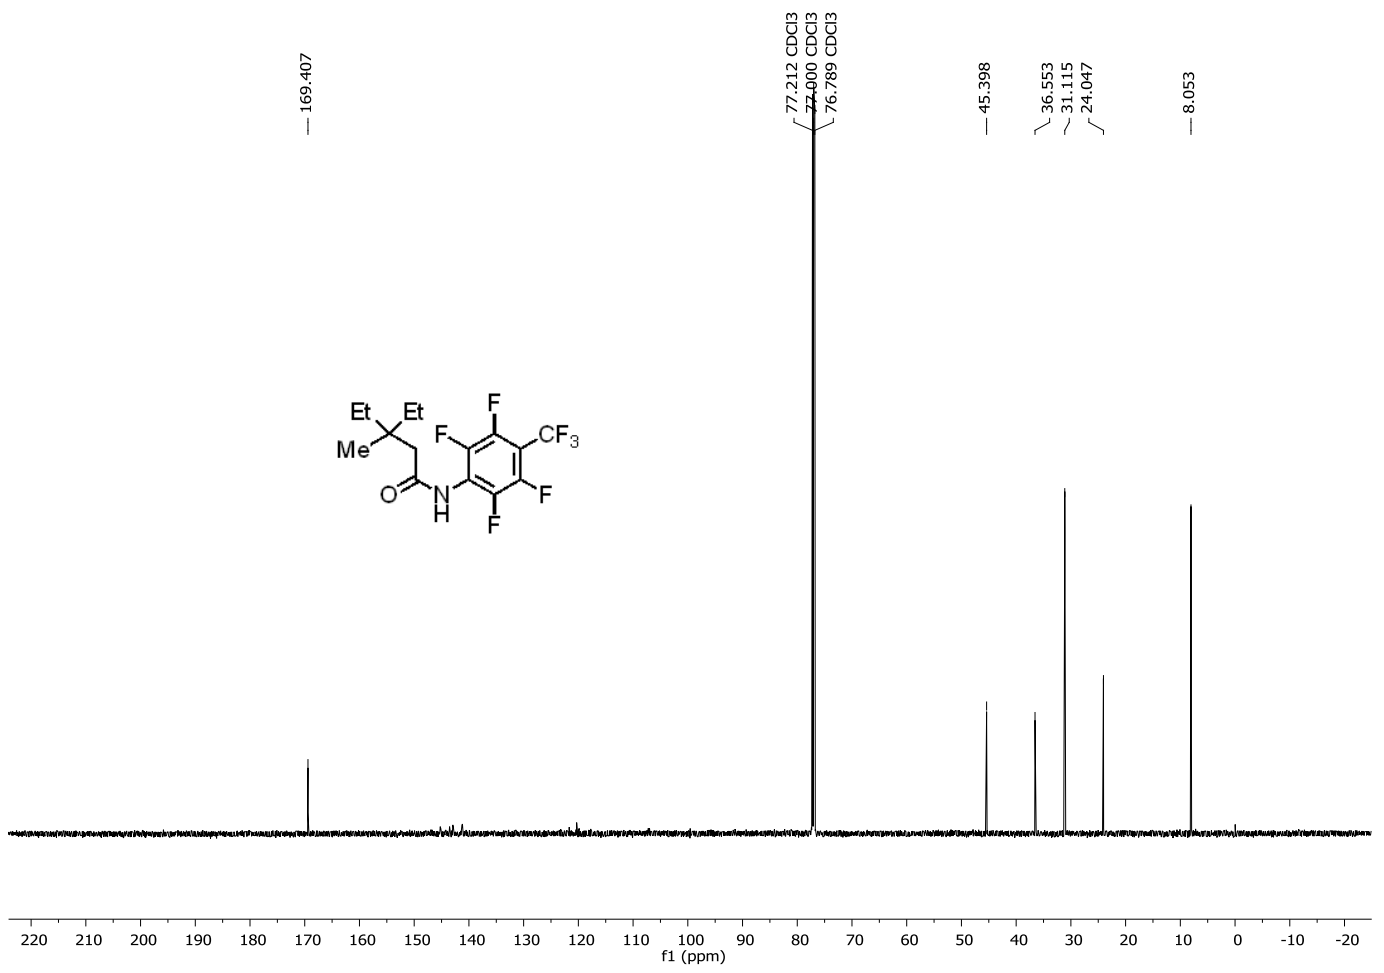

7.312  
7.308  
7.304  
7.296  
7.291  
7.287  
7.276  
7.273  
7.270  
7.267  
7.257  
7.251  
7.247  
7.243  
7.229  
7.211  
7.205  
7.201  
7.195  
7.188  
7.184  
7.181  
7.010

2.805  
2.772  
2.720  
2.687  
2.335  
2.299  
2.271  
2.235  
1.599  
1.536  
1.533  
1.517  
1.511  
1.499  
1.492  
1.480  
1.474  
1.456  
1.037  
1.001  
0.983  
0.964  
0.000

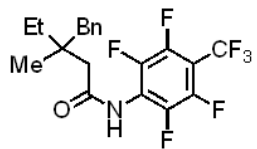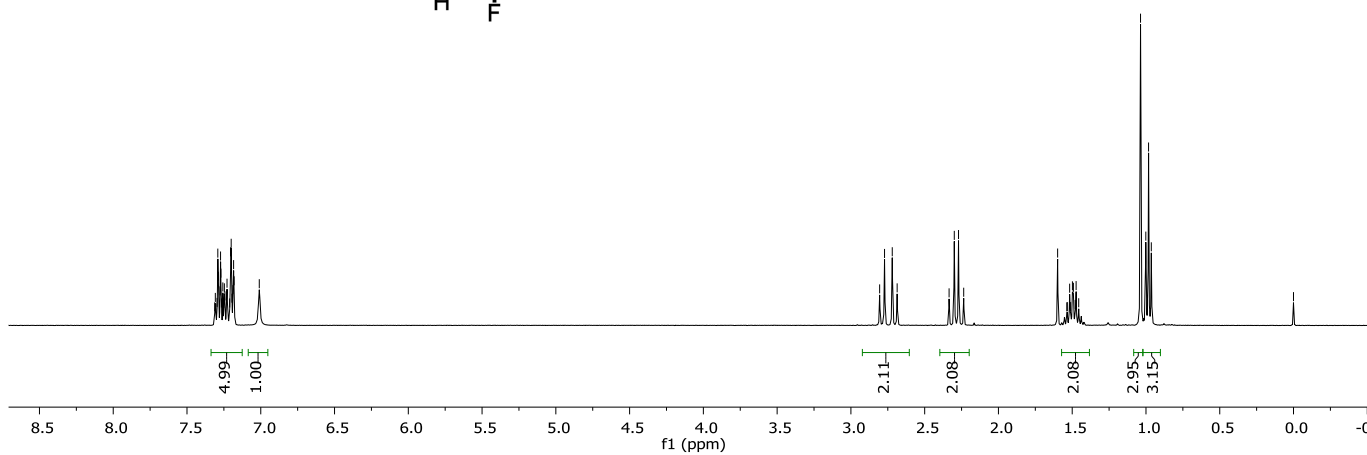

169.496  
138.125  
130.732  
127.964  
126.242  
77.211 CDCl3  
77.000 CDCl3  
76.788 CDCl3  
44.867  
44.328  
37.565  
31.724  
24.202  
8.355

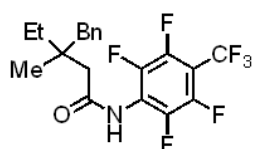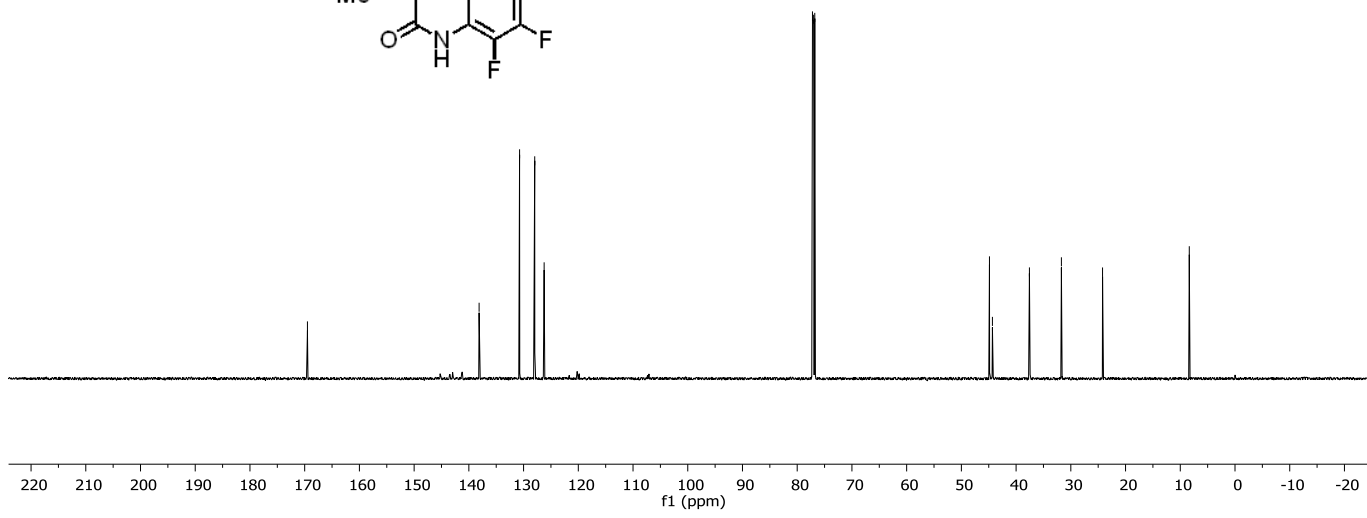

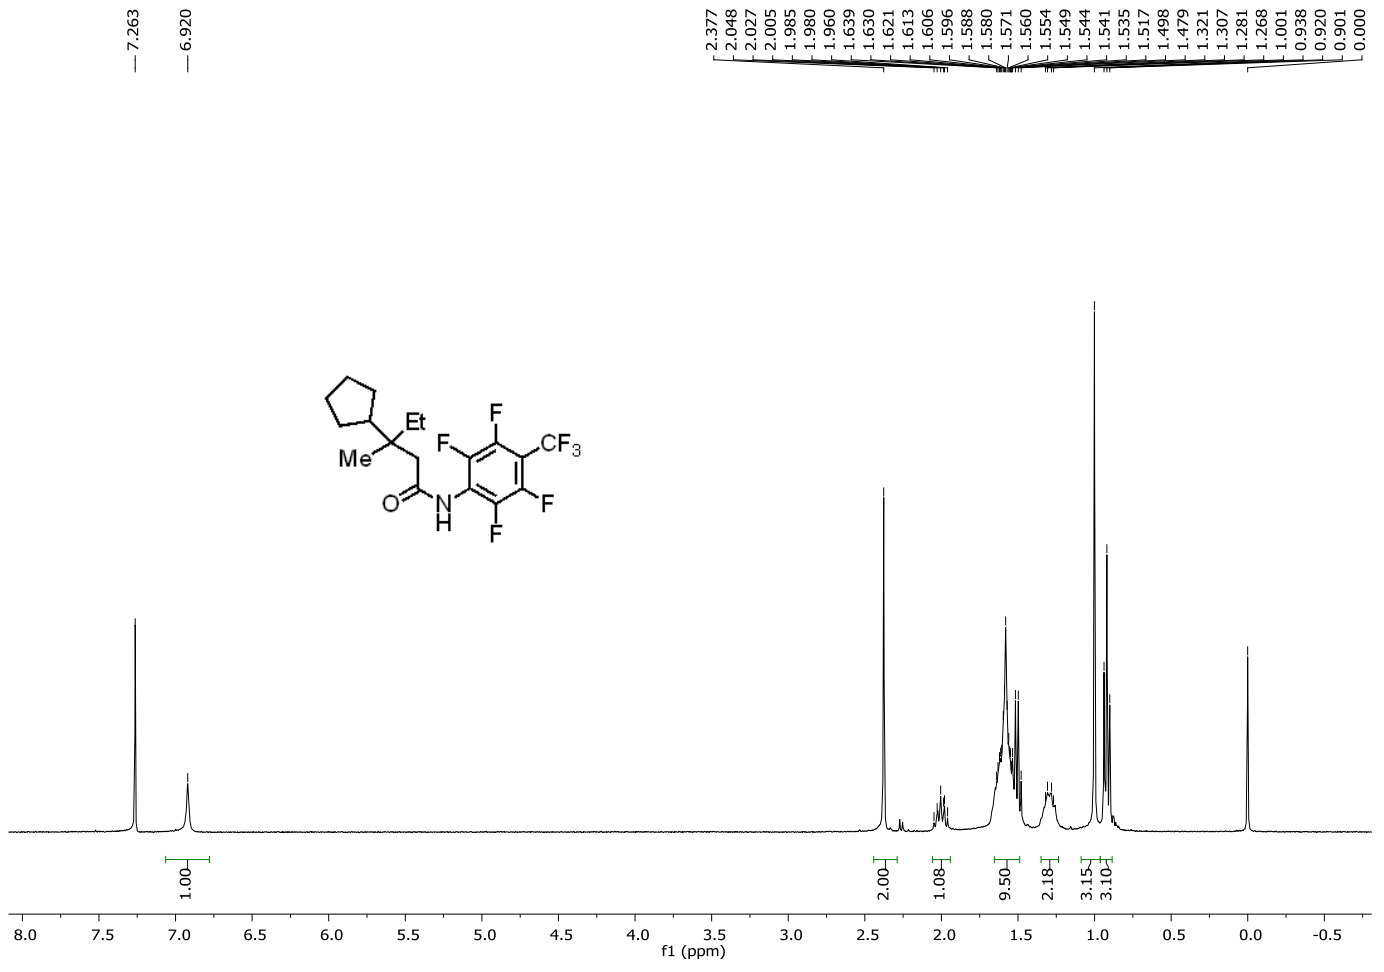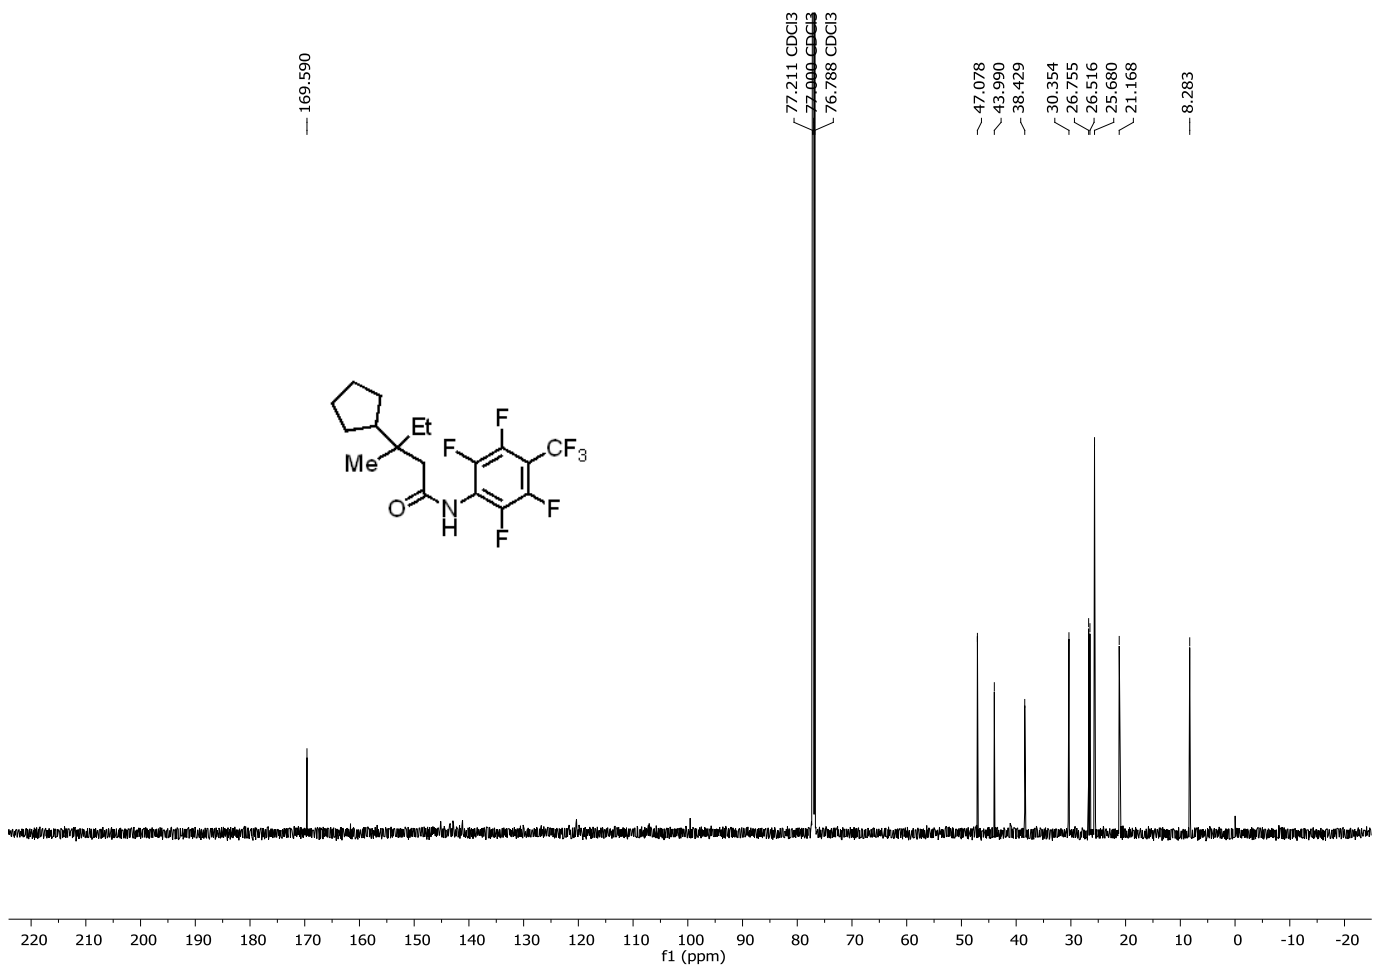

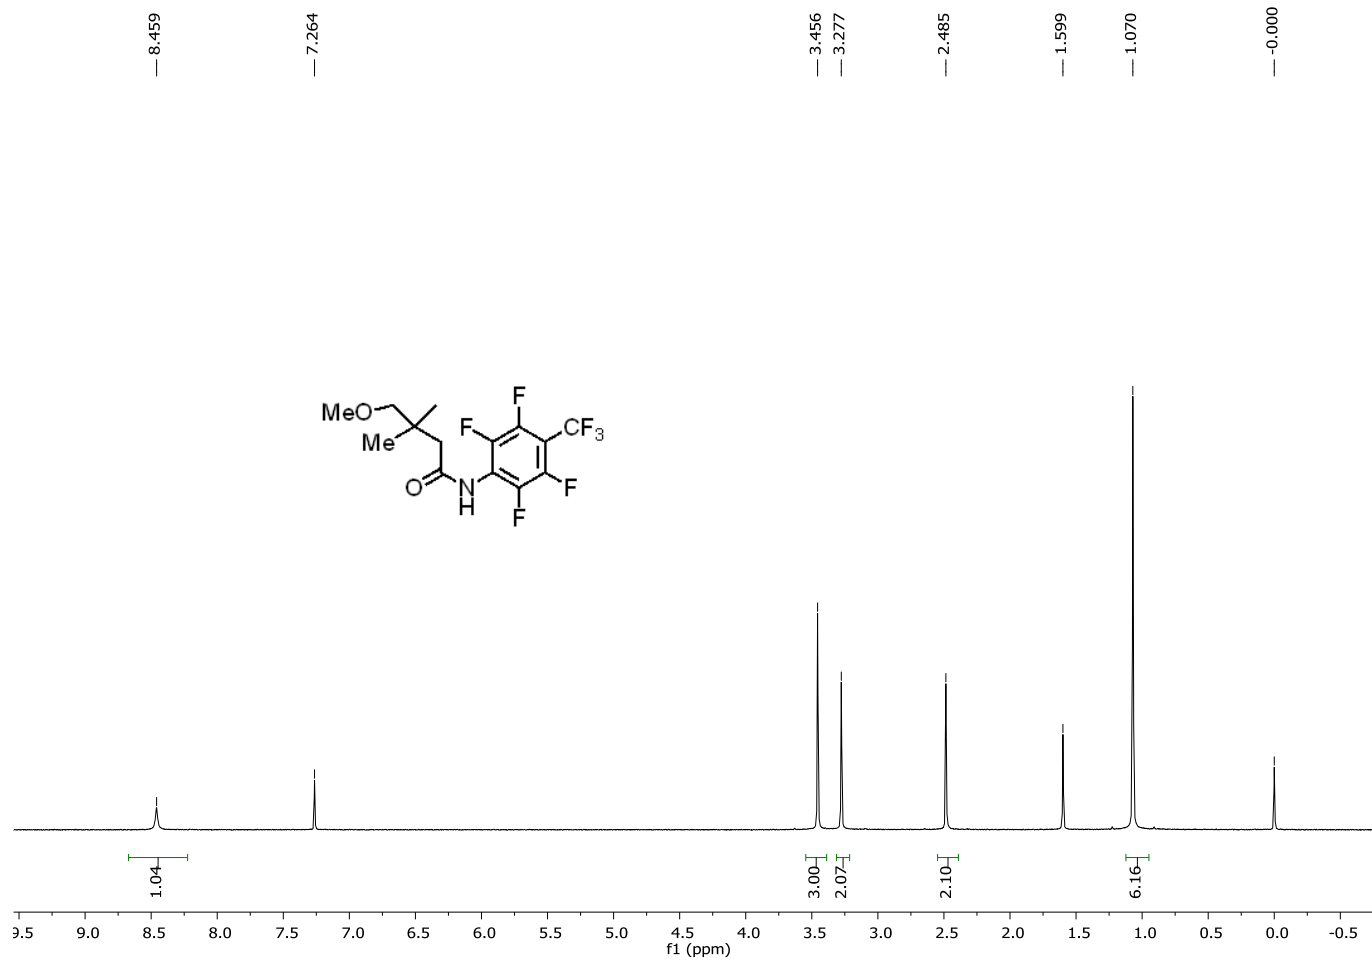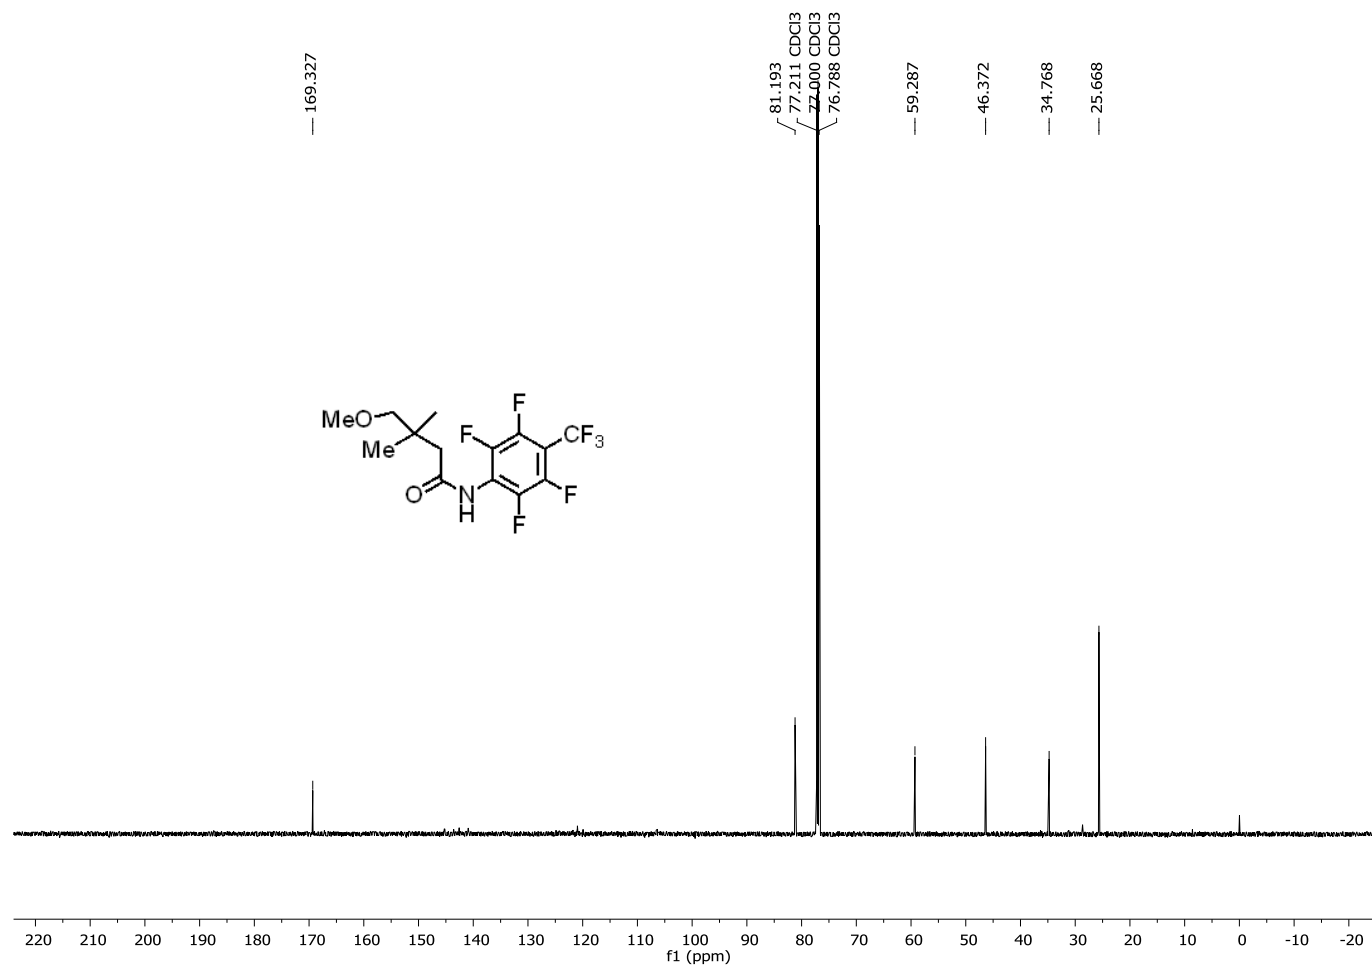

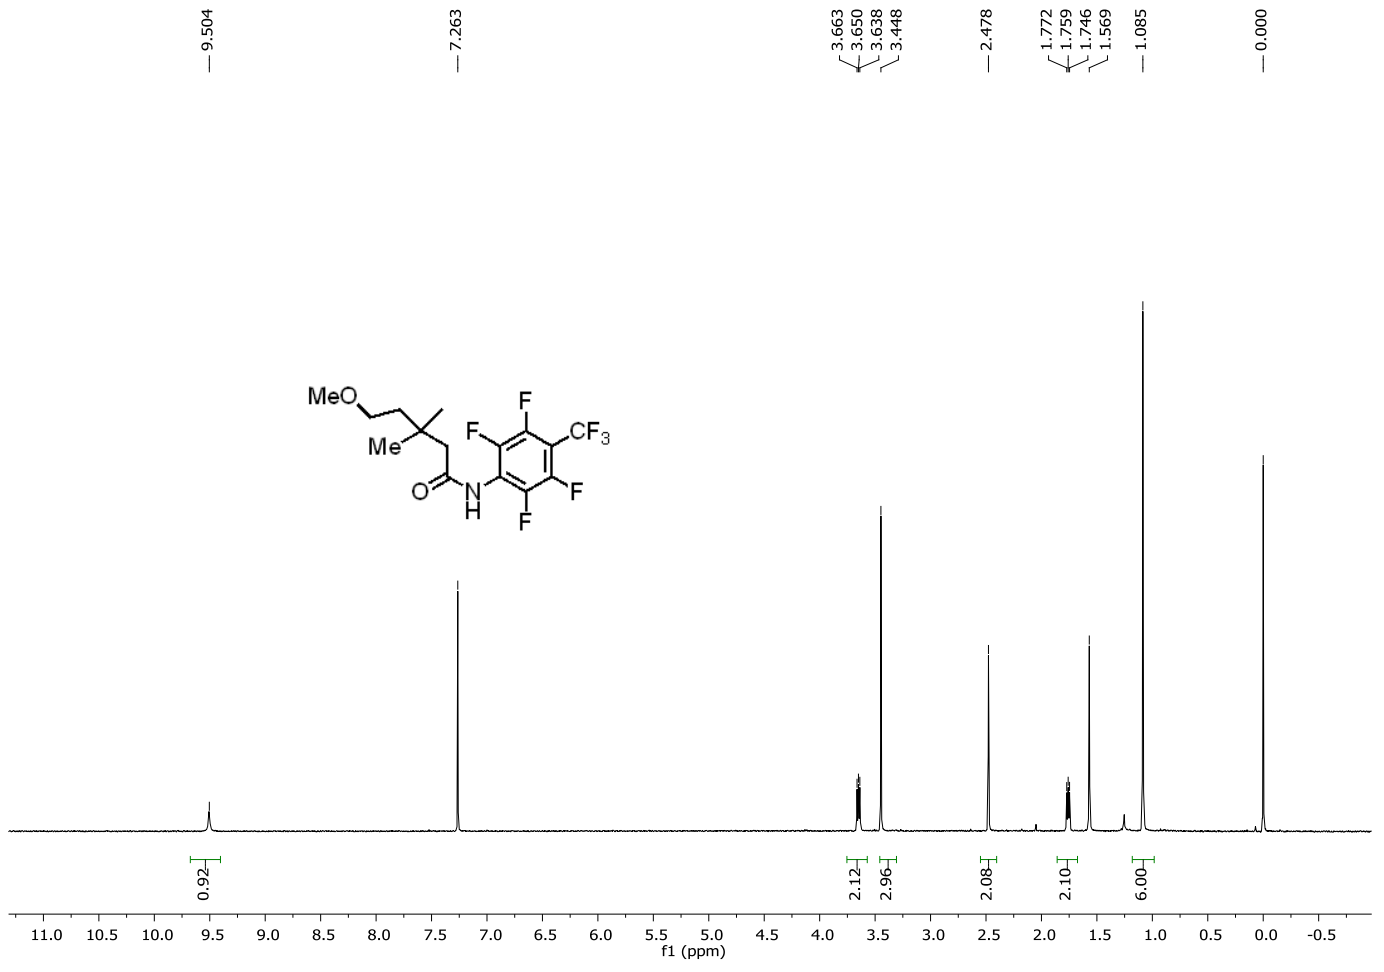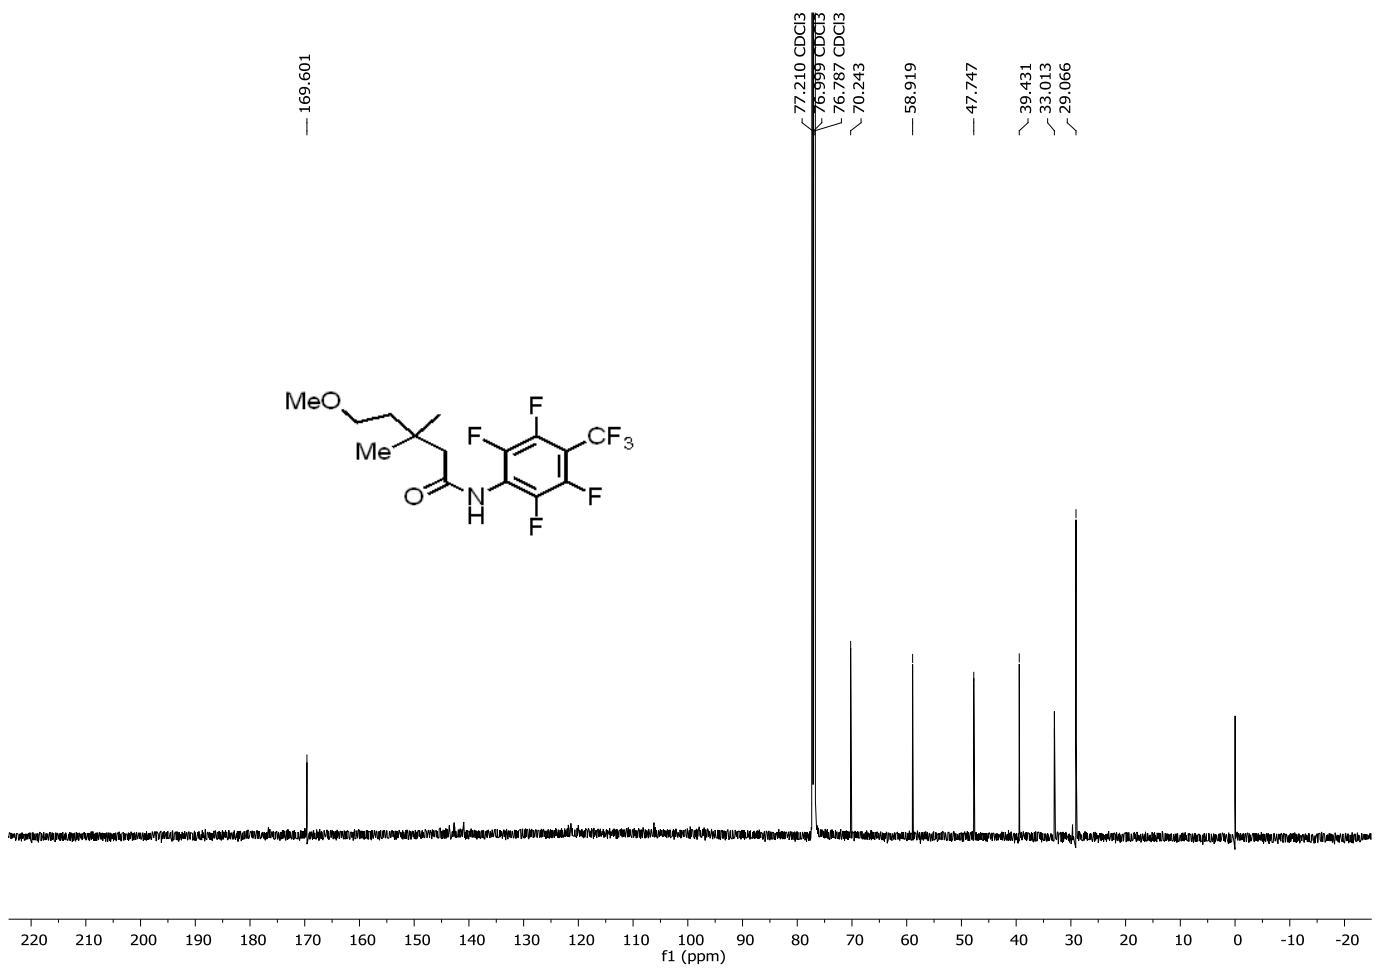

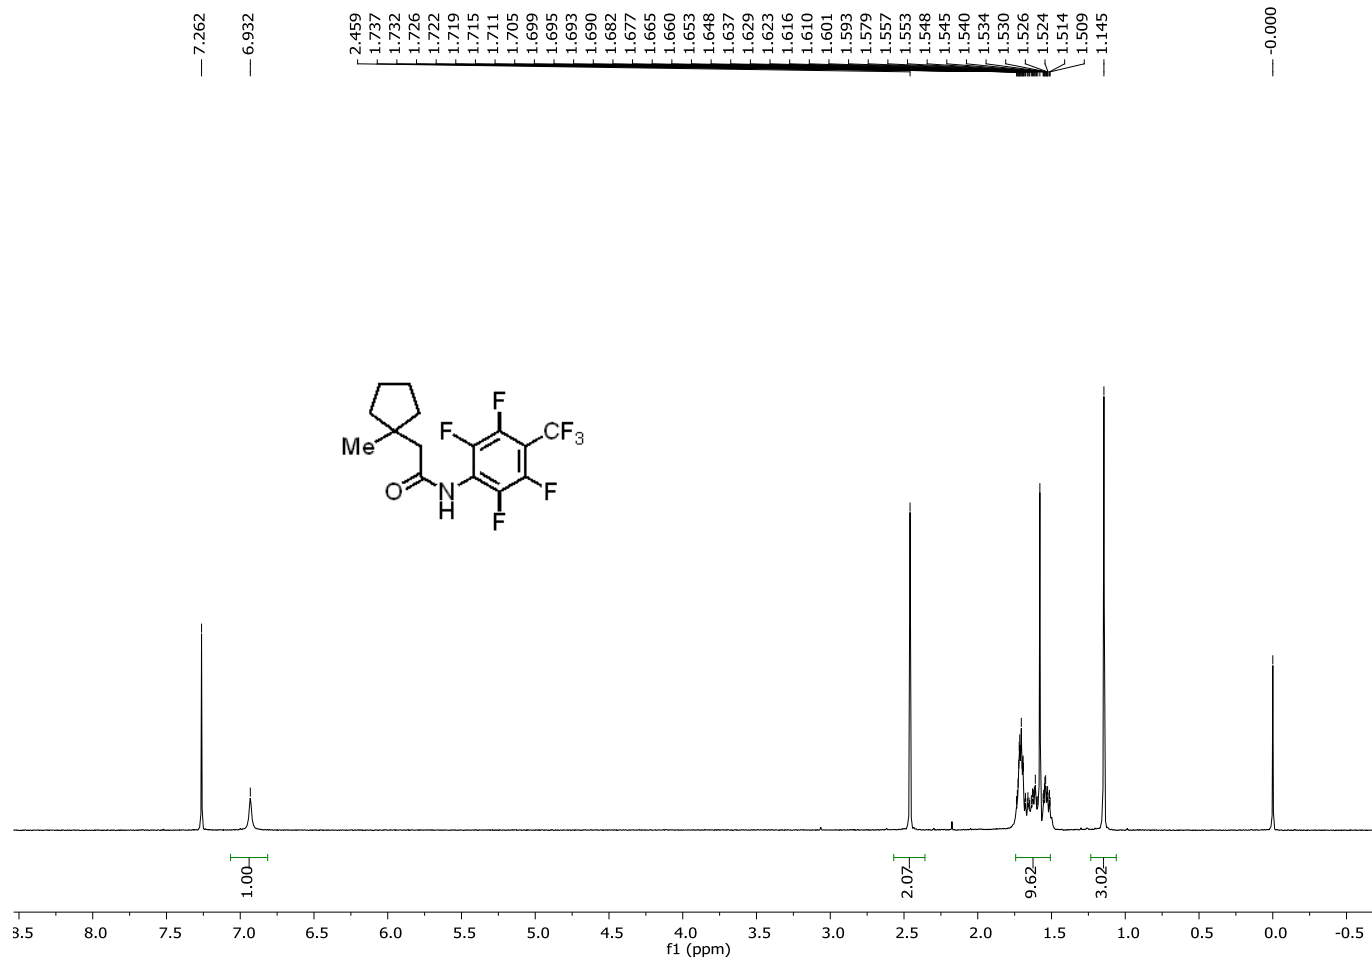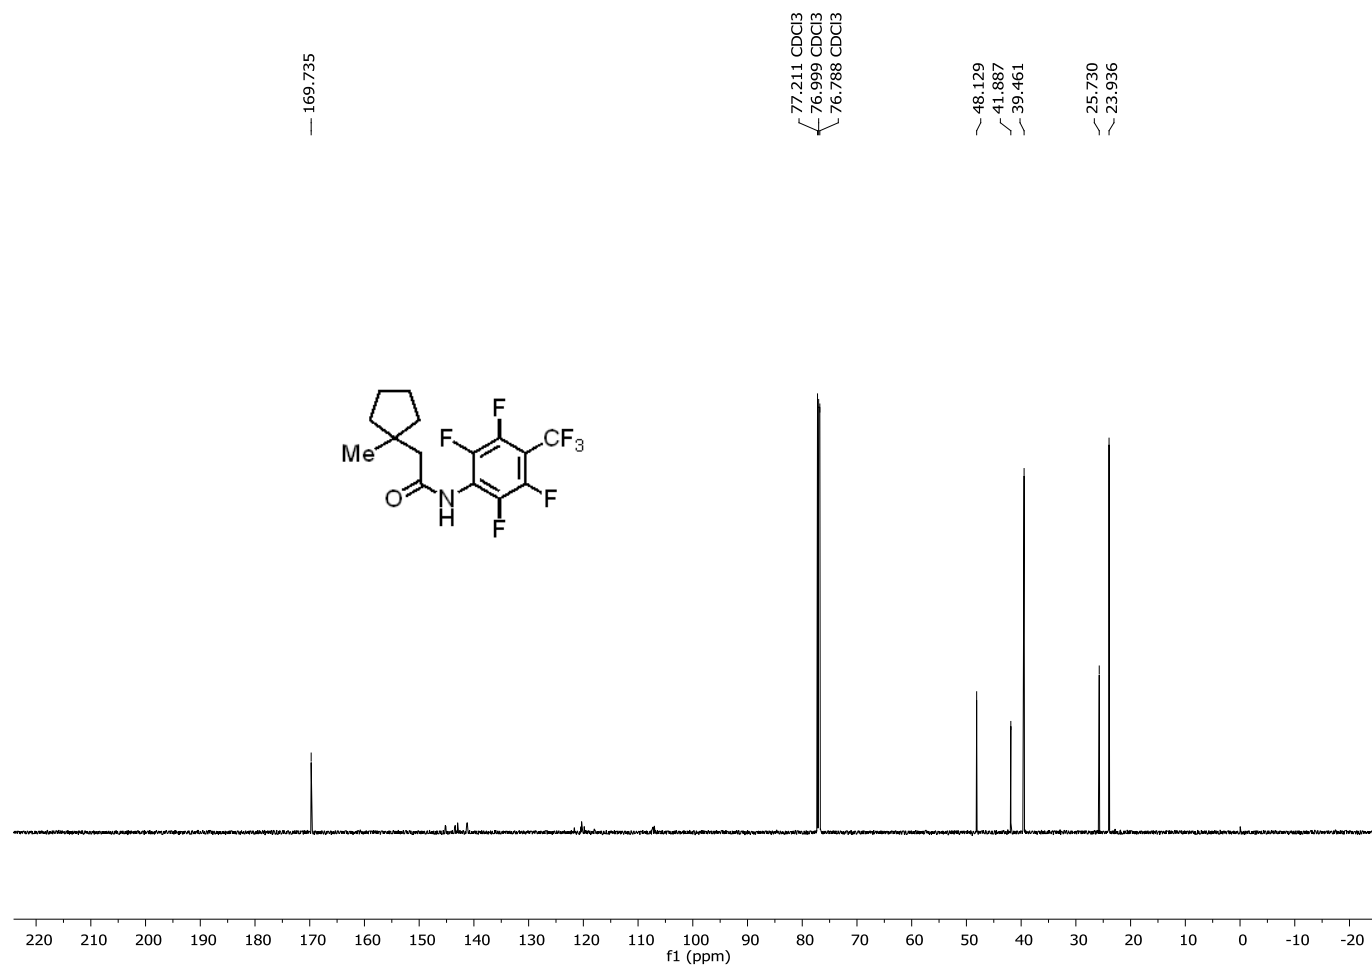

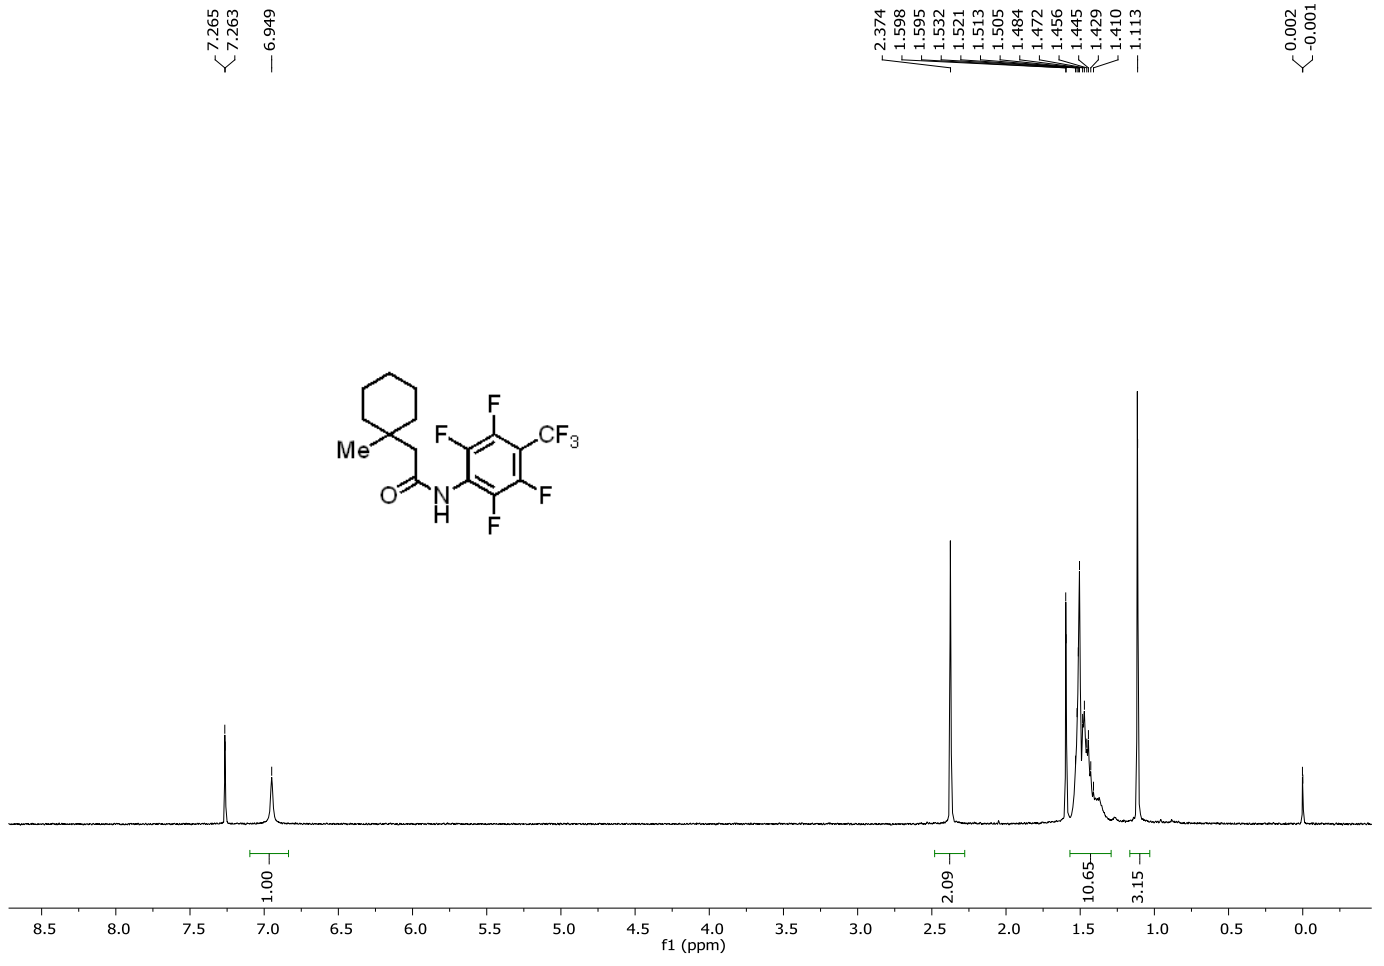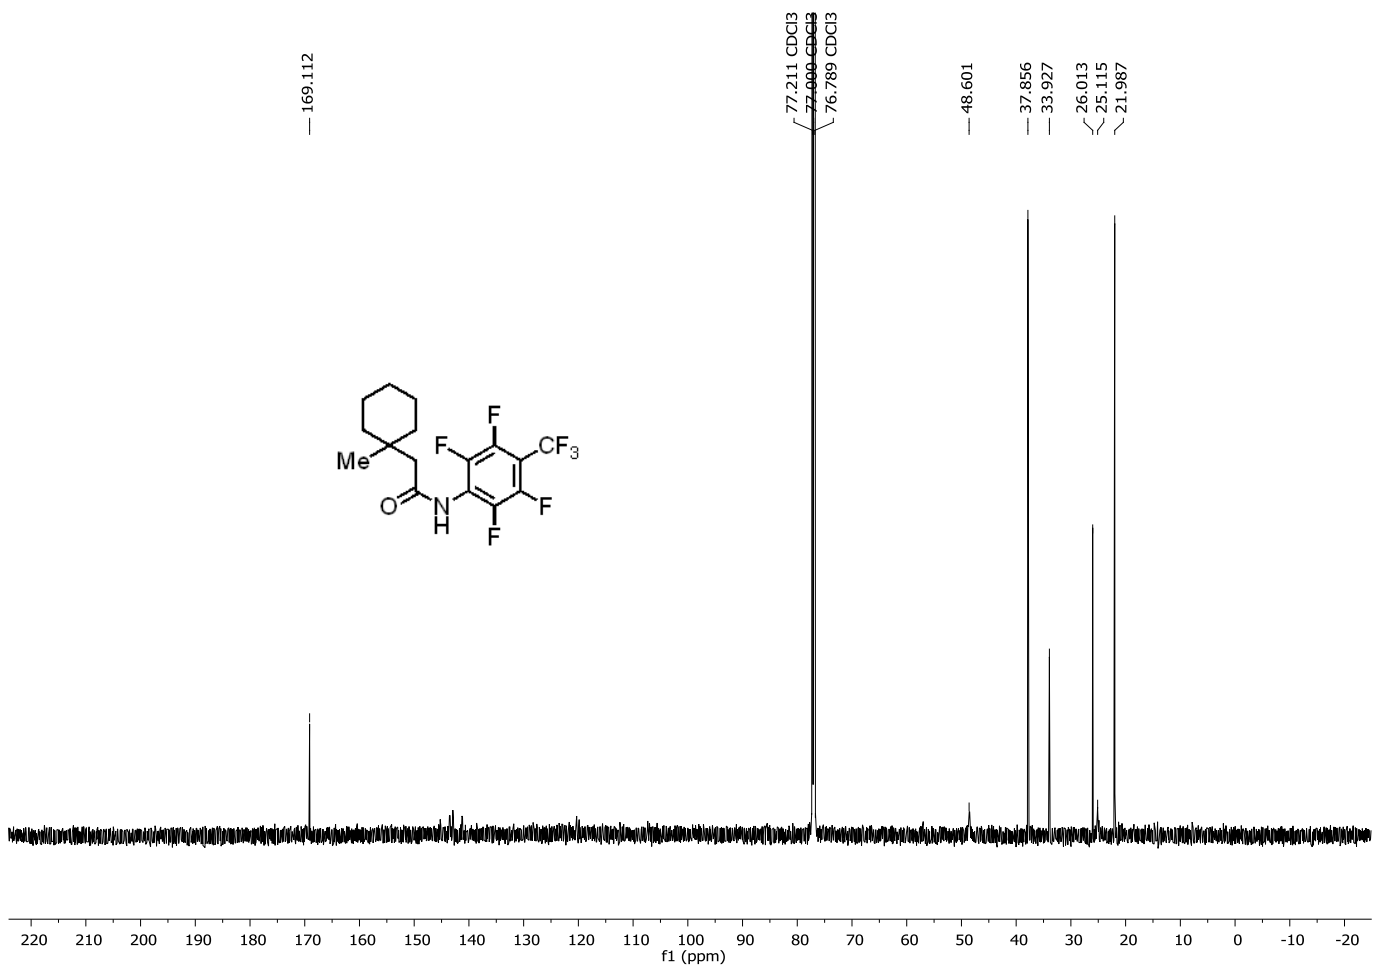

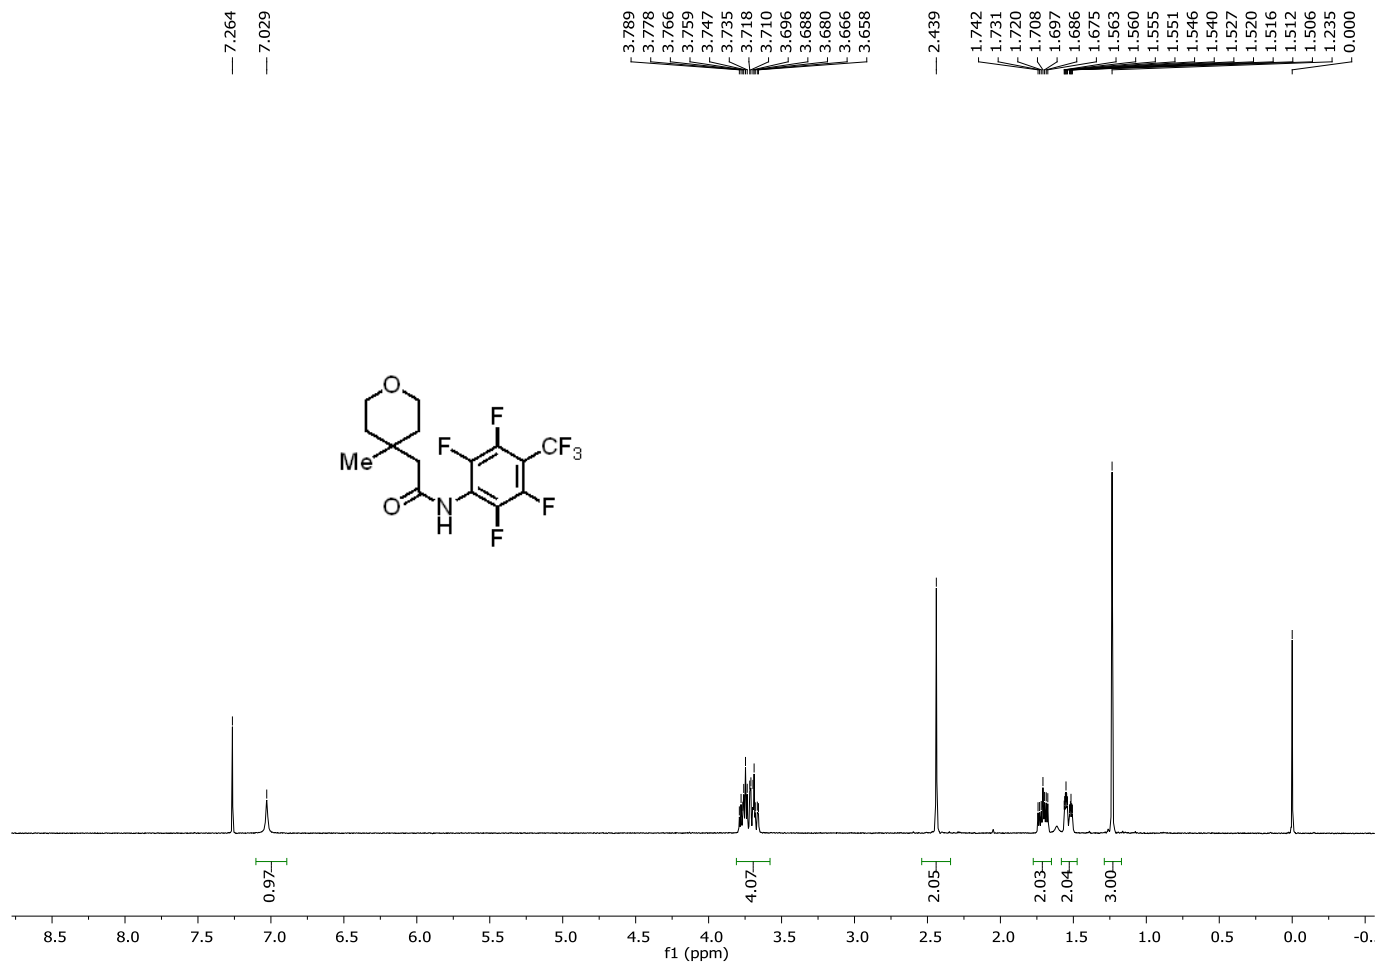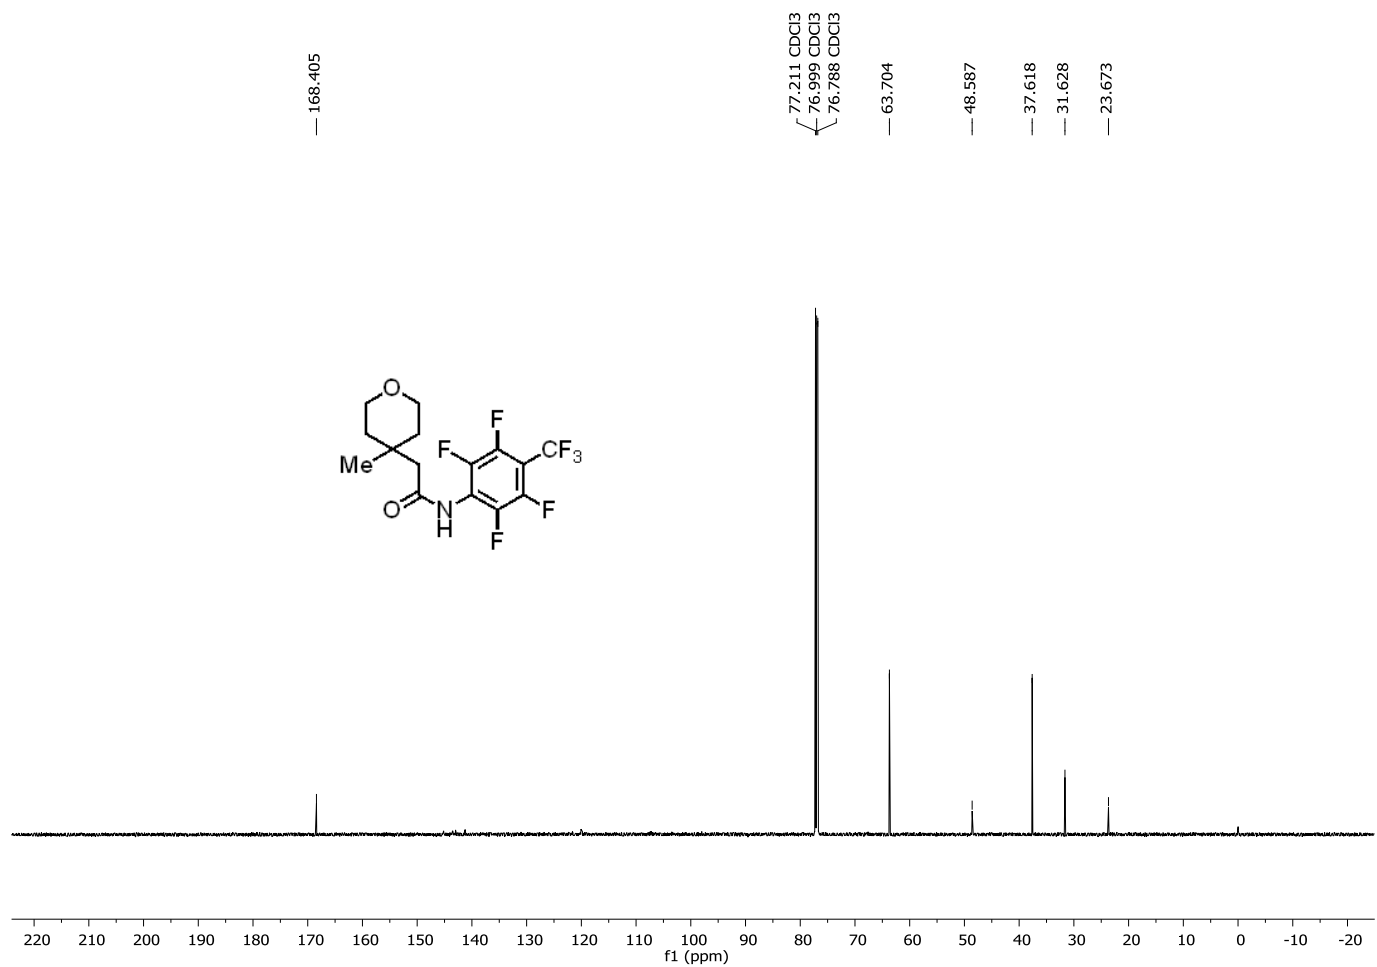



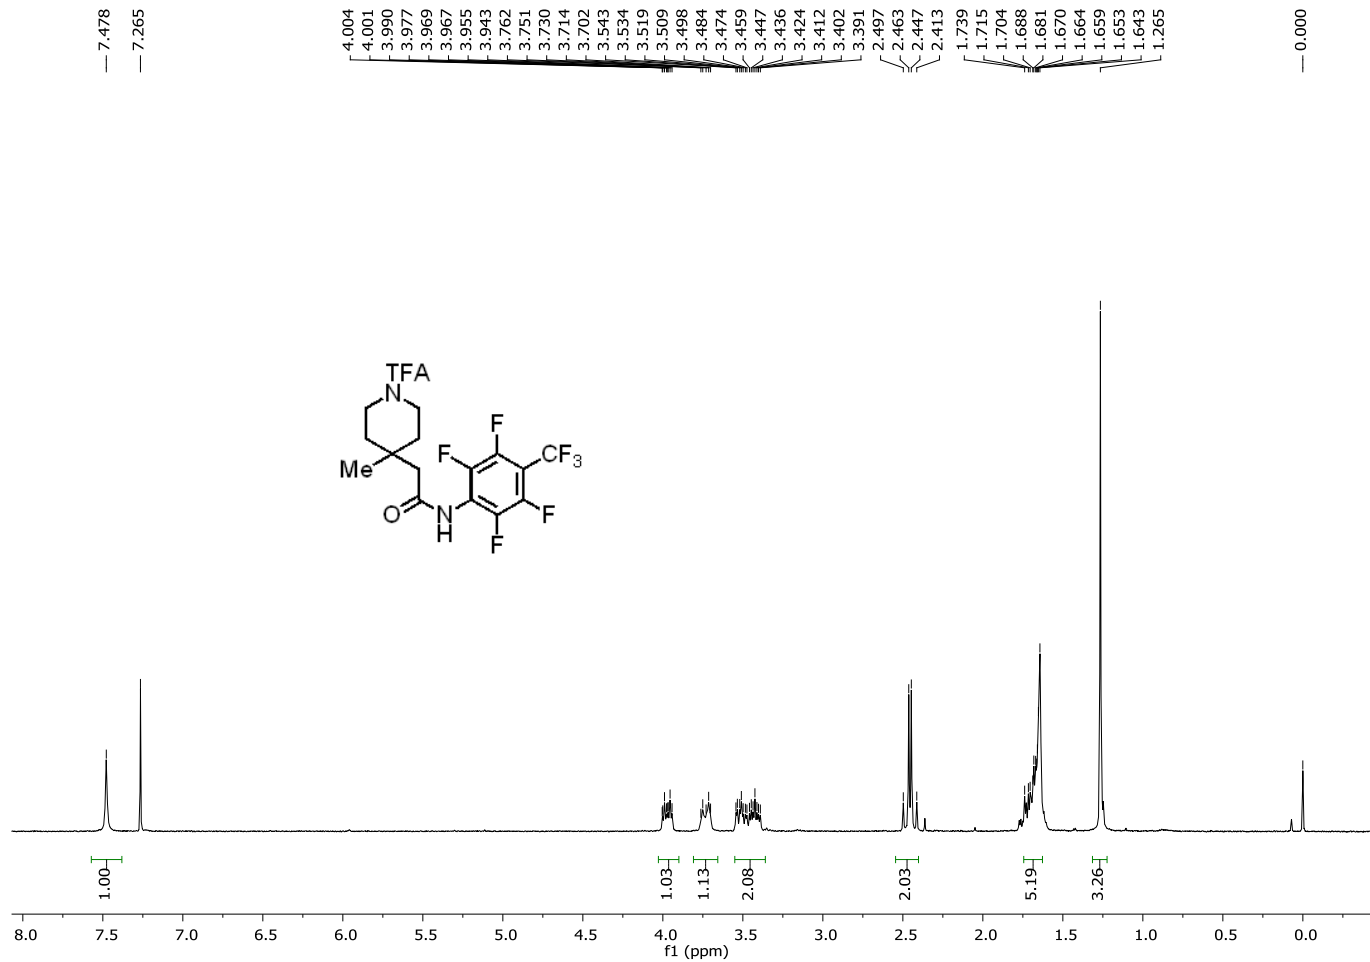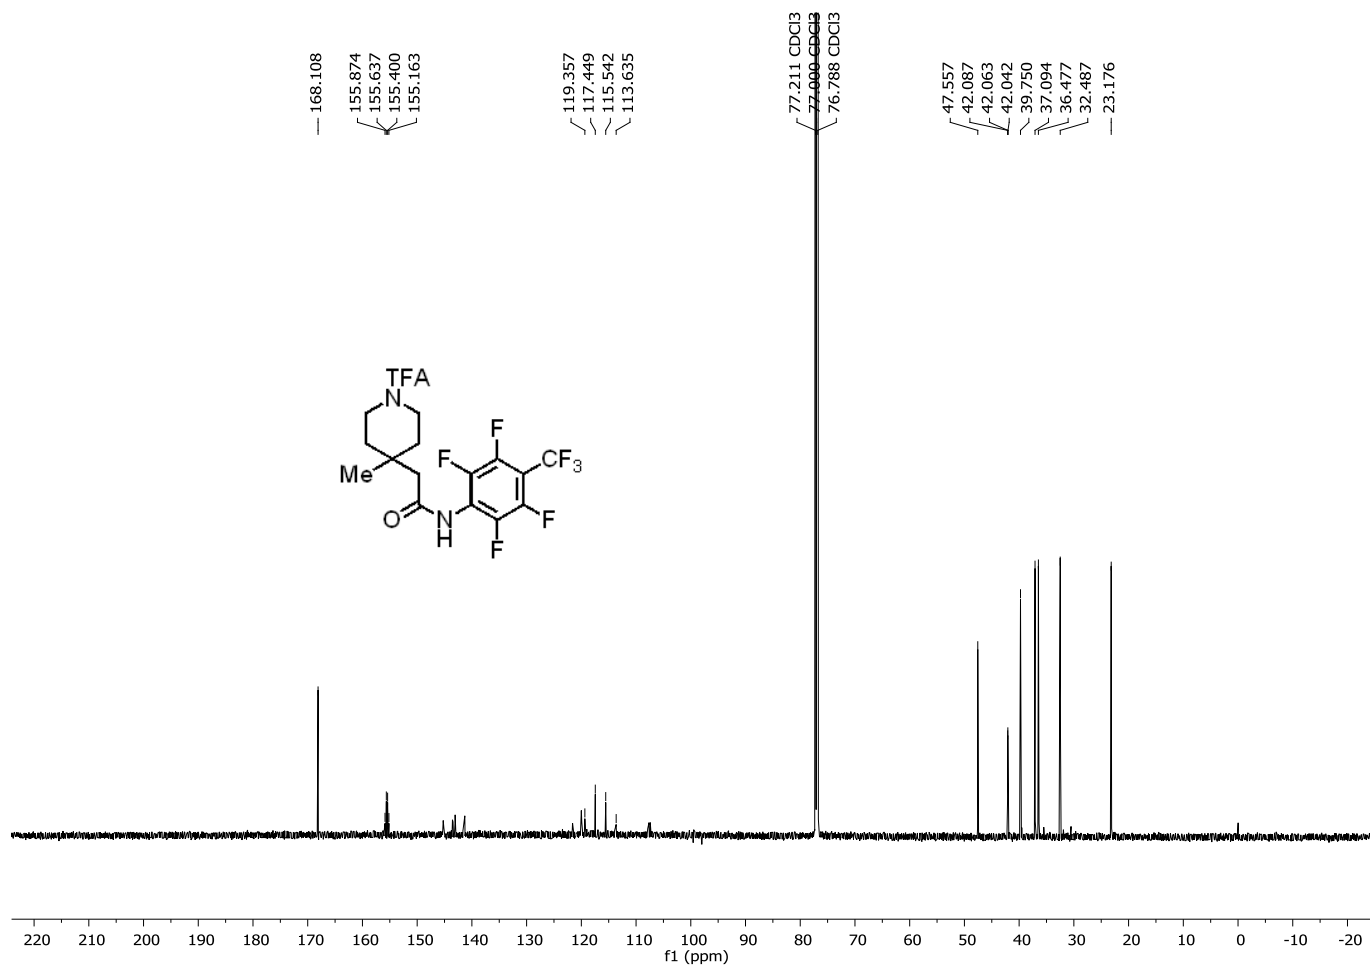

7.264

6.702

2.311

1.590

1.117

0.000

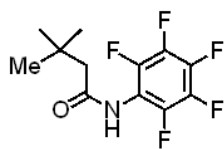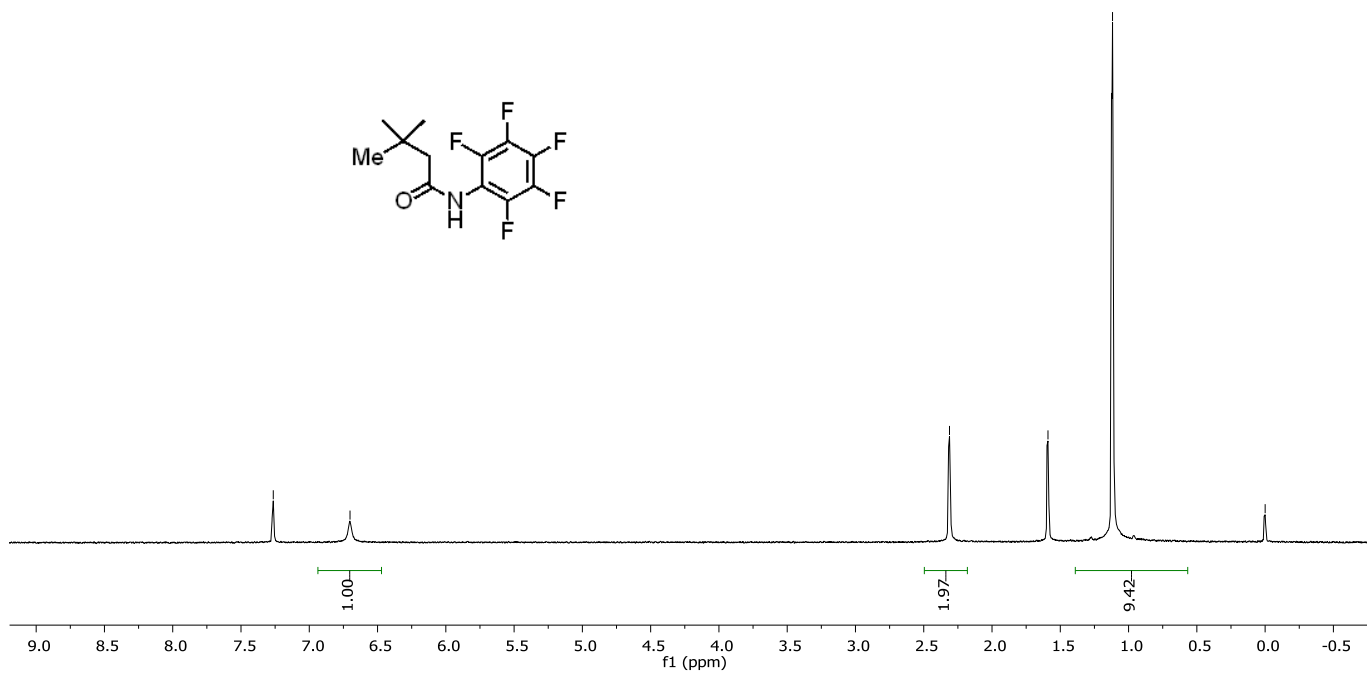

169.840

77.212 CDCl3  
77.000 CDCl3  
76.789 CDCl3

50.112

31.174  
29.658

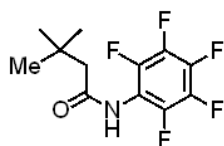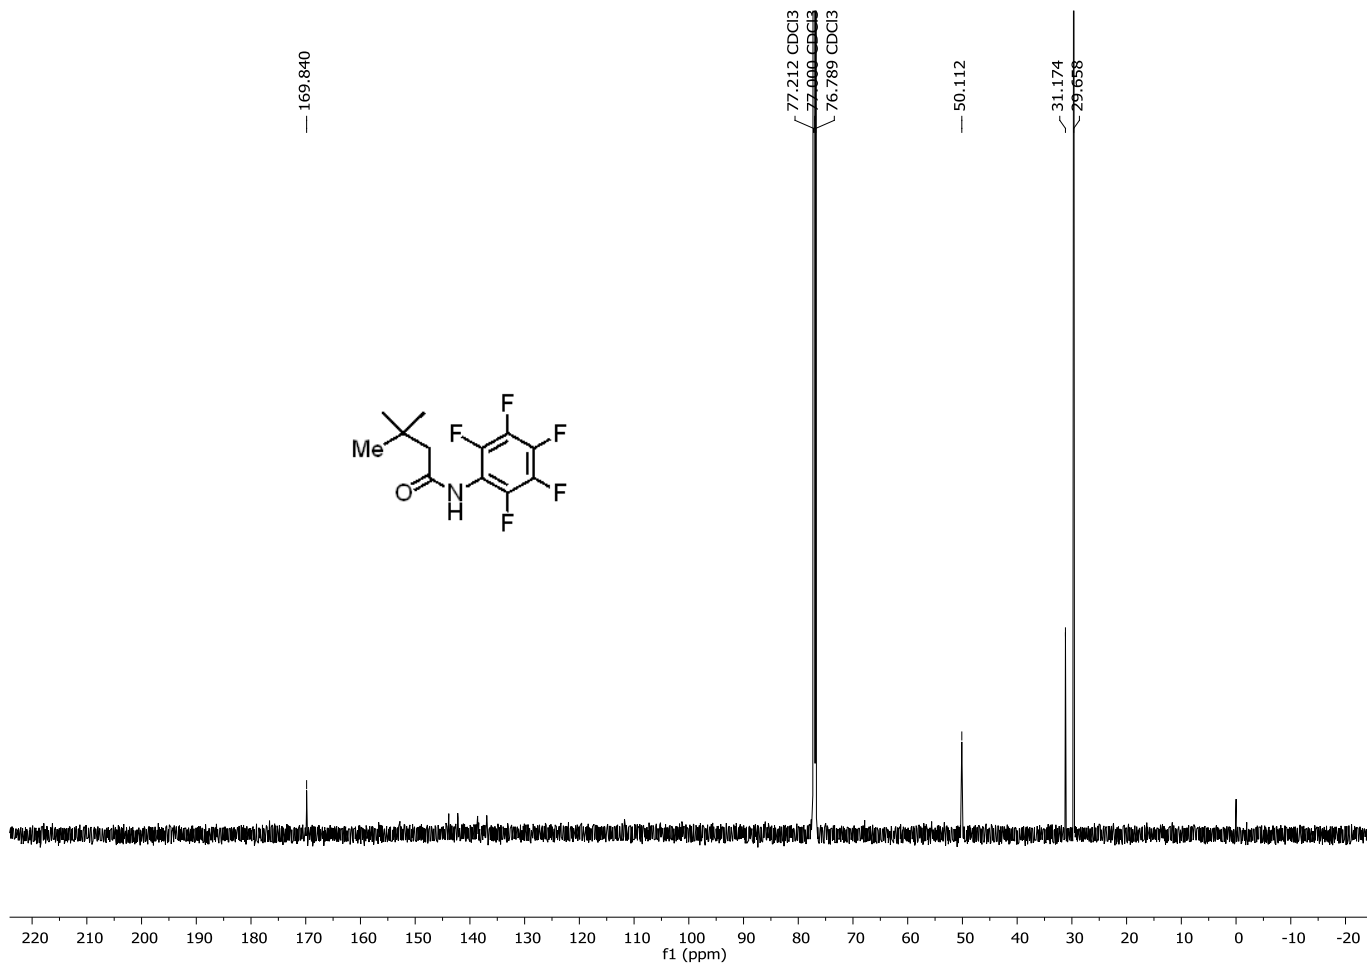

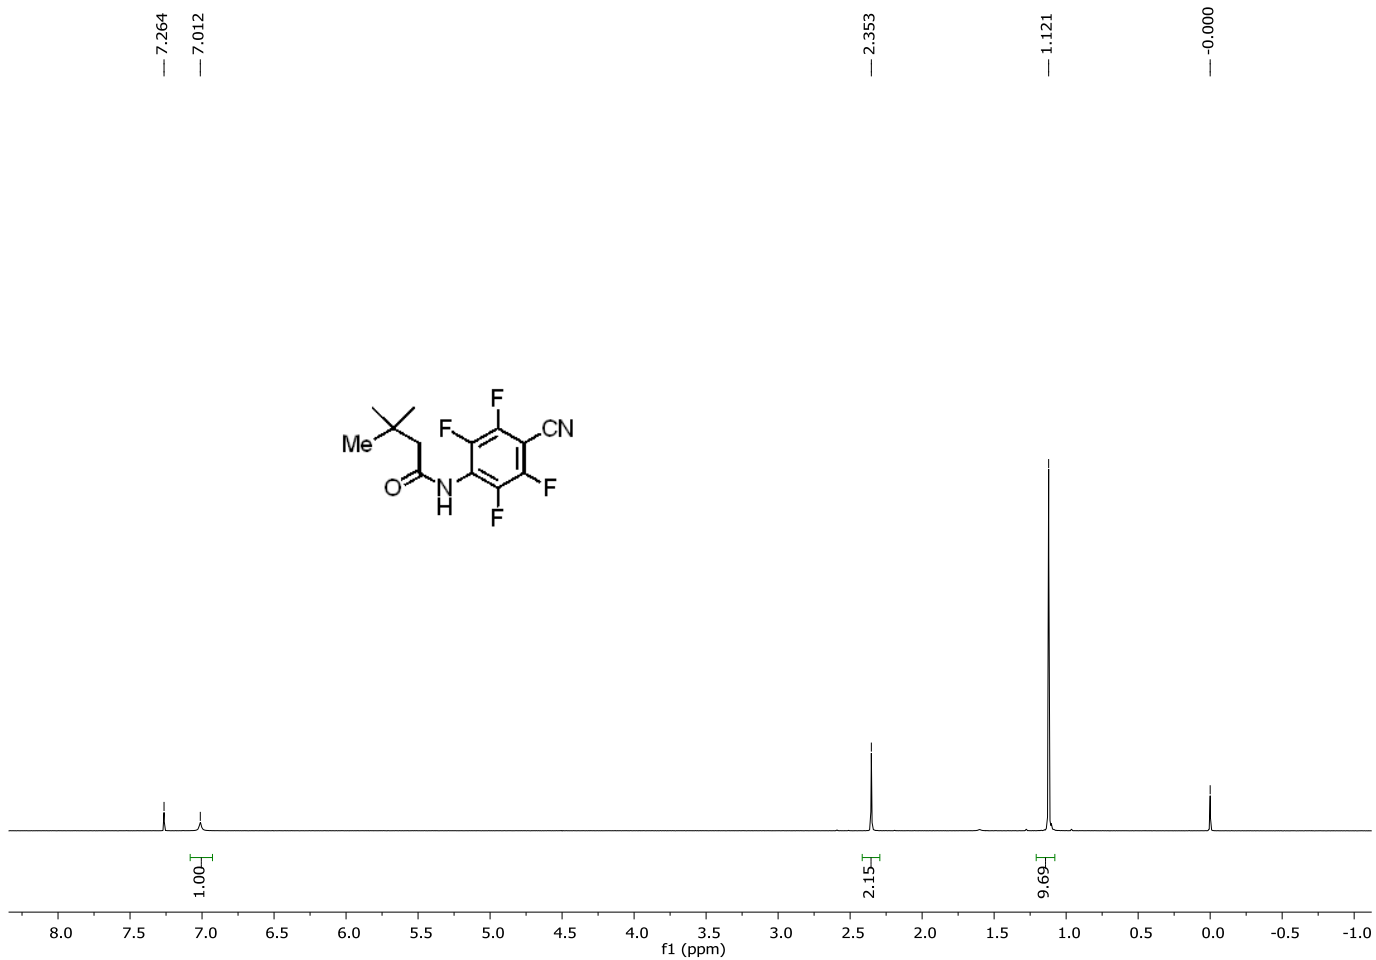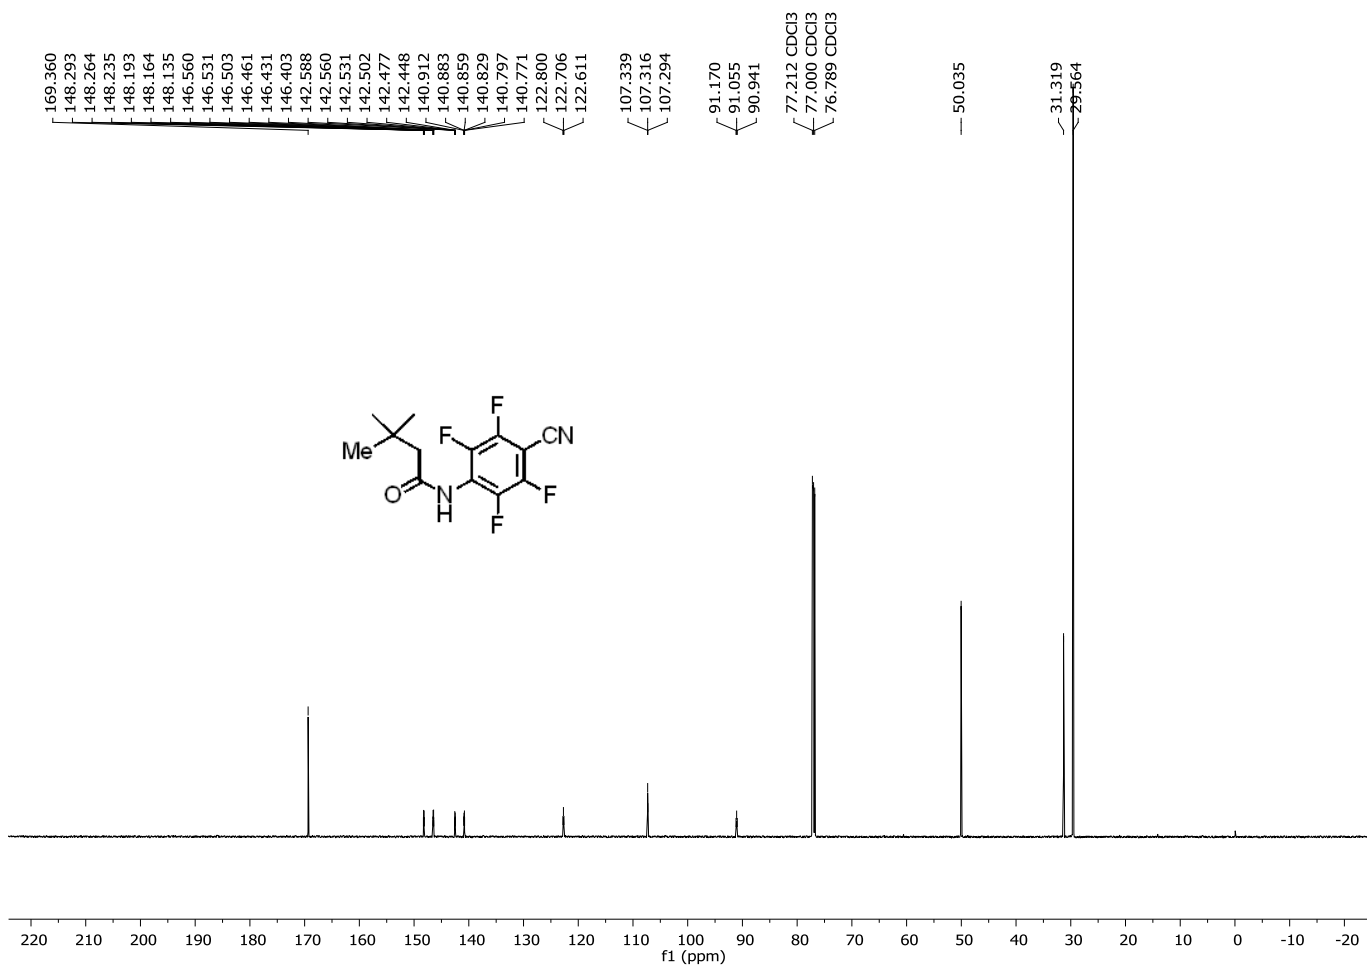

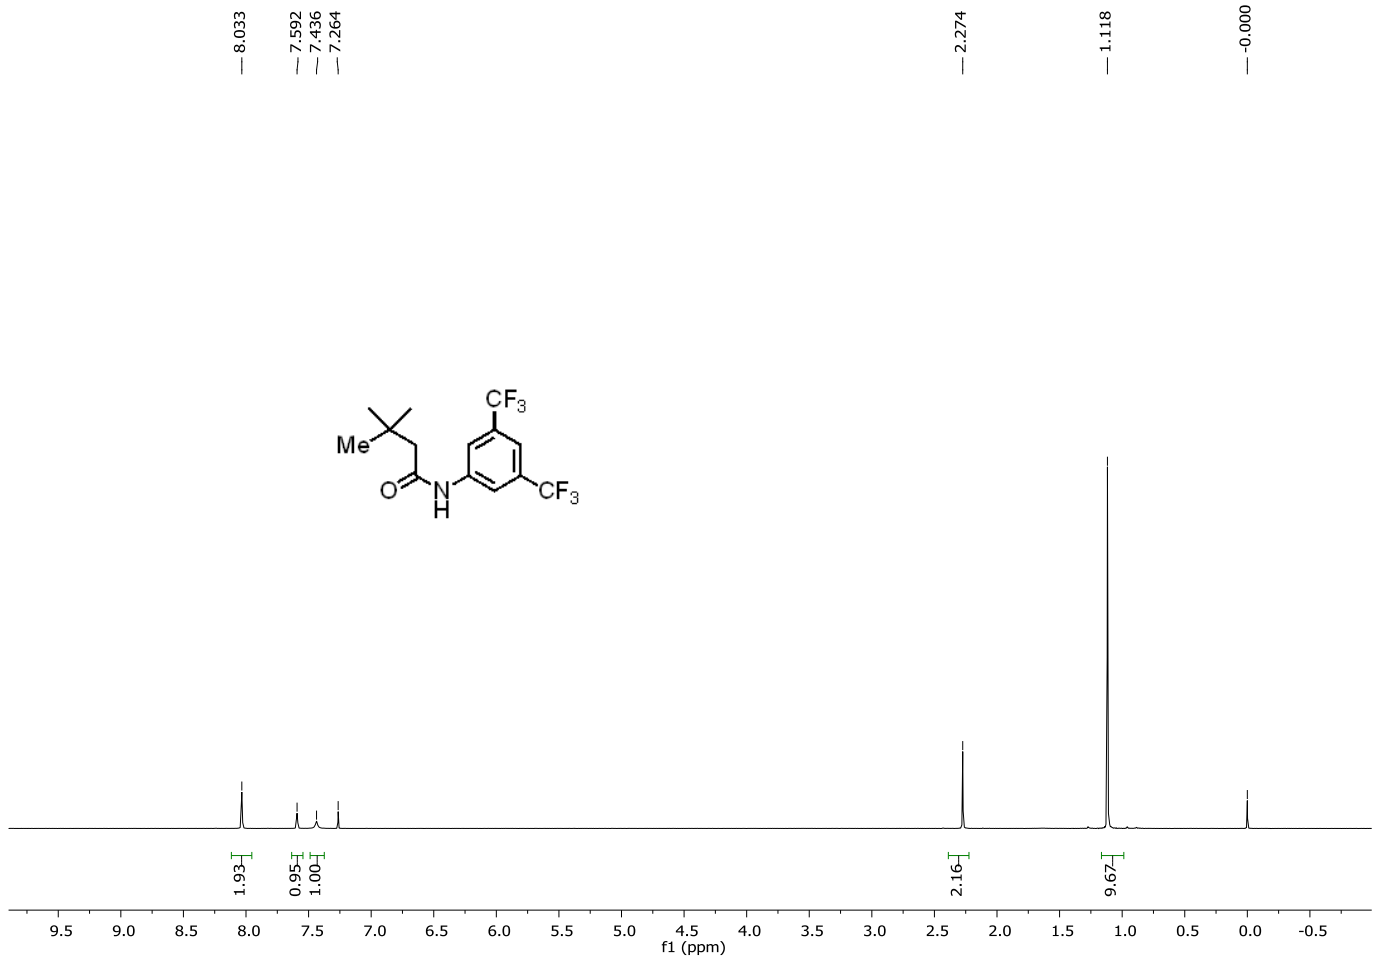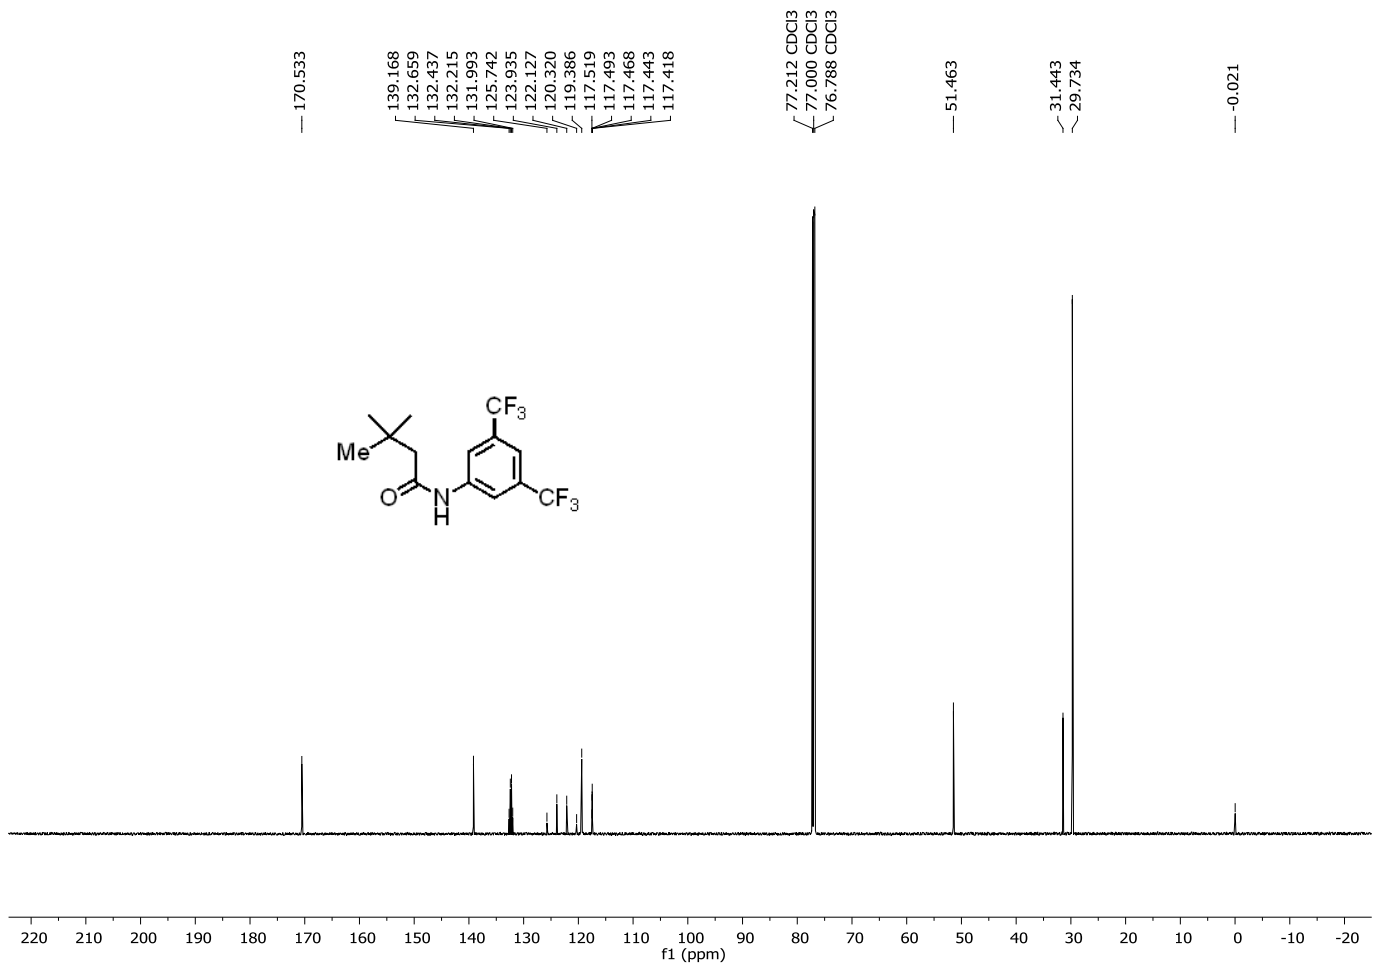

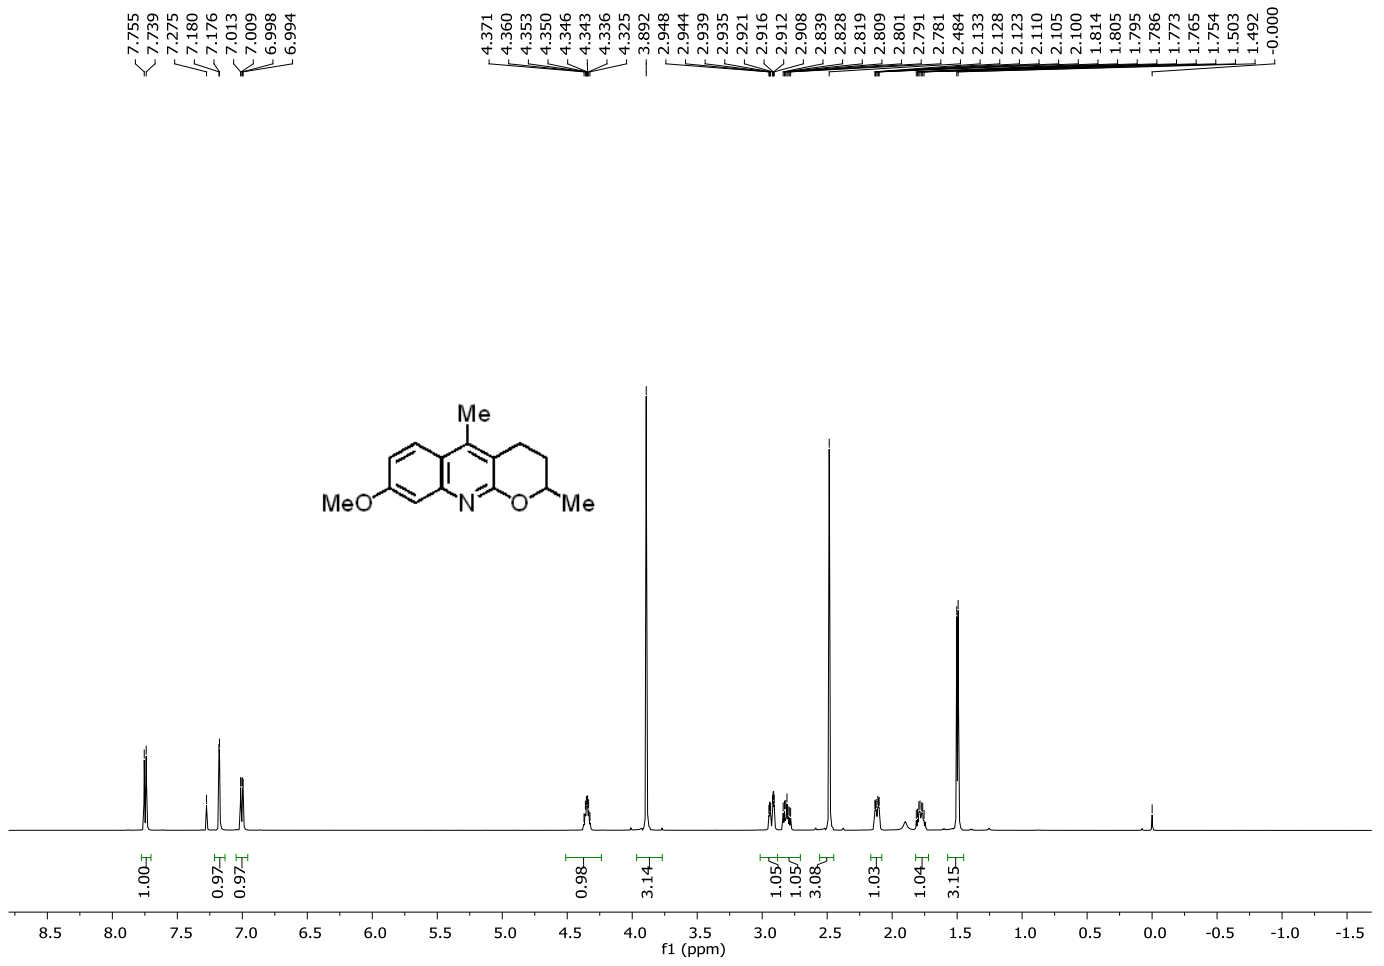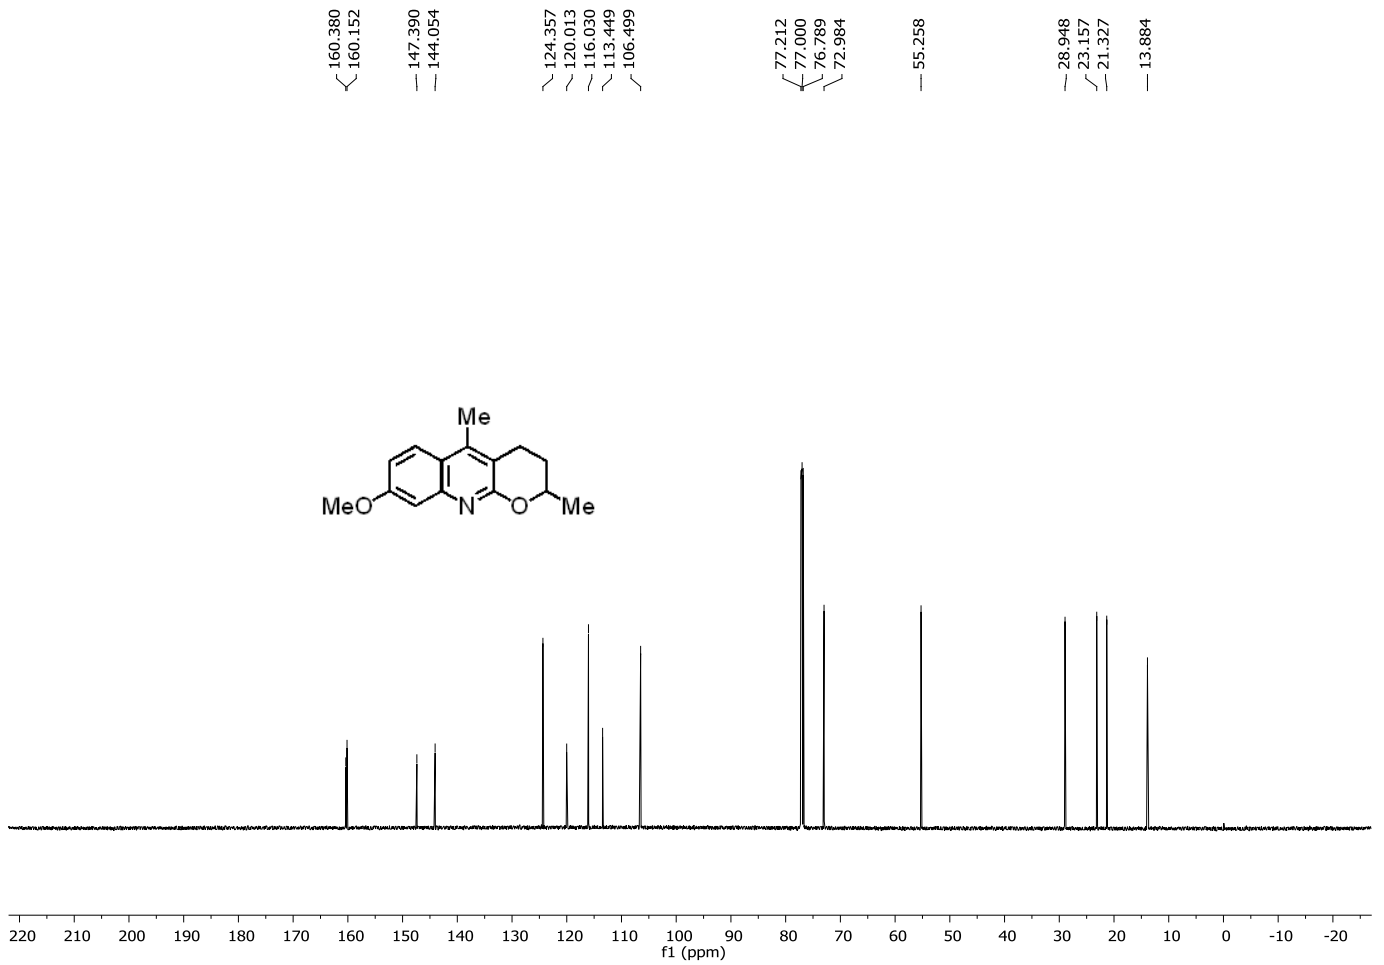

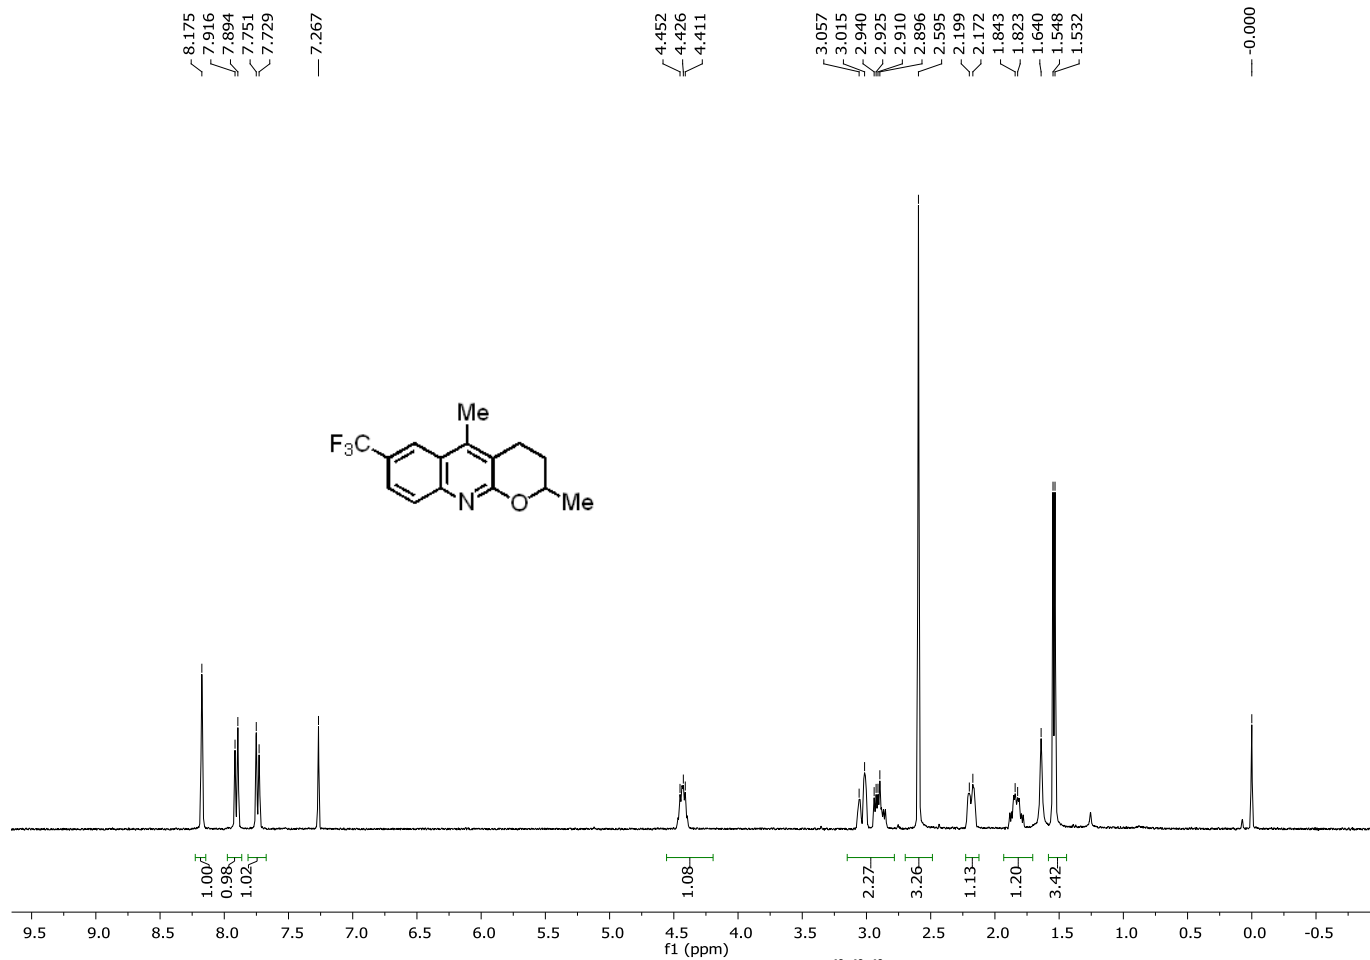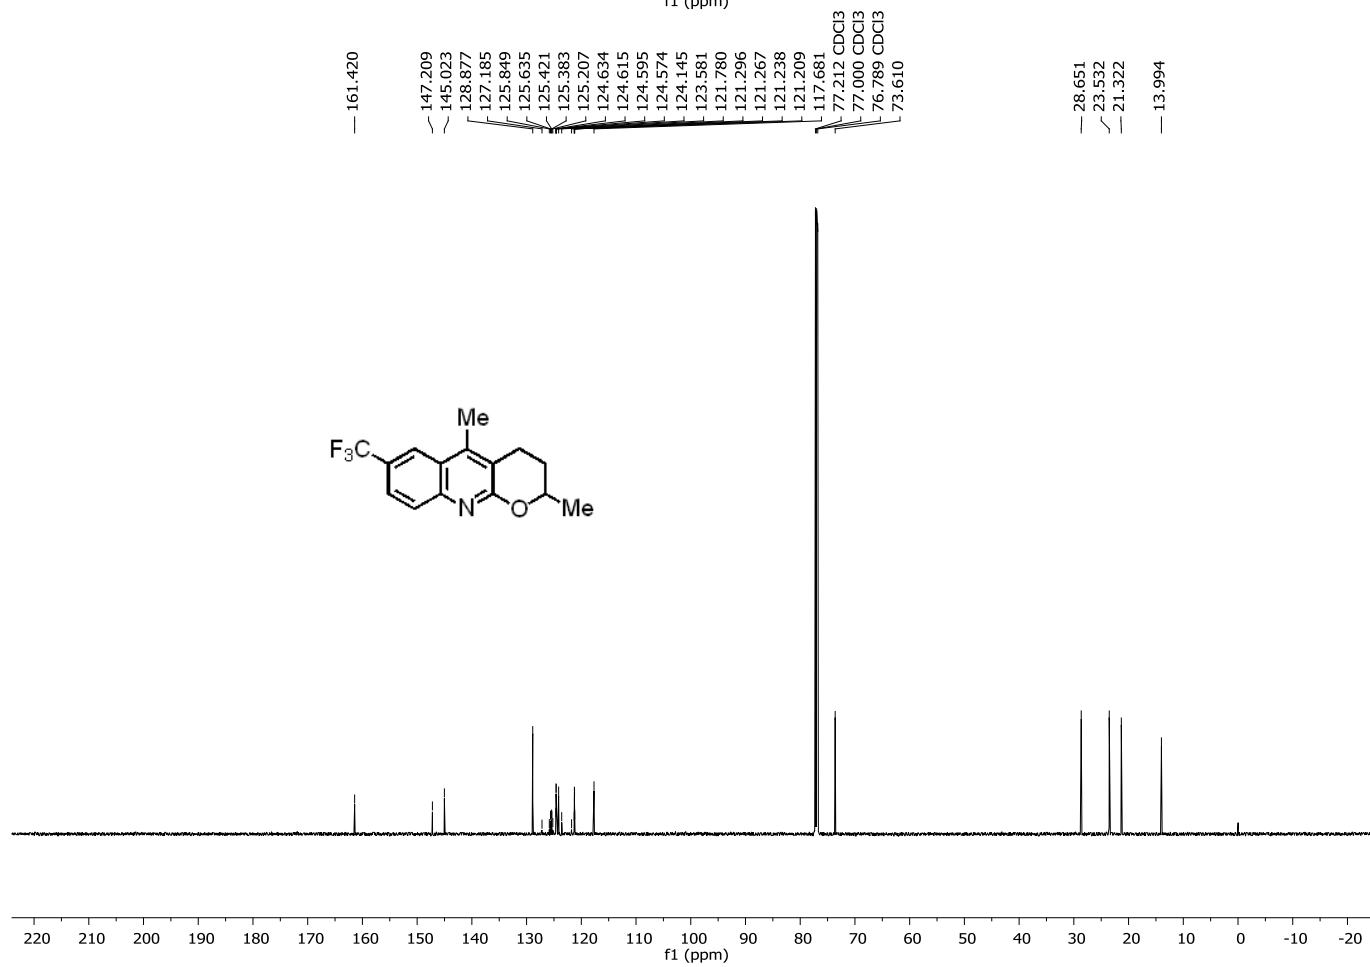

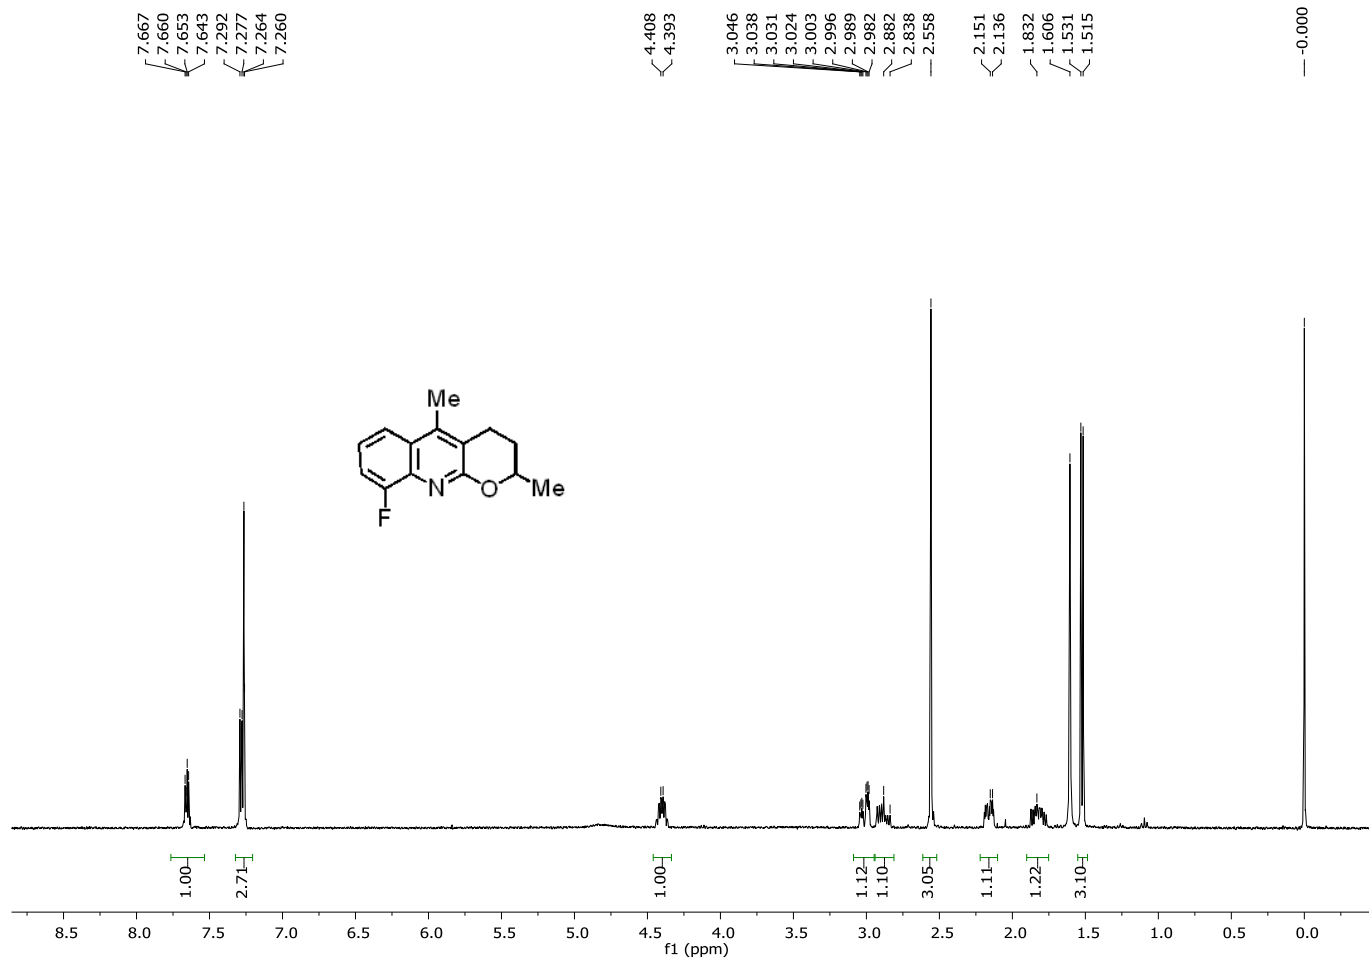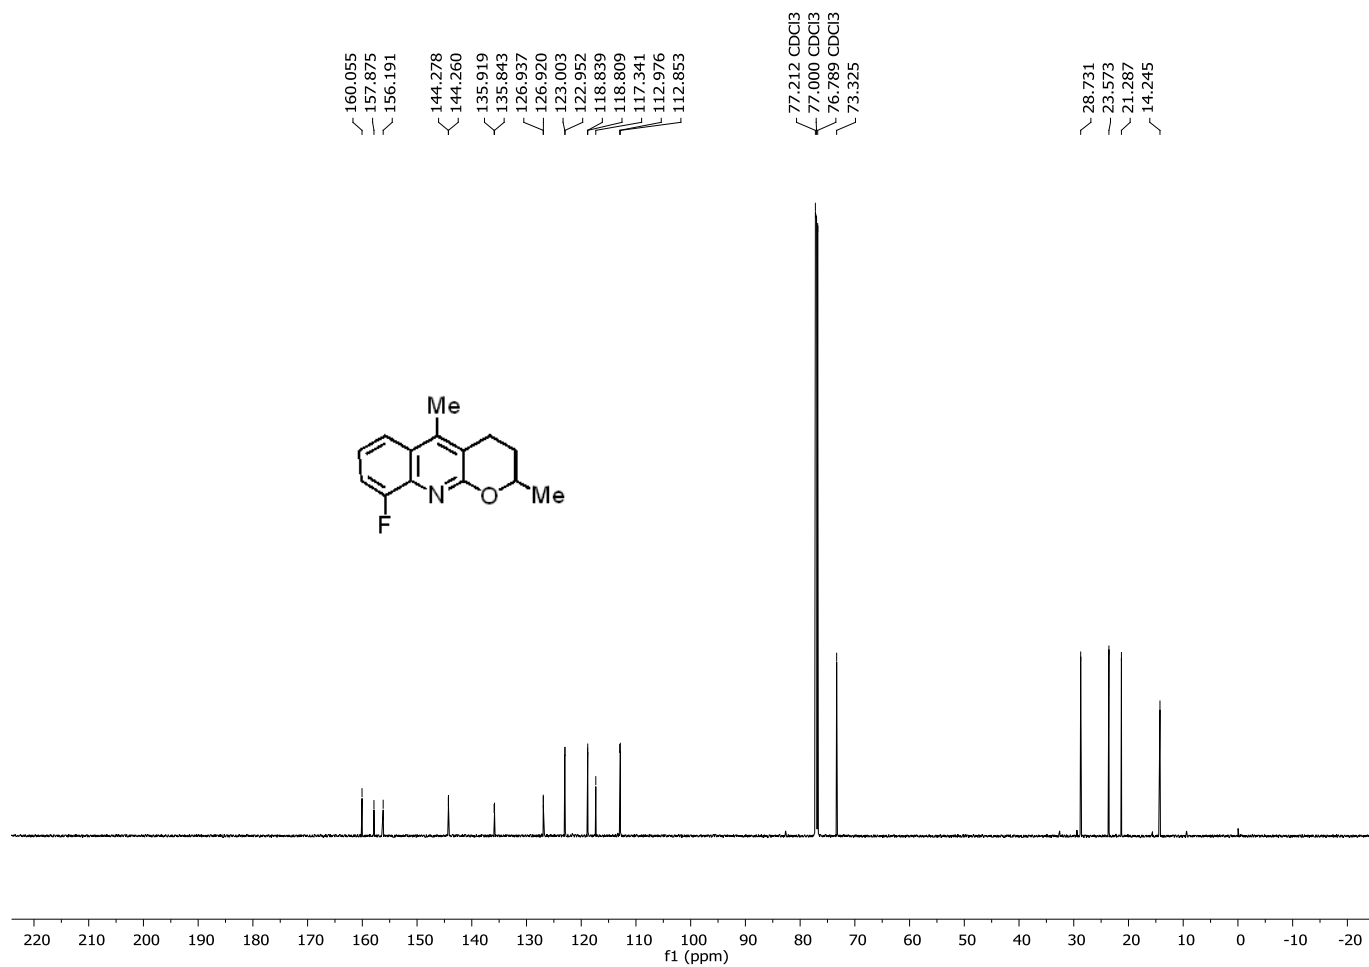

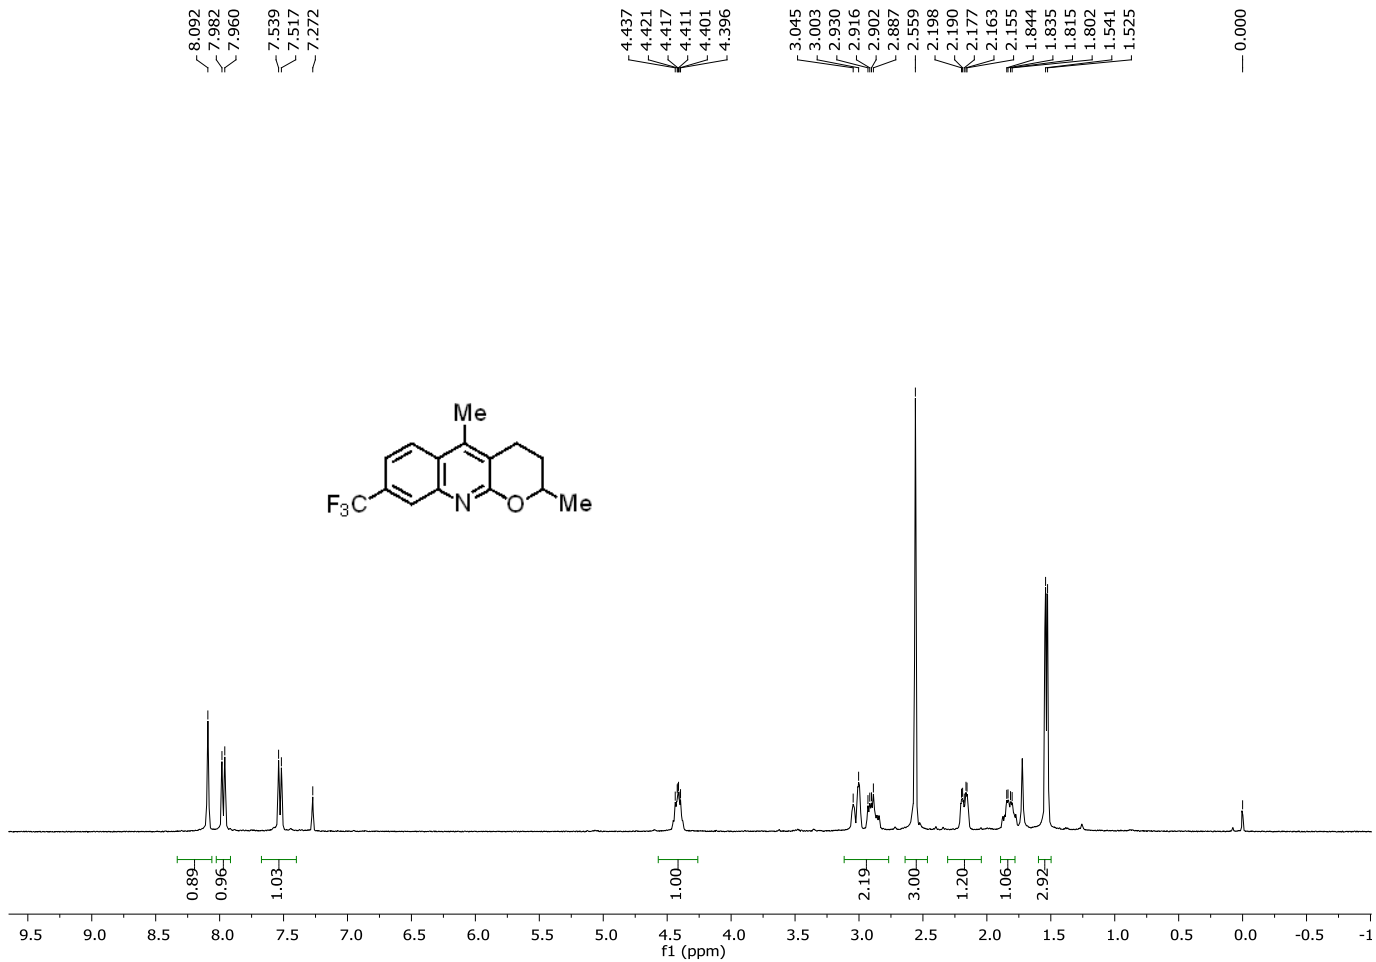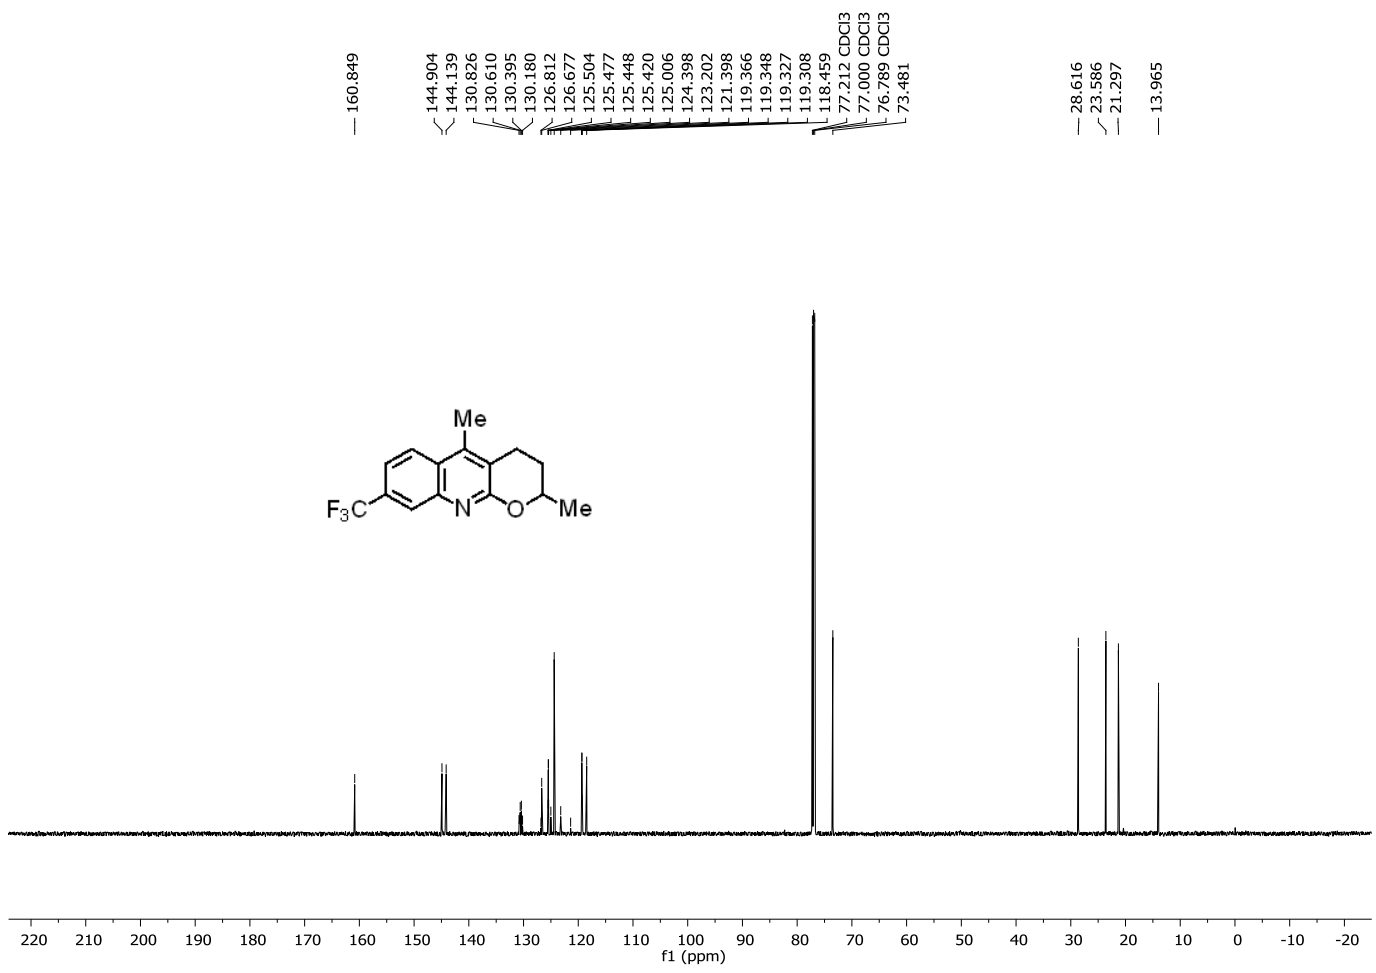



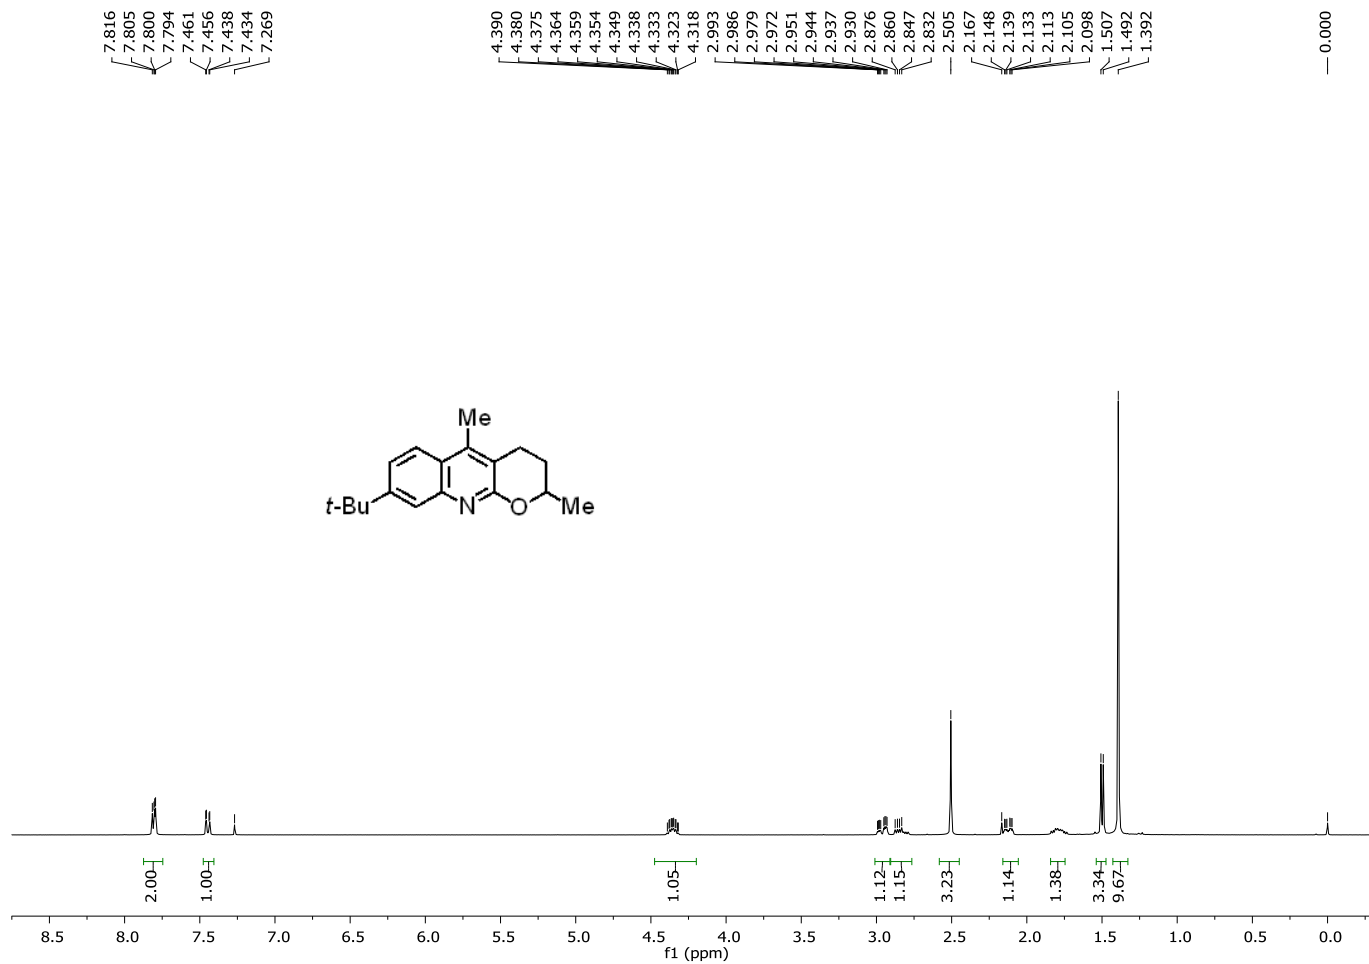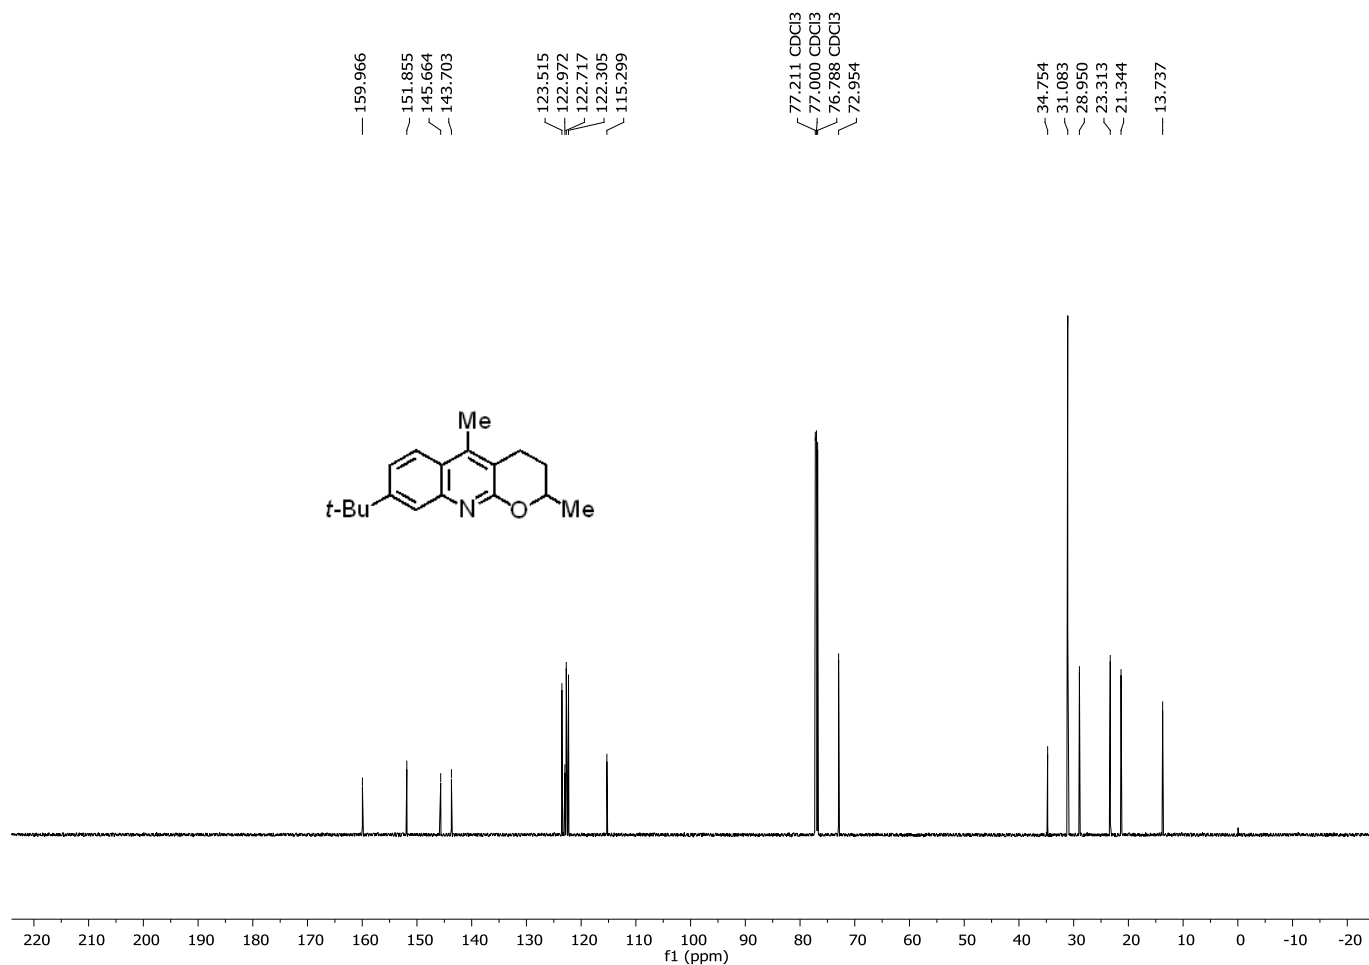

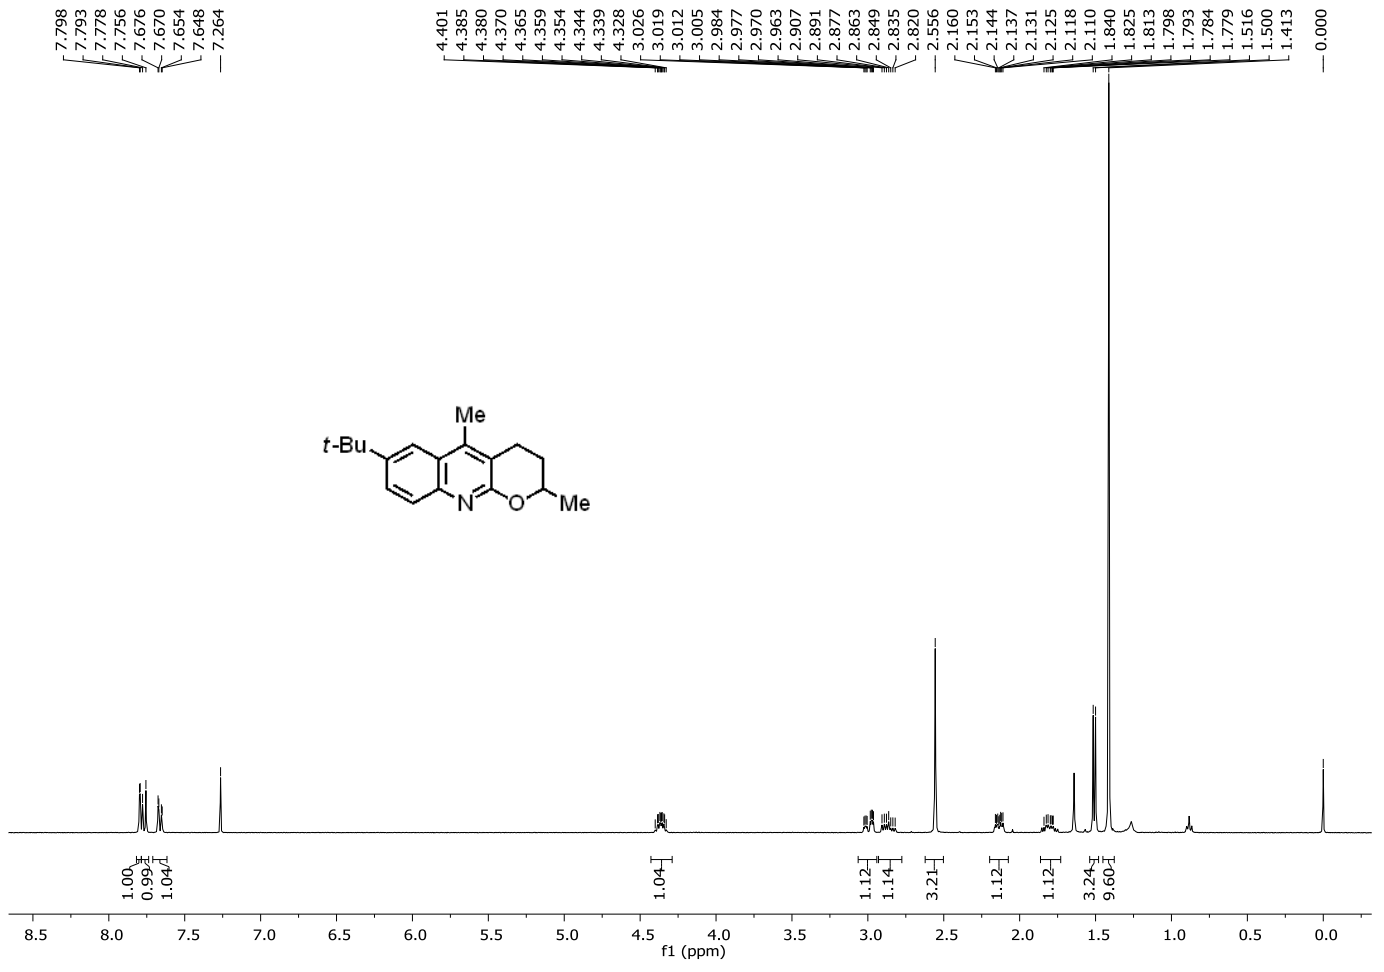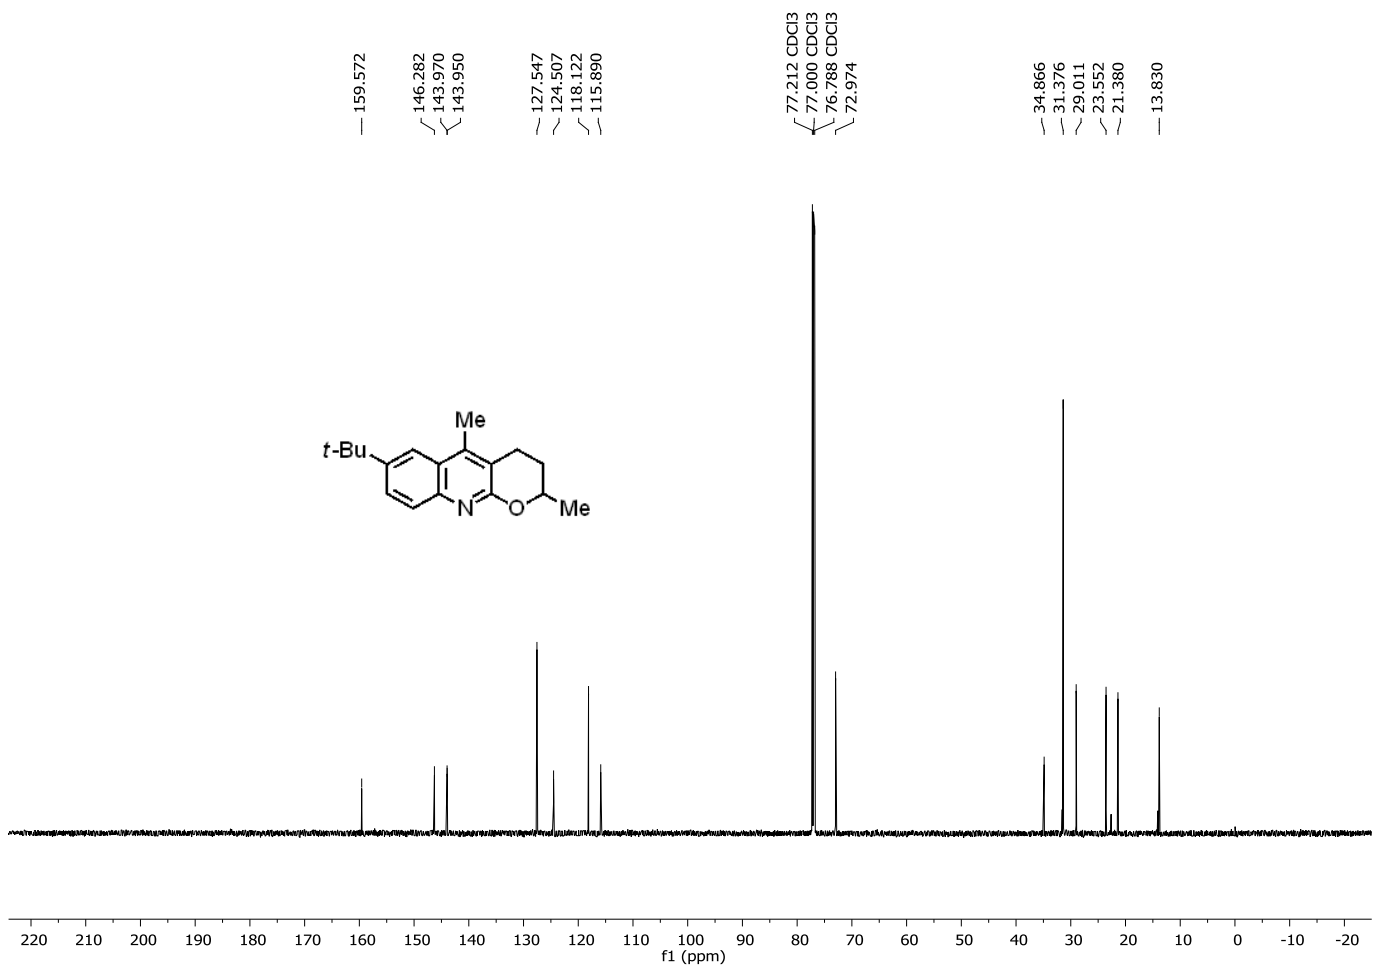

4.381  
4.366  
4.352  
4.338  
4.324  
4.309  
4.041  
4.024  
4.014  
4.006  
4.001  
3.996  
3.988  
3.983  
3.978  
3.973  
3.965  
3.960  
3.956  
3.947  
3.938  
3.920  
2.496  
2.481  
2.457  
2.454  
2.443  
2.440  
2.440  
2.428  
2.410  
2.404  
2.400  
2.388  
2.386  
2.358  
2.013  
2.007  
1.999  
1.994  
1.978  
1.973  
1.965  
1.960  
1.737  
1.709  
1.703  
1.675  
1.659  
1.411  
1.207  
1.188  
1.171  
1.129  
0.000

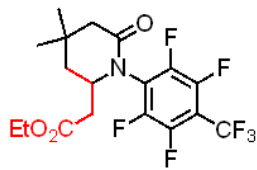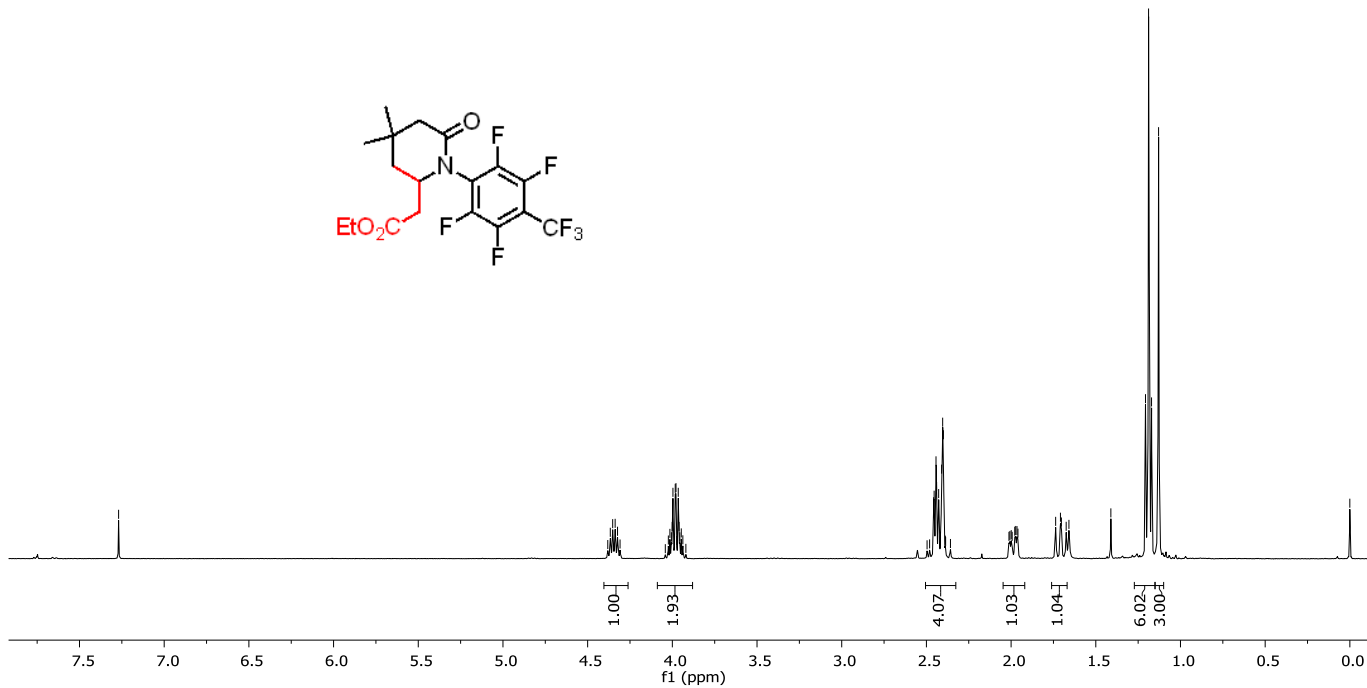

170.092  
169.769

77.211 CDCl3  
77.000 CDCl3  
76.788 CDCl3

61.059  
53.567  
53.548  
45.708  
41.990  
40.275  
30.430  
29.772  
24.467  
13.886

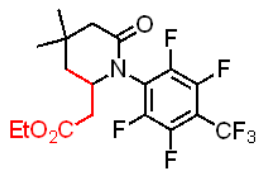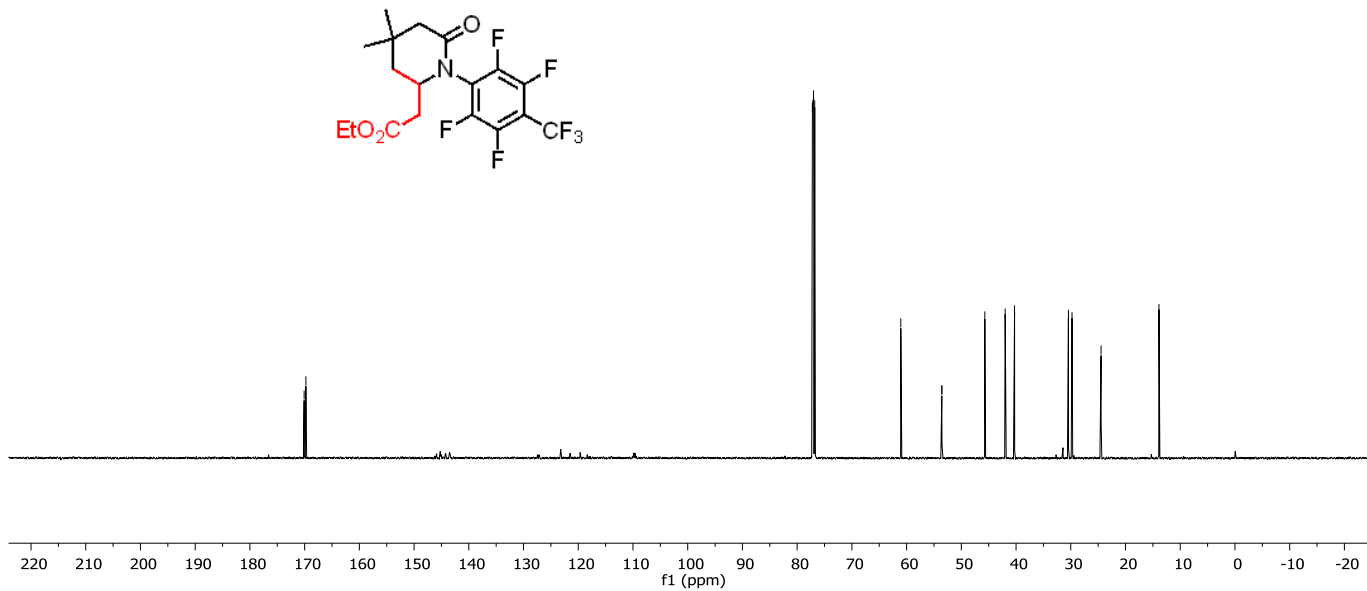

7.266

4.368  
4.354  
4.340  
4.325  
4.286  
4.271  
3.995  
3.992  
3.982  
3.977  
2.443  
2.428  
2.380  
2.364  
2.146  
2.138  
2.133  
2.126  
2.111  
2.104  
2.099  
2.091  
1.997  
1.991  
1.984  
1.978  
1.963  
1.957  
1.950  
1.944  
1.614  
1.409  
1.195  
1.187  
1.136  
1.046  
0.960  
0.944  
0.941  
0.925  
0.907

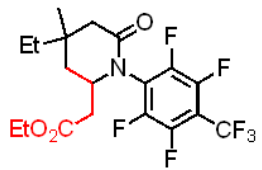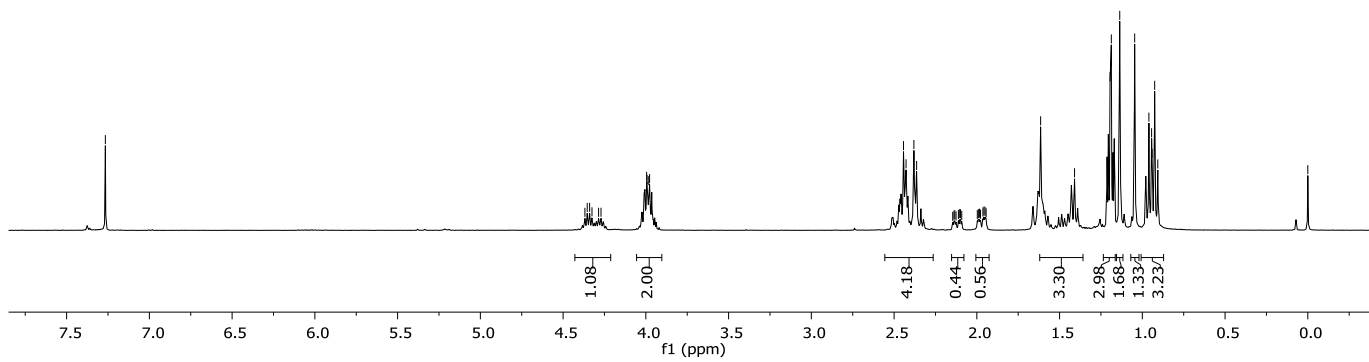

170.390  
170.157  
169.802  
169.754

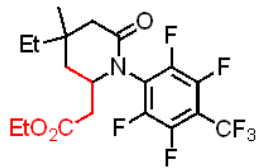

77.211 CDCl3  
77.000 CDCl3  
76.788 CDCl3  
61.074  
53.445  
53.426  
53.166  
53.147  
44.799  
43.815  
40.375  
40.271  
40.018  
39.571  
35.701  
32.440  
32.372  
29.351  
26.295  
21.416  
13.928  
13.909  
8.065  
7.584

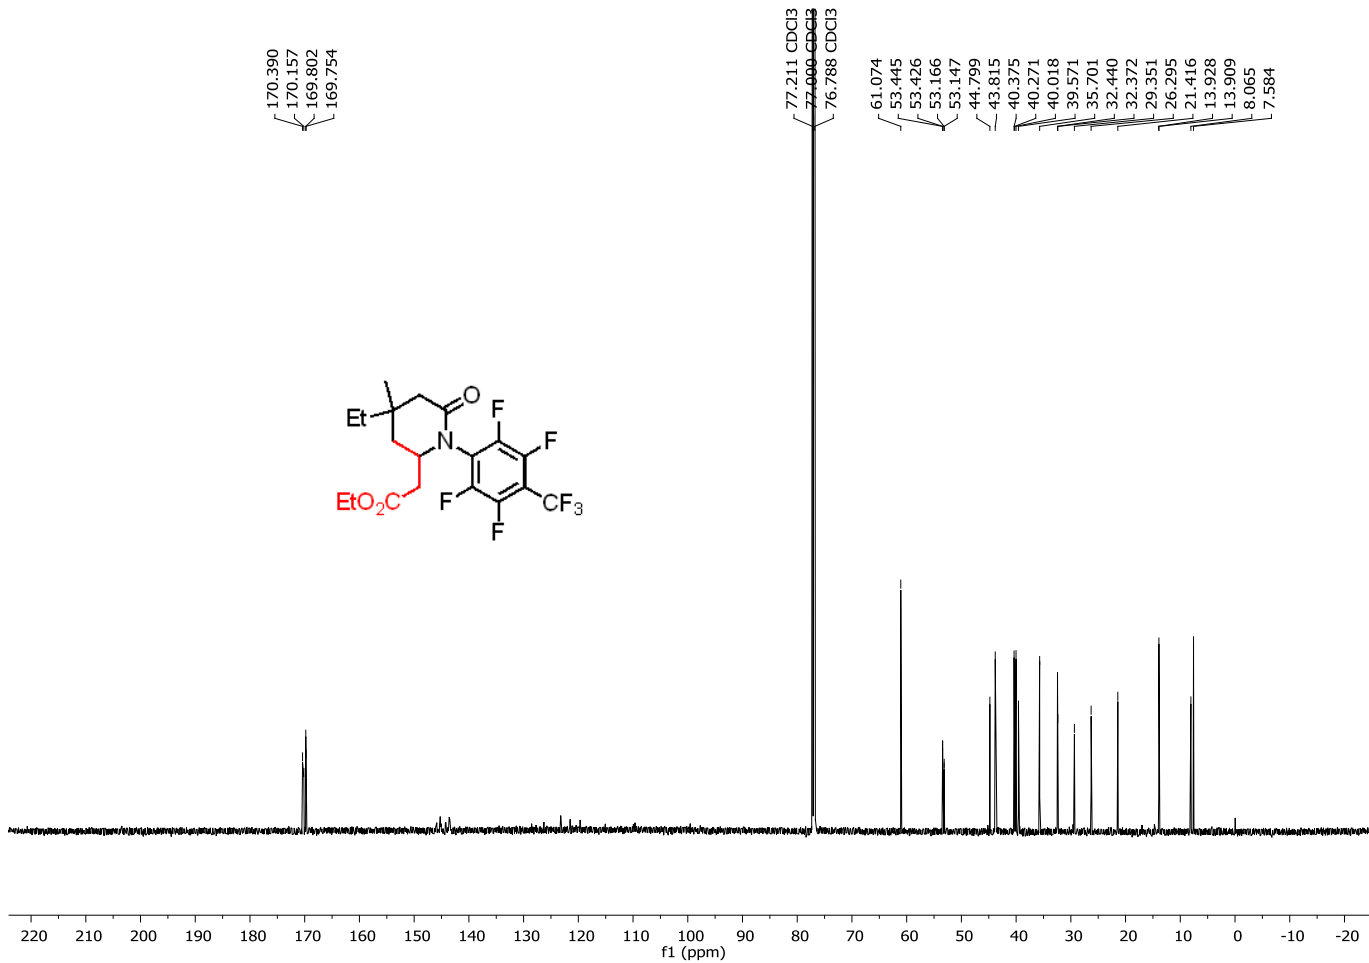

4.322  
4.305  
4.293  
4.278  
4.264  
4.249  
4.028  
4.024  
4.019  
4.010  
4.006  
3.992  
3.988  
3.978  
3.974  
3.970  
2.455  
2.446  
2.434  
2.429  
2.417  
2.346  
2.303  
2.116  
2.109  
2.104  
2.096  
2.082  
2.074  
2.070  
2.062  
1.603  
1.574  
1.567  
1.553  
1.548  
1.540  
1.534  
1.437  
1.418  
1.391  
1.372  
1.213  
1.195  
1.177  
0.933  
0.915  
0.896  
0.892  
0.874  
0.855  
0.000

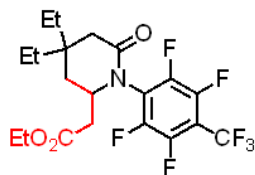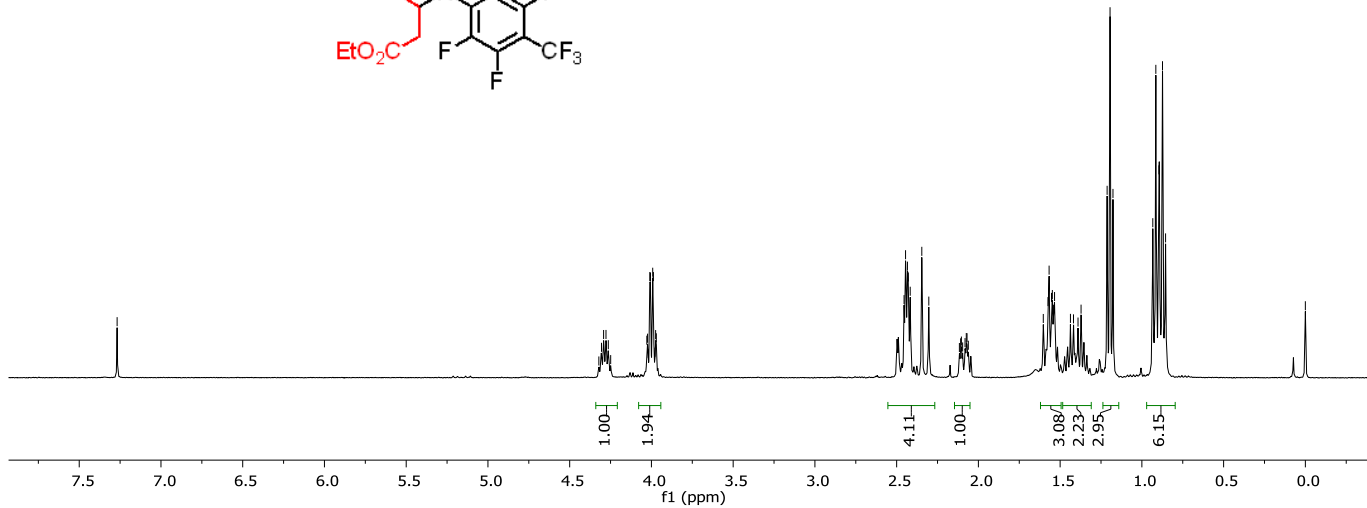

170.438  
169.740

77.212 CDCl3  
77.000 CDCl3  
76.788 CDCl3

61.044  
52.976  
52.957  
42.591  
40.295  
37.756  
34.790  
30.745  
25.581  
13.903  
7.495  
7.134

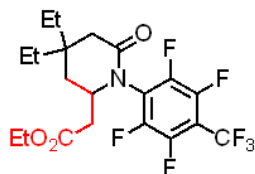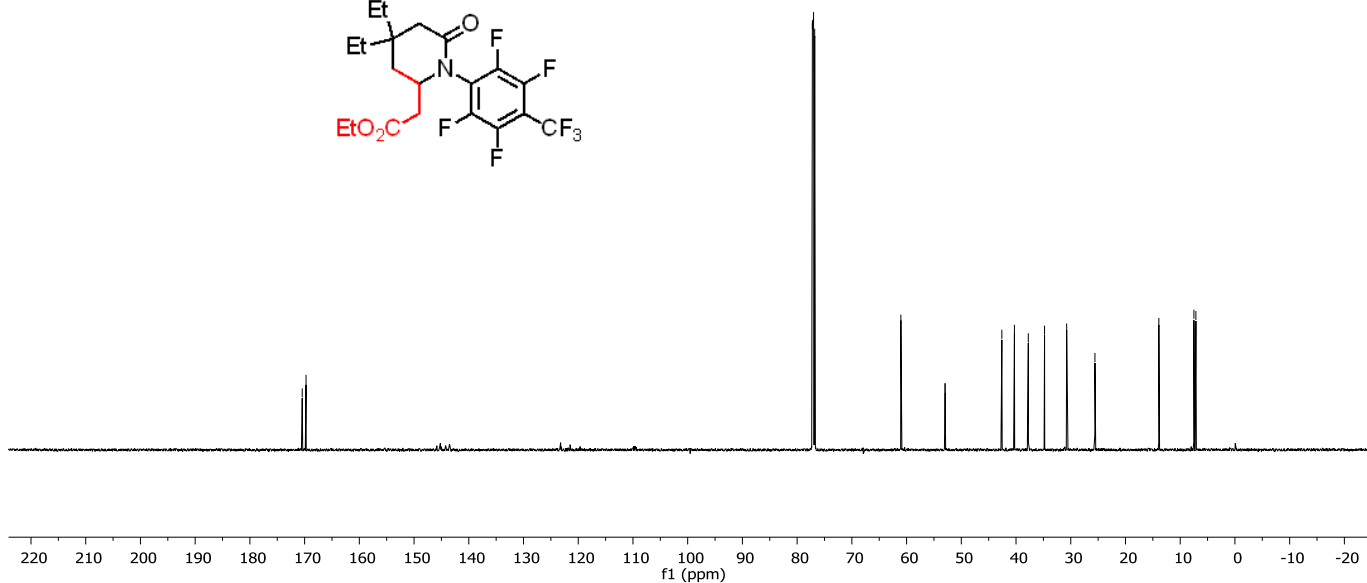

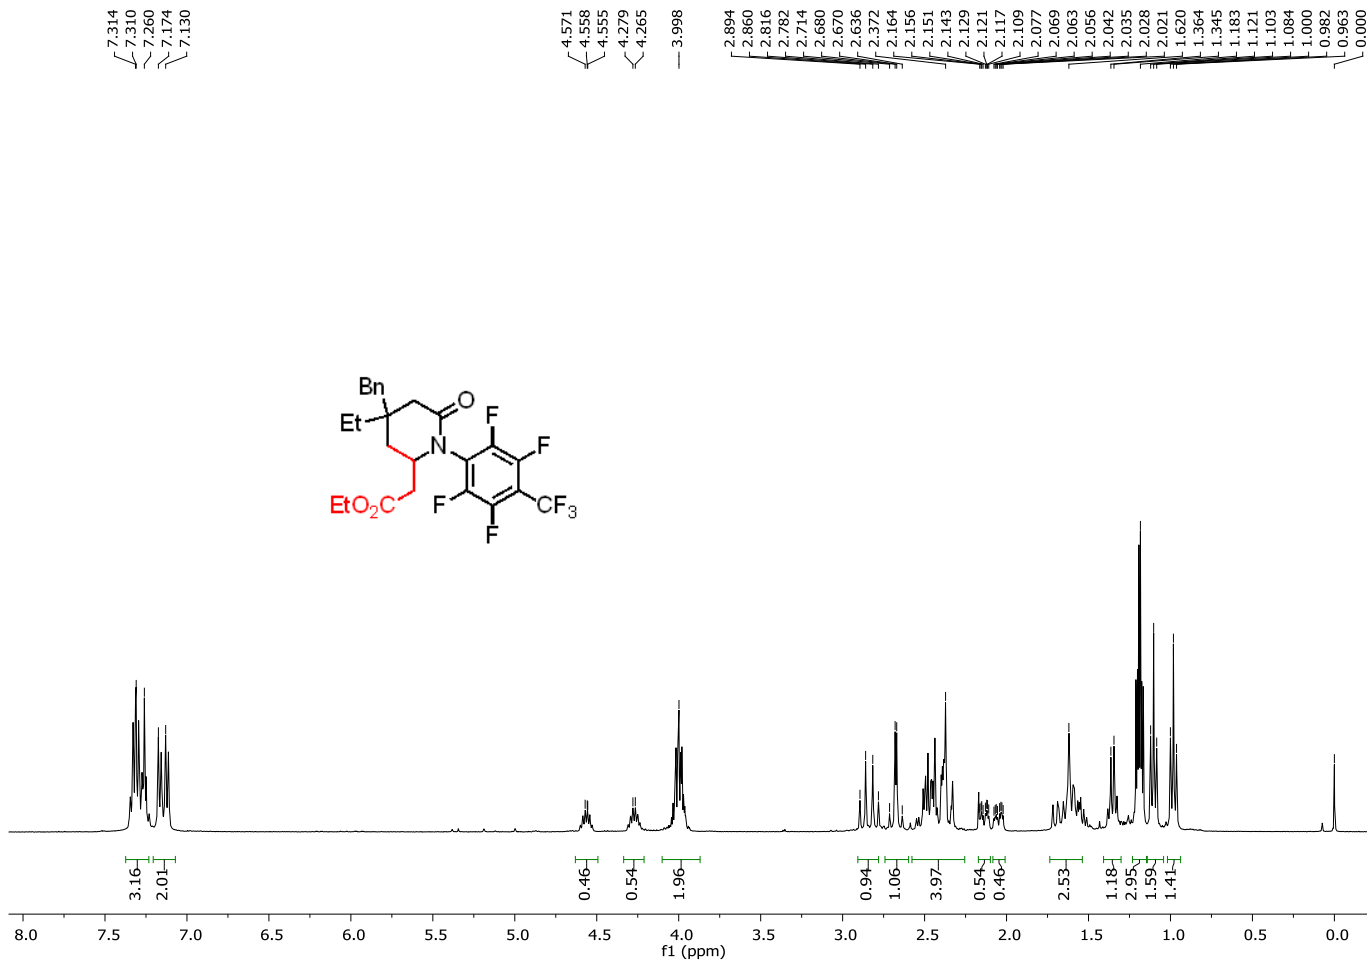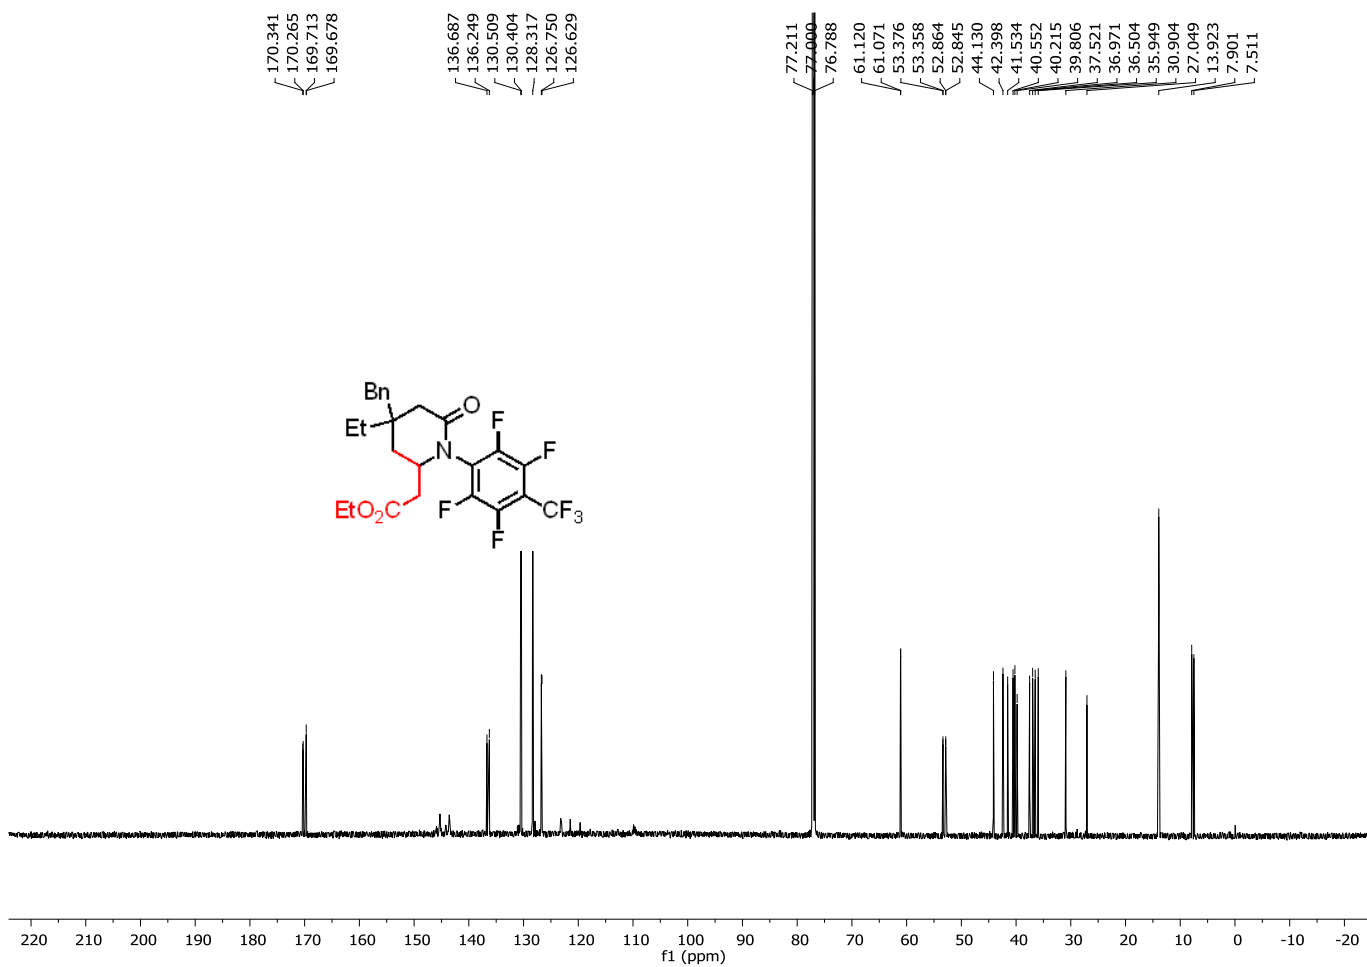

-7.267

4.383  
4.367  
4.355  
4.340  
4.327  
4.312  
4.303  
4.288  
4.274  
4.260  
4.246  
4.231  
4.025  
4.014  
4.010  
4.007  
3.996  
3.993  
2.485  
2.468  
2.457  
2.438  
2.427  
2.410  
2.369  
2.028  
2.021  
1.994  
1.986  
1.648  
1.630  
1.619  
1.595  
1.215  
1.197  
1.179  
0.958  
0.938  
0.919

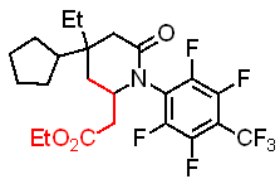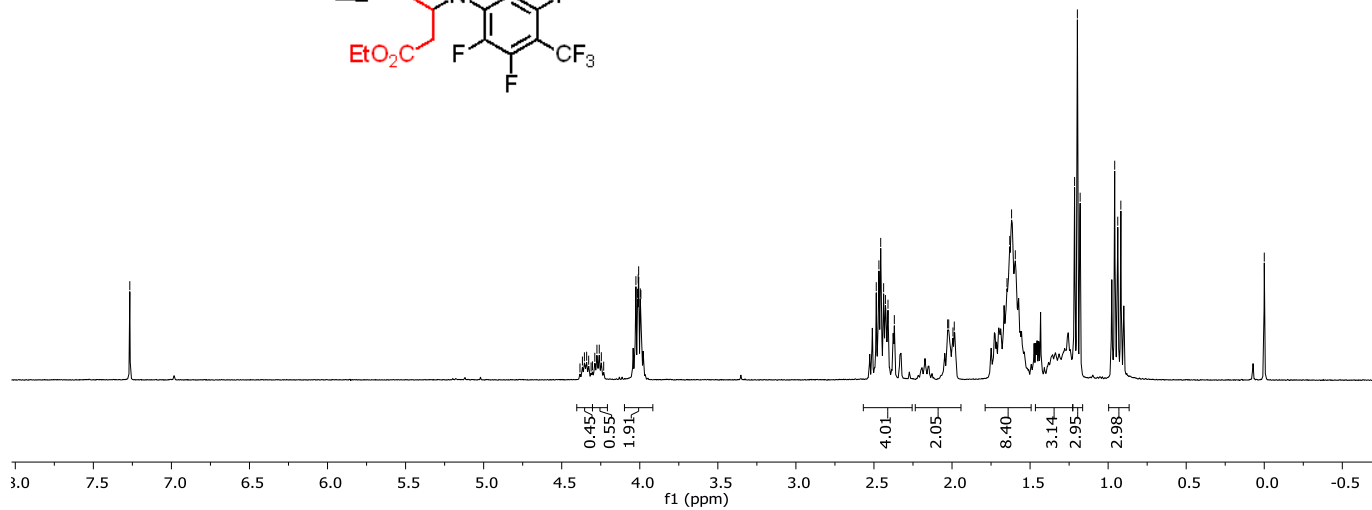

171.261  
171.094  
169.779  
169.751

77.212 CDCl3  
77.000 CDCl3  
76.788 CDCl3

61.087  
61.059  
53.476  
52.829  
52.812  
45.039  
44.663  
40.593  
40.280  
40.099  
39.129  
36.609  
36.470  
35.486  
27.720  
27.466  
26.402  
26.276  
26.179  
25.894  
25.596  
25.535  
25.485  
25.356  
13.939  
7.980  
7.511

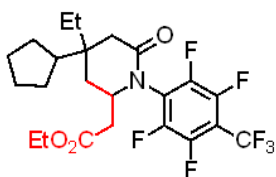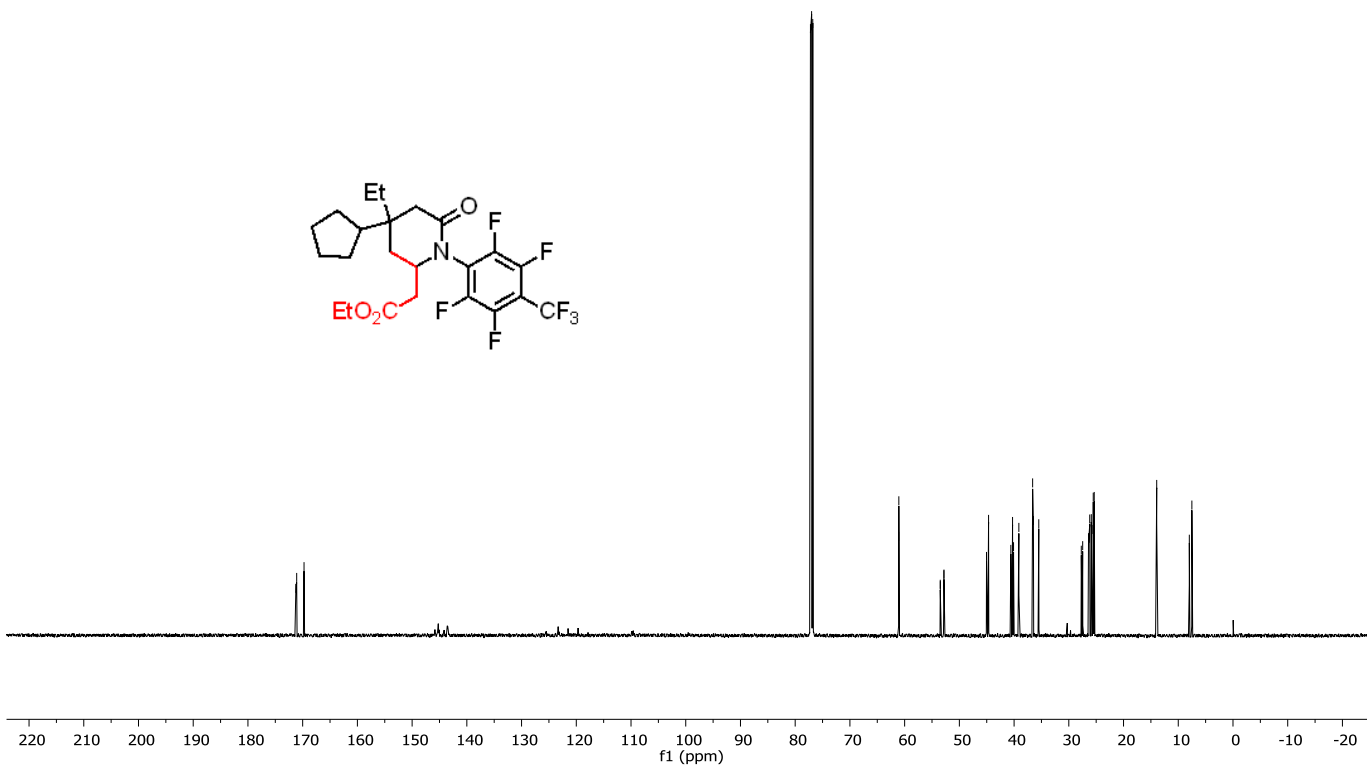

-7.267

4.389  
4.383  
4.371  
4.362  
3.975  
3.969  
3.381  
3.376  
3.209  
3.187  
3.154  
3.131  
2.703  
2.660  
2.452  
2.419  
2.377  
2.327  
2.284  
2.206  
1.933  
1.904  
1.694  
1.664  
1.634  
1.206  
1.188  
1.160  
1.103

-0.000

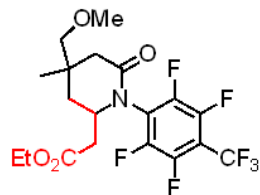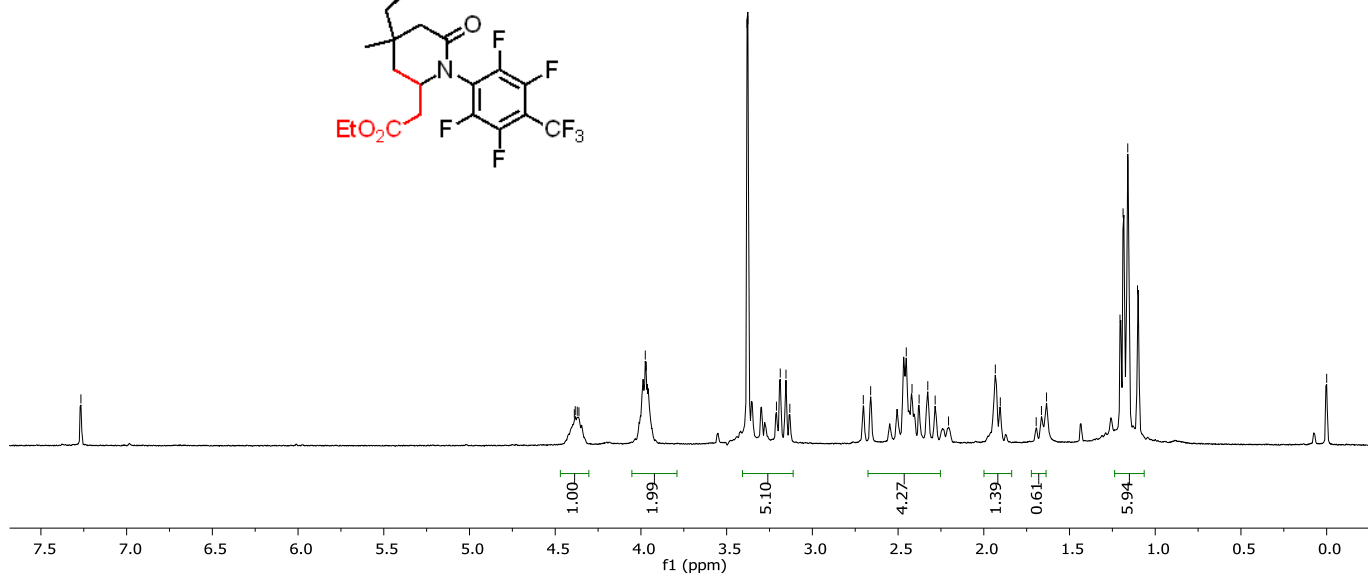

170.284  
170.086  
169.849  
169.766

80.765  
78.463  
77.212 CDCl3  
77.000 CDCl3  
76.789 CDCl3  
61.063  
61.038  
59.398  
59.293  
53.536  
53.517  
53.206  
53.188  
41.847  
40.896  
40.324  
40.301  
38.643  
37.042  
34.125  
33.980  
25.974  
20.660  
13.899

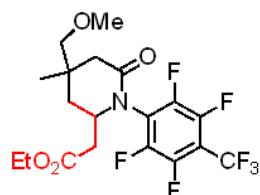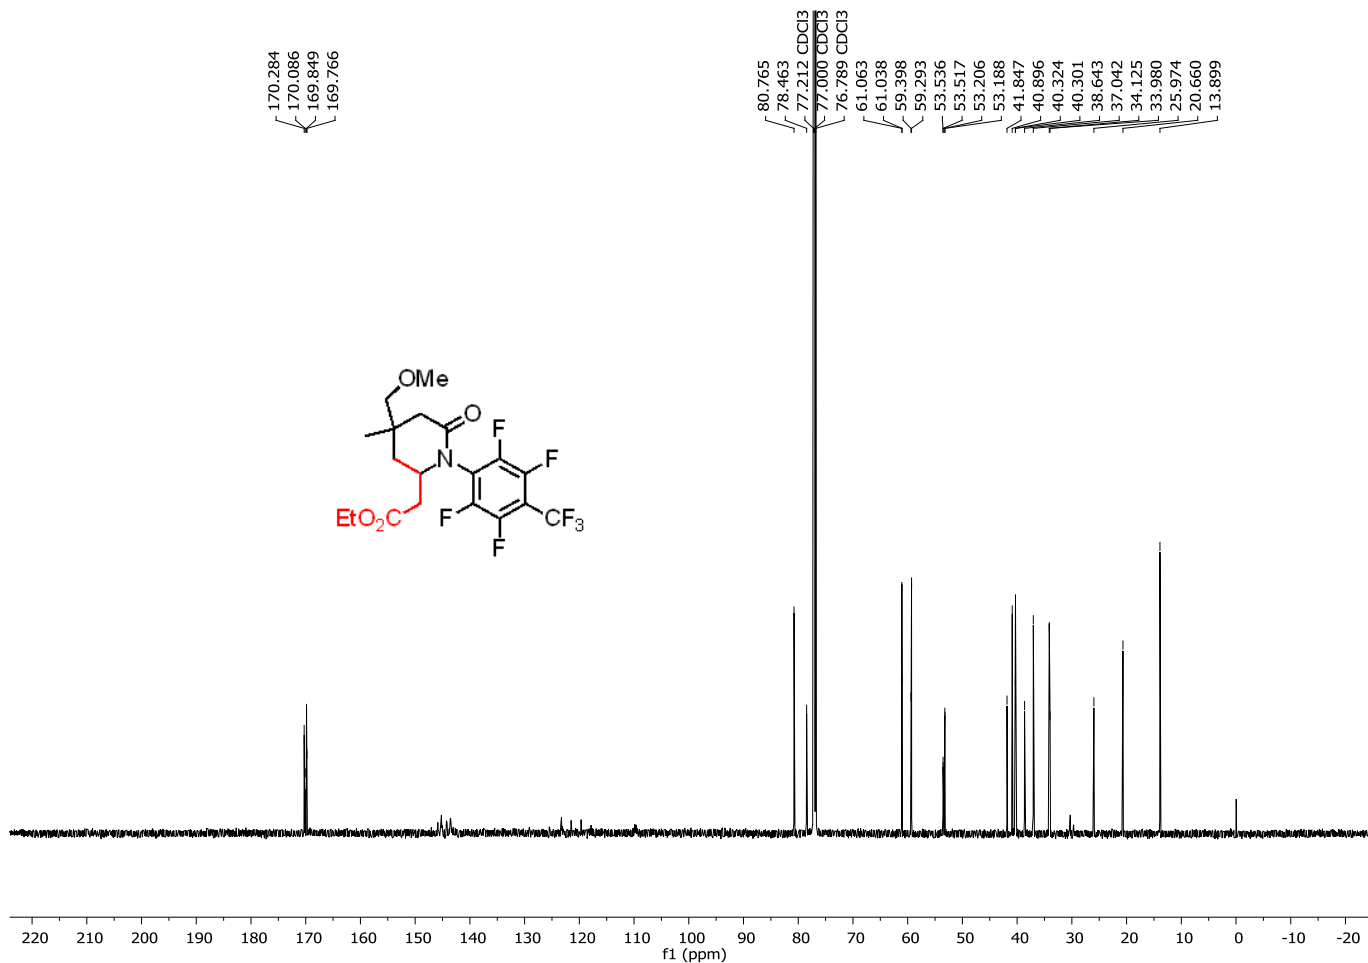



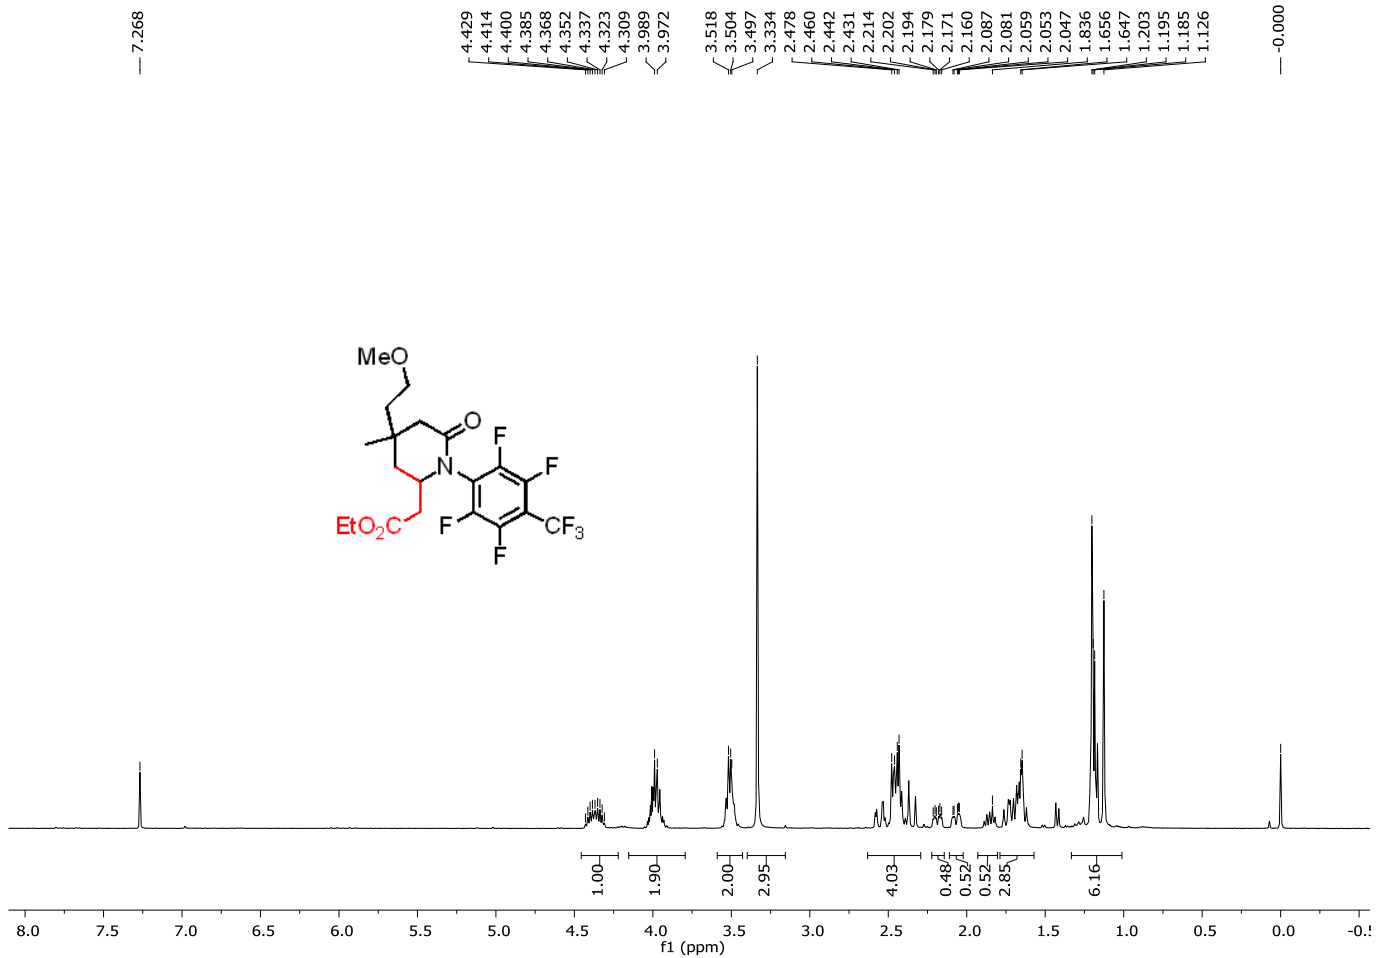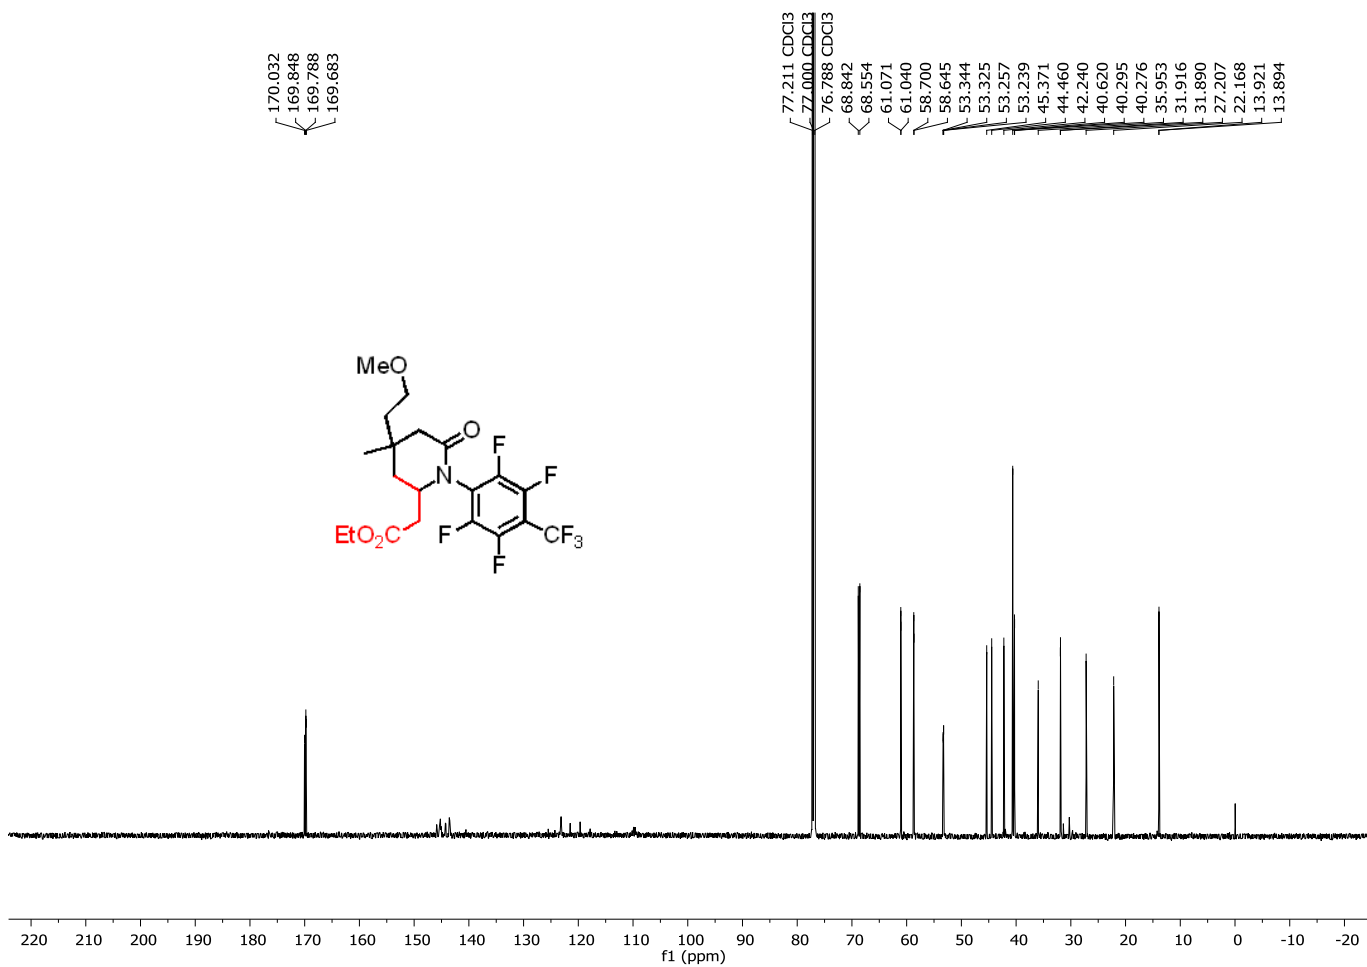

7.266

4.342  
4.327  
4.313  
4.299  
4.285  
4.270  
4.000  
3.990  
3.982  
3.972

2.555  
2.548  
2.513  
2.506  
2.465  
2.438  
2.080  
2.073  
2.067  
2.060  
2.047  
2.039  
2.033  
2.026  
2.026  
1.879  
1.851  
1.845  
1.817  
1.723  
1.719  
1.622  
1.566  
1.208  
1.190  
1.172  
-0.000

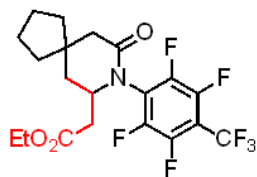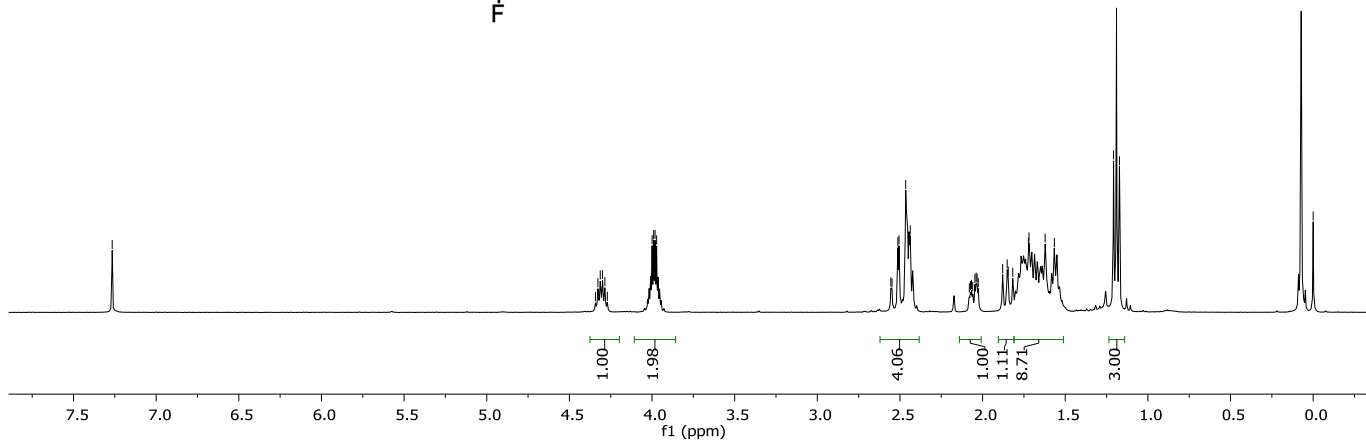

170.262  
169.813

77.211 CDCl3  
76.999 CDCl3  
76.788 CDCl3

61.050  
54.247  
54.228  
44.114  
40.622  
40.396  
40.287  
40.006  
34.685  
24.444  
23.773  
13.906

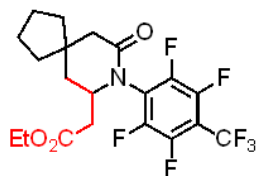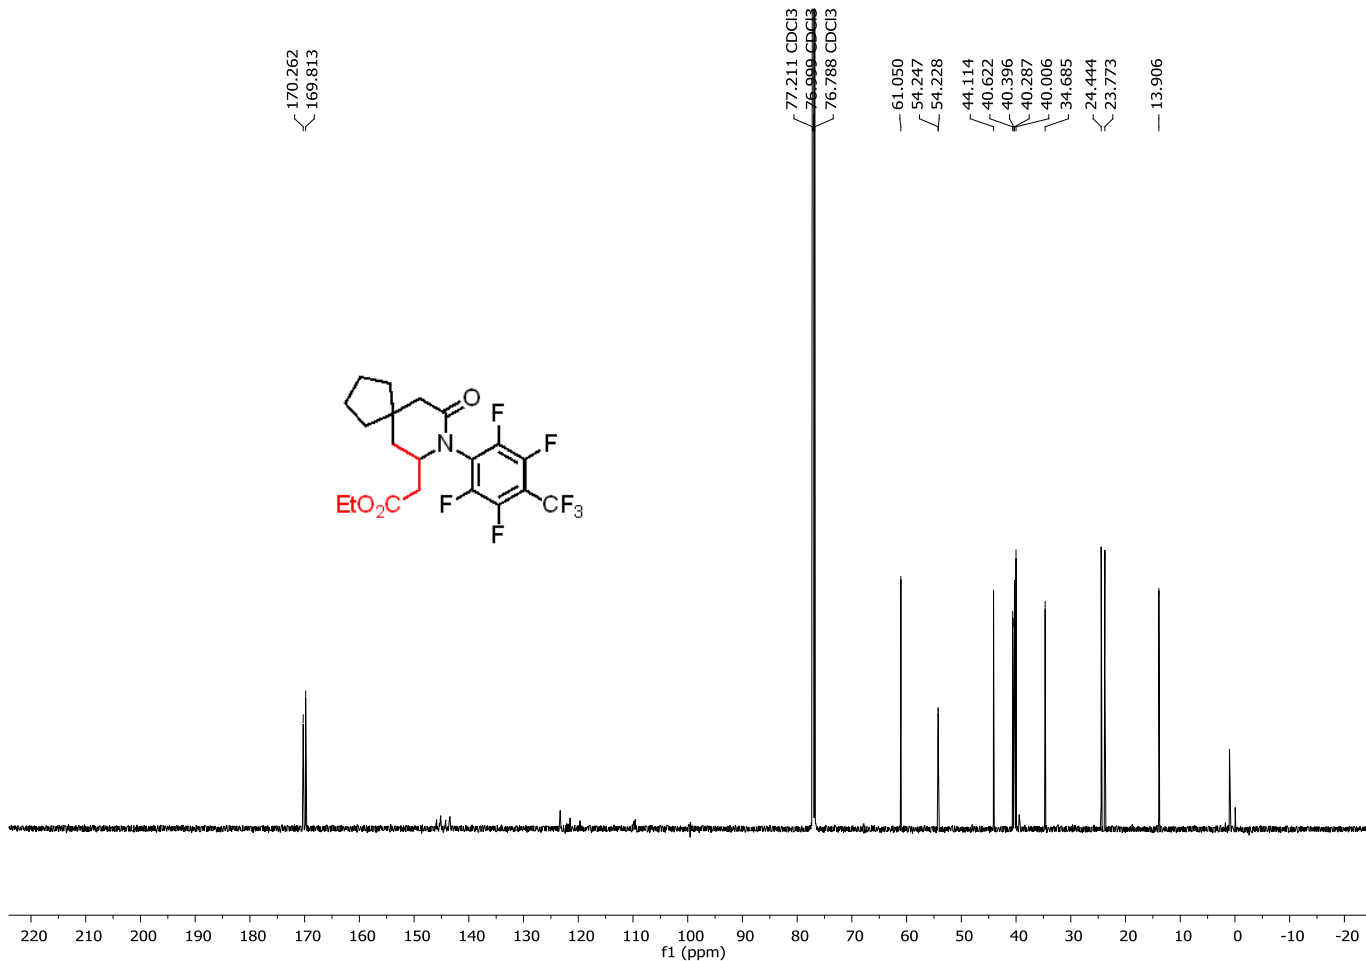

7.268

4.355  
4.340  
4.326  
4.312  
4.298  
4.283  
4.021  
4.014  
4.003  
3.996  
3.986  
3.979  
3.968  
3.961  
2.667  
2.659  
2.624  
2.616  
2.450  
2.442  
2.435  
2.425  
2.288  
2.245  
2.236  
2.214  
2.207  
2.202  
2.194  
1.554  
1.542  
1.536  
1.211  
1.193  
1.175

0.000

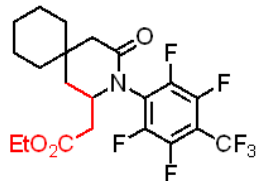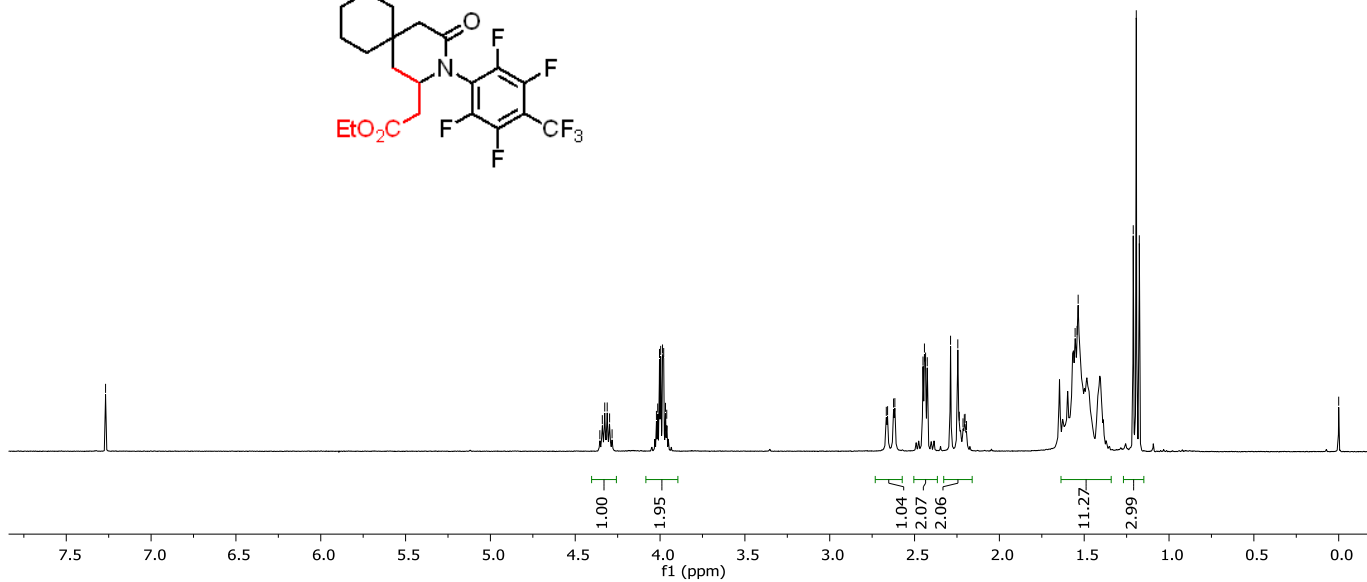

170.103  
169.796

77.211 CDCl3  
76.999 CDCl3  
76.788 CDCl3

61.049  
52.765  
52.746  
43.643  
40.306  
39.457  
39.119  
32.675  
32.399  
25.943  
21.567  
21.421  
13.915

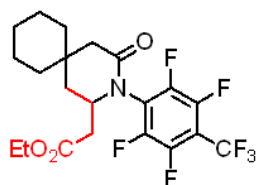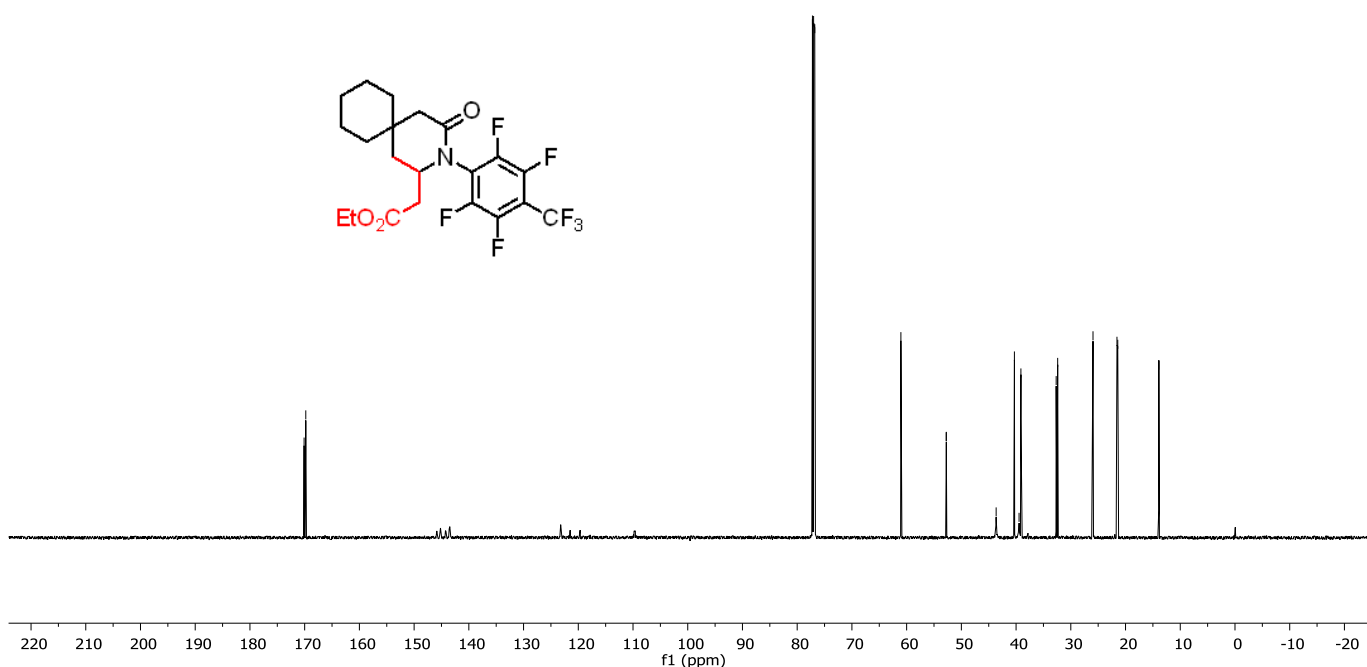

-7.274

4.373  
4.358  
4.344  
4.330  
4.316  
4.301  
4.011  
4.003  
3.994  
3.986  
3.773  
3.768  
3.756

2.853  
2.845  
2.810  
2.802  
2.479

2.470  
2.466  
2.463  
2.453  
2.373  
2.330  
2.303  
2.295  
2.290  
2.282  
2.268  
2.260  
2.255  
2.247  
1.705  
1.699  
1.214  
1.197  
1.179

-0.000

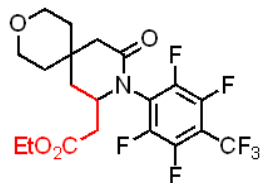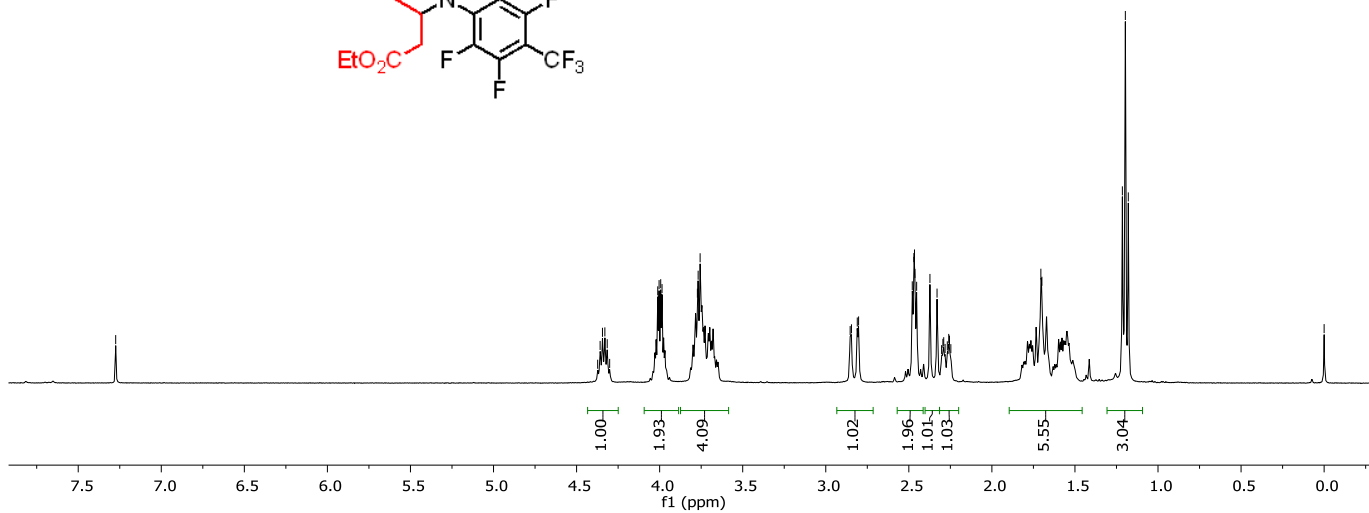

169.589  
169.213

77.211 CDCl3  
77.000 CDCl3  
76.788 CDCl3

63.346  
61.156  
52.433  
52.414  
42.450  
40.064  
39.689  
38.419  
32.762  
30.410

13.891

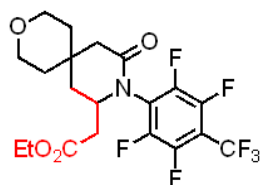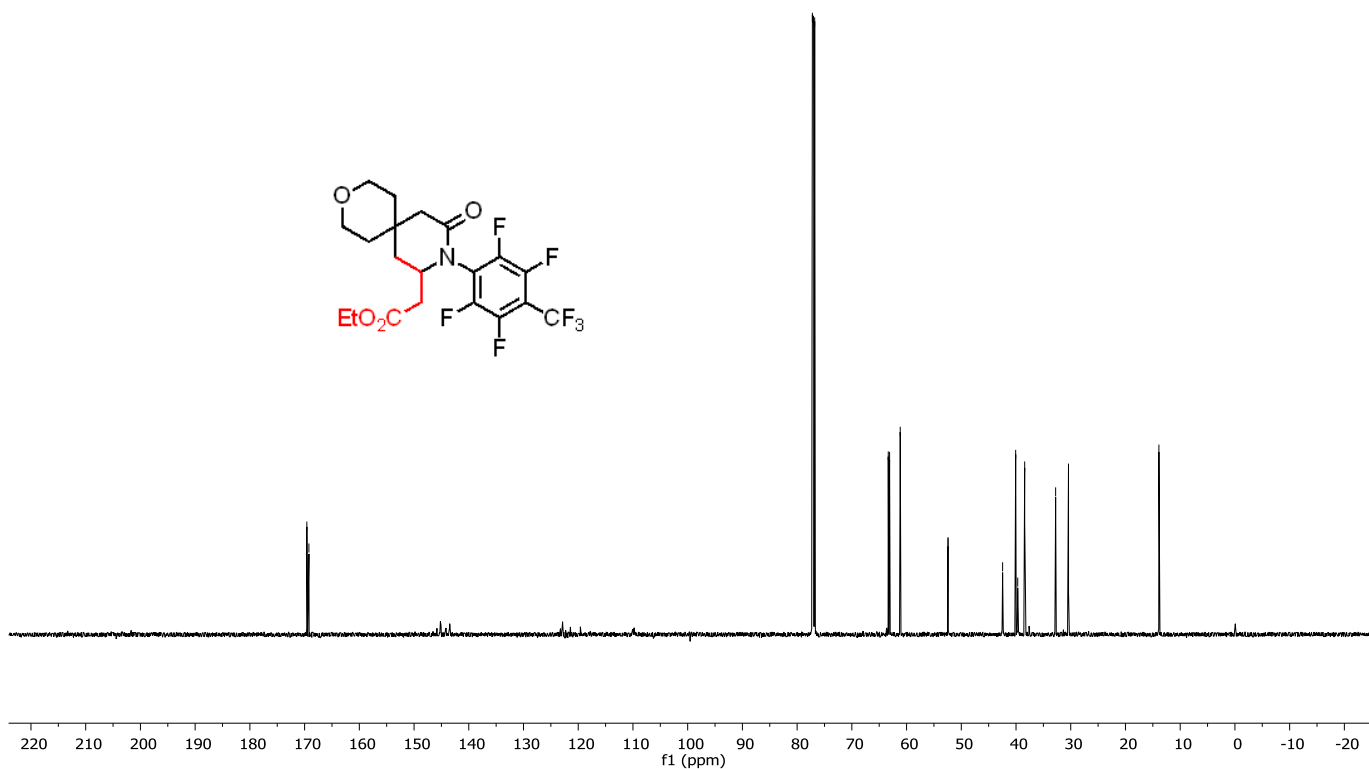

-7.270

4.363  
4.348  
4.333  
4.318  
4.303  
4.288  
4.273  
4.027  
4.009  
3.911  
3.876  
3.714  
3.564

2.805  
2.797  
2.762  
2.754  
2.489  
2.481  
2.475  
2.286  
2.258  
2.250  
1.800  
1.649  
1.645  
1.639  
1.627  
1.219  
1.201  
1.183

-0.000

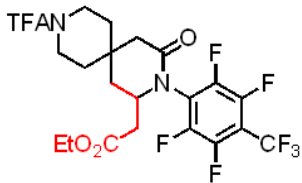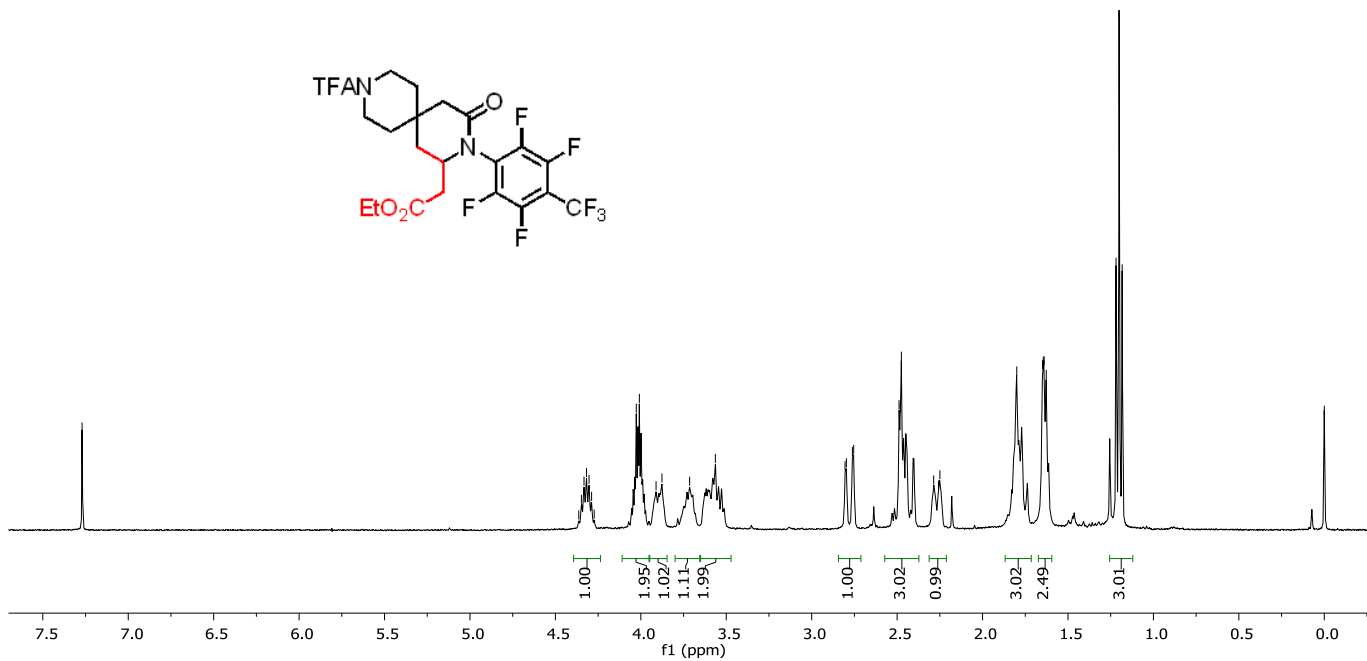

169.502  
169.437  
168.543  
168.508  
155.786  
155.701  
155.550  
155.464  
155.312  
155.226  
155.075  
154.990

119.221  
117.314  
115.406  
113.499

77.211 CDCl3  
77.000 CDCl3  
76.788 CDCl3

61.316  
61.303  
52.466  
52.447  
52.359  
52.341  
41.857  
41.653  
41.630  
41.378  
41.355  
39.756  
39.285  
39.064  
38.973  
38.873  
38.224  
37.221  
32.453  
31.531  
31.381  
31.344  
13.915

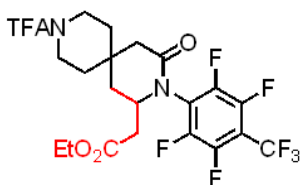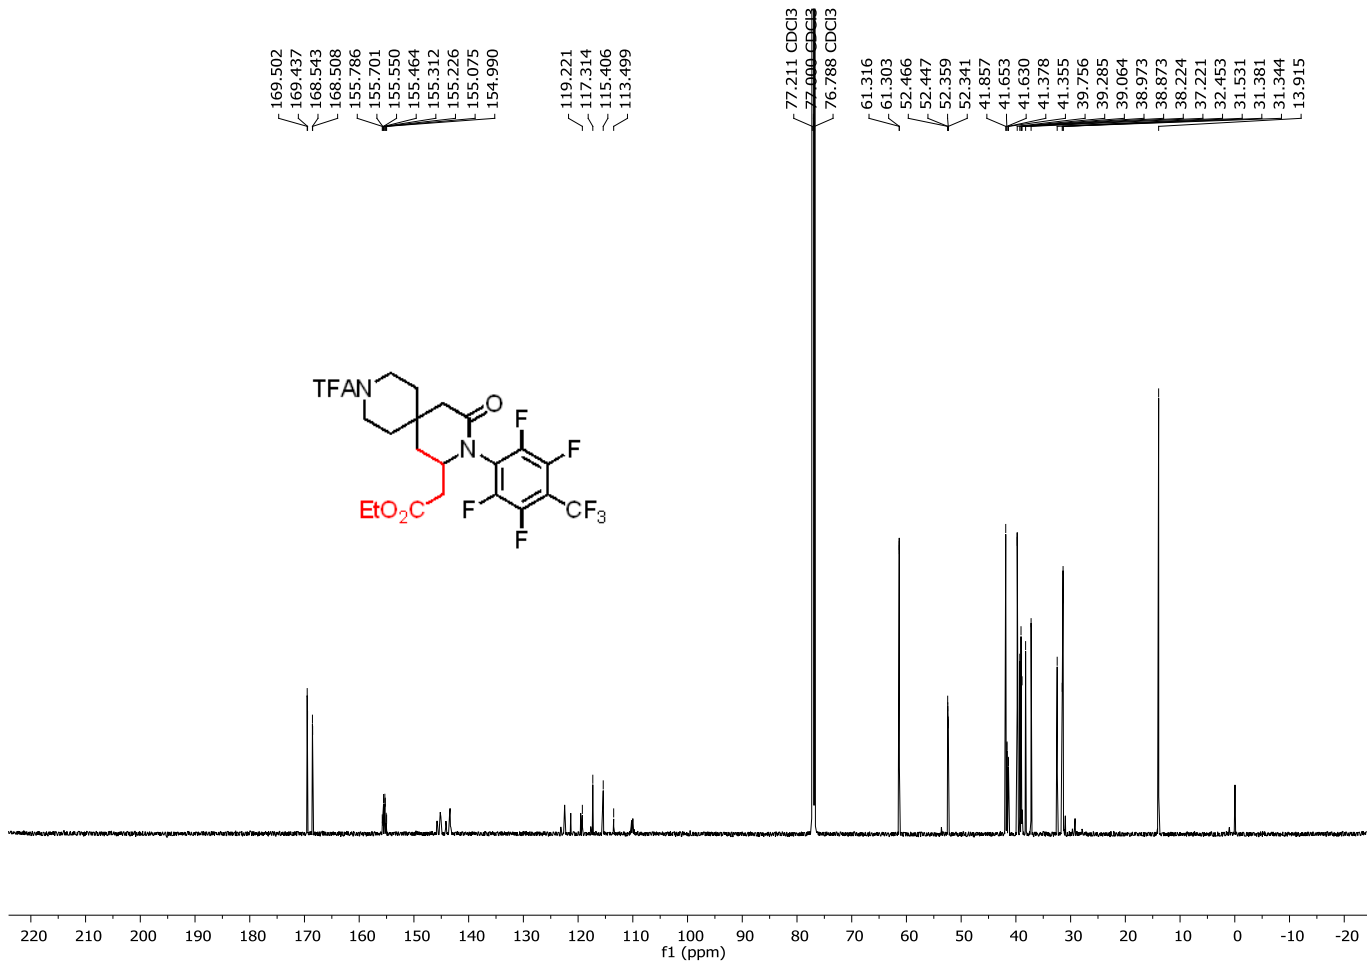

7.383  
7.379  
7.369  
7.353  
7.341  
7.338  
7.326  
7.321  
7.304  
7.298  
7.291  
7.285  
7.280  
7.257

4.989  
4.350  
4.336  
4.321  
4.306  
4.292  
4.277

2.490  
2.479  
2.463  
2.427  
2.422  
2.385  
2.379  
2.366  
2.323  
1.958  
1.952  
1.945  
1.939  
1.924  
1.917  
1.911  
1.905  
1.695  
1.668  
1.666  
1.662  
1.648  
1.633  
1.151  
1.086  
0.000

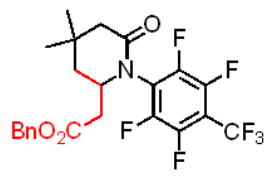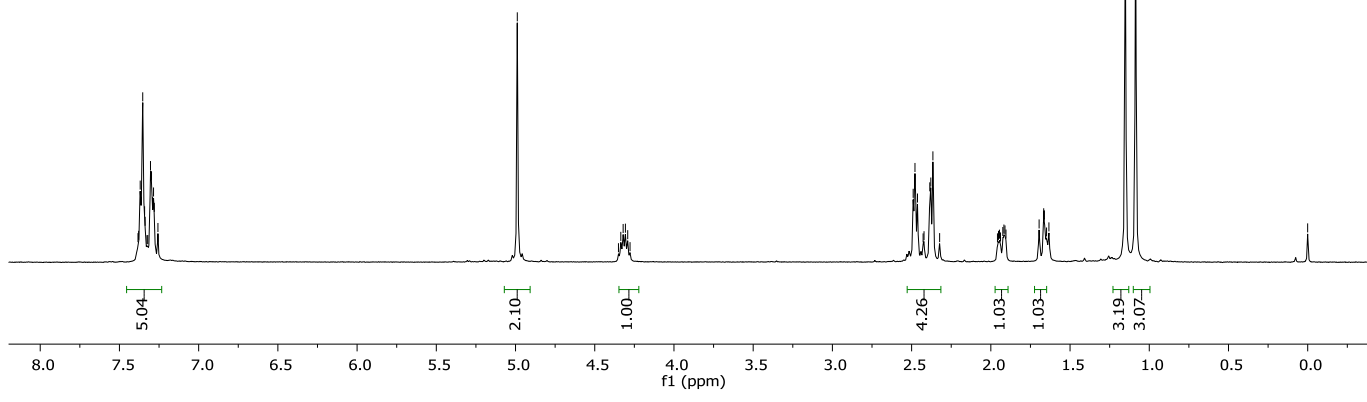

170.091  
169.447

134.915  
128.648  
128.632  
128.471

77.211 CDCl3  
77.000 CDCl3  
76.788 CDCl3  
66.849

53.545  
53.526  
45.697  
41.737  
40.098  
30.378  
29.707  
24.421

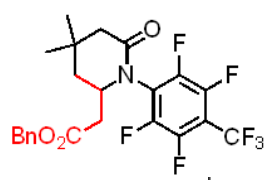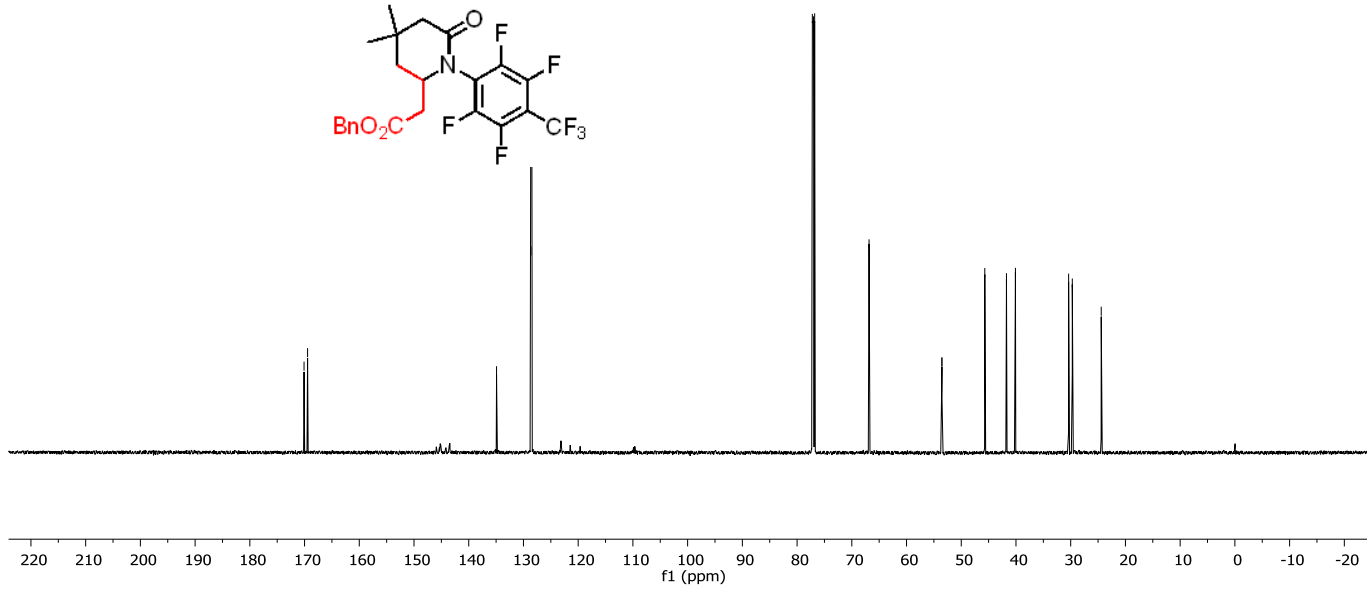

7.269

4.458  
4.443  
4.429  
4.415  
4.401  
4.386

2.561  
2.546  
2.399  
2.393  
2.381  
2.335  
2.327  
2.316  
2.309  
2.298  
2.291  
2.279  
2.273  
2.024  
2.017  
2.011  
2.005  
1.990  
1.983  
1.977  
1.971  
1.568  
1.539  
1.536  
1.506  
1.185  
1.107  
0.960  
0.941  
0.923

0.000

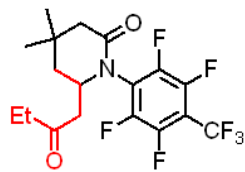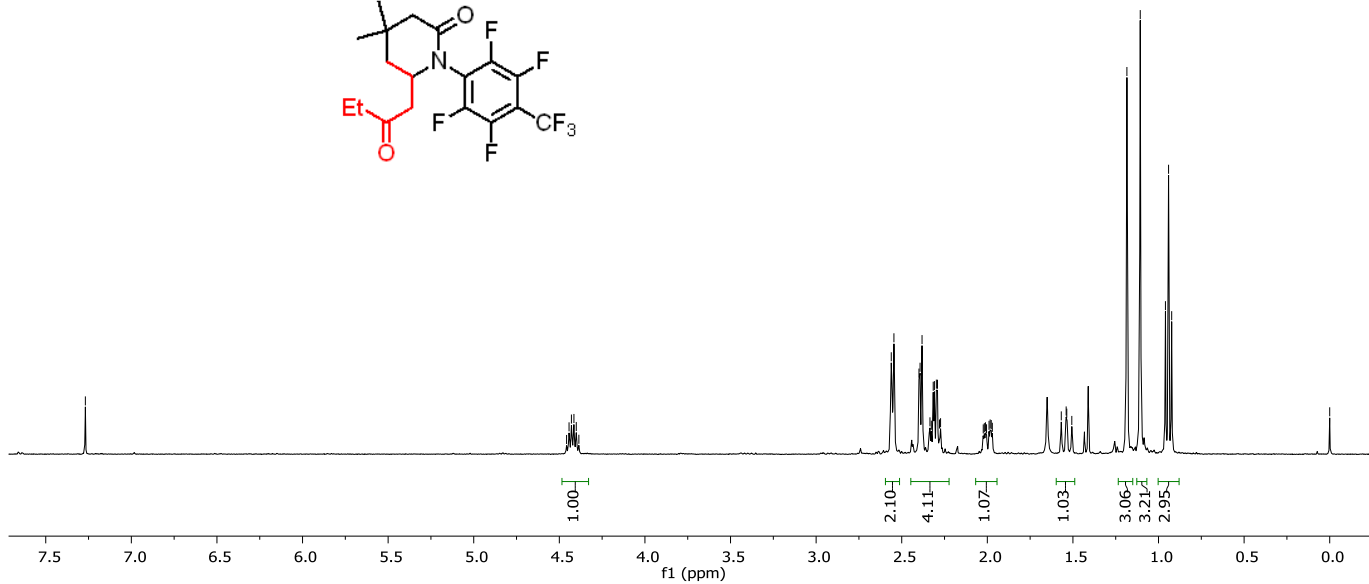

207.178

170.269

77.212 CDCl3  
77.000 CDCl3  
76.789 CDCl3

52.697  
52.679  
47.553  
45.831  
42.145  
36.683  
30.460  
29.804  
24.464

7.244

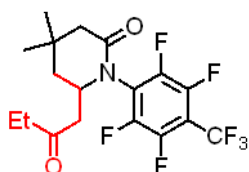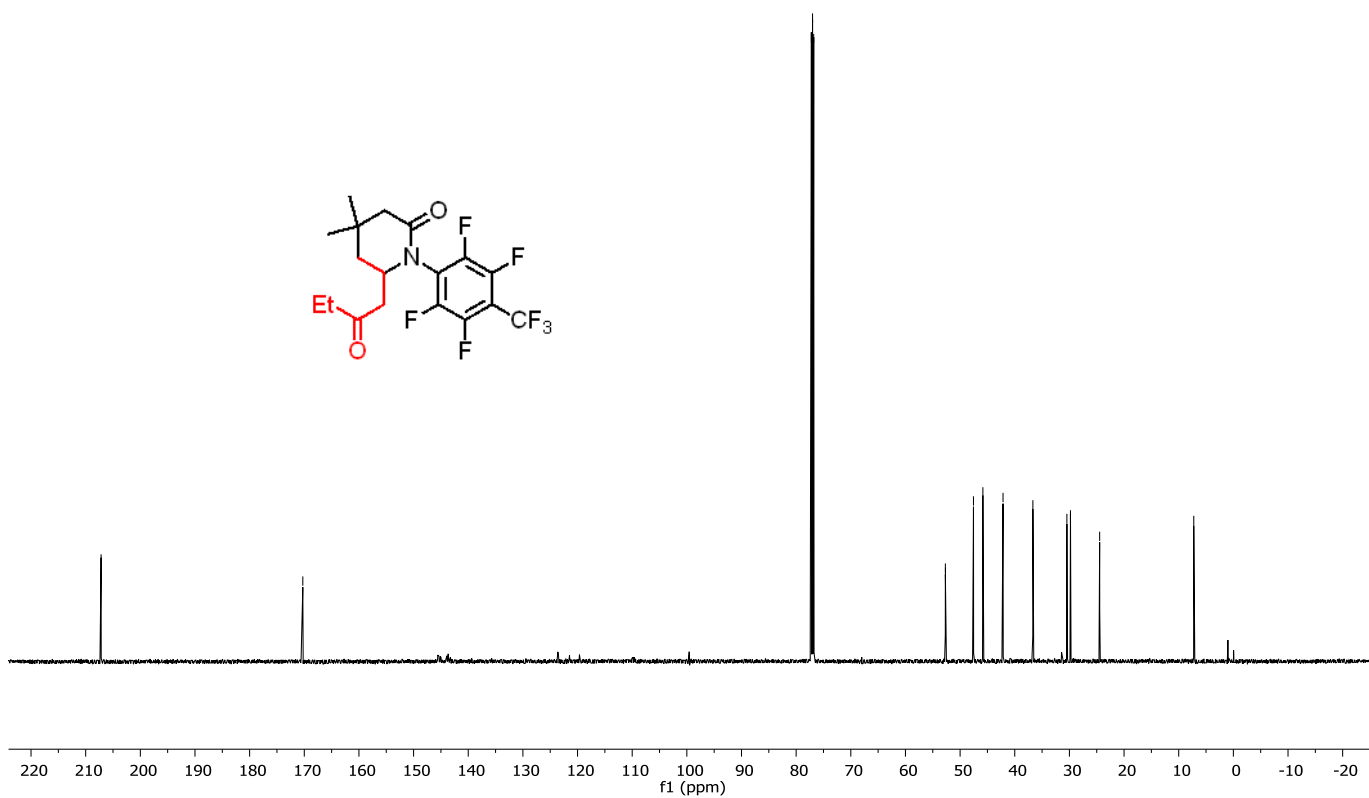

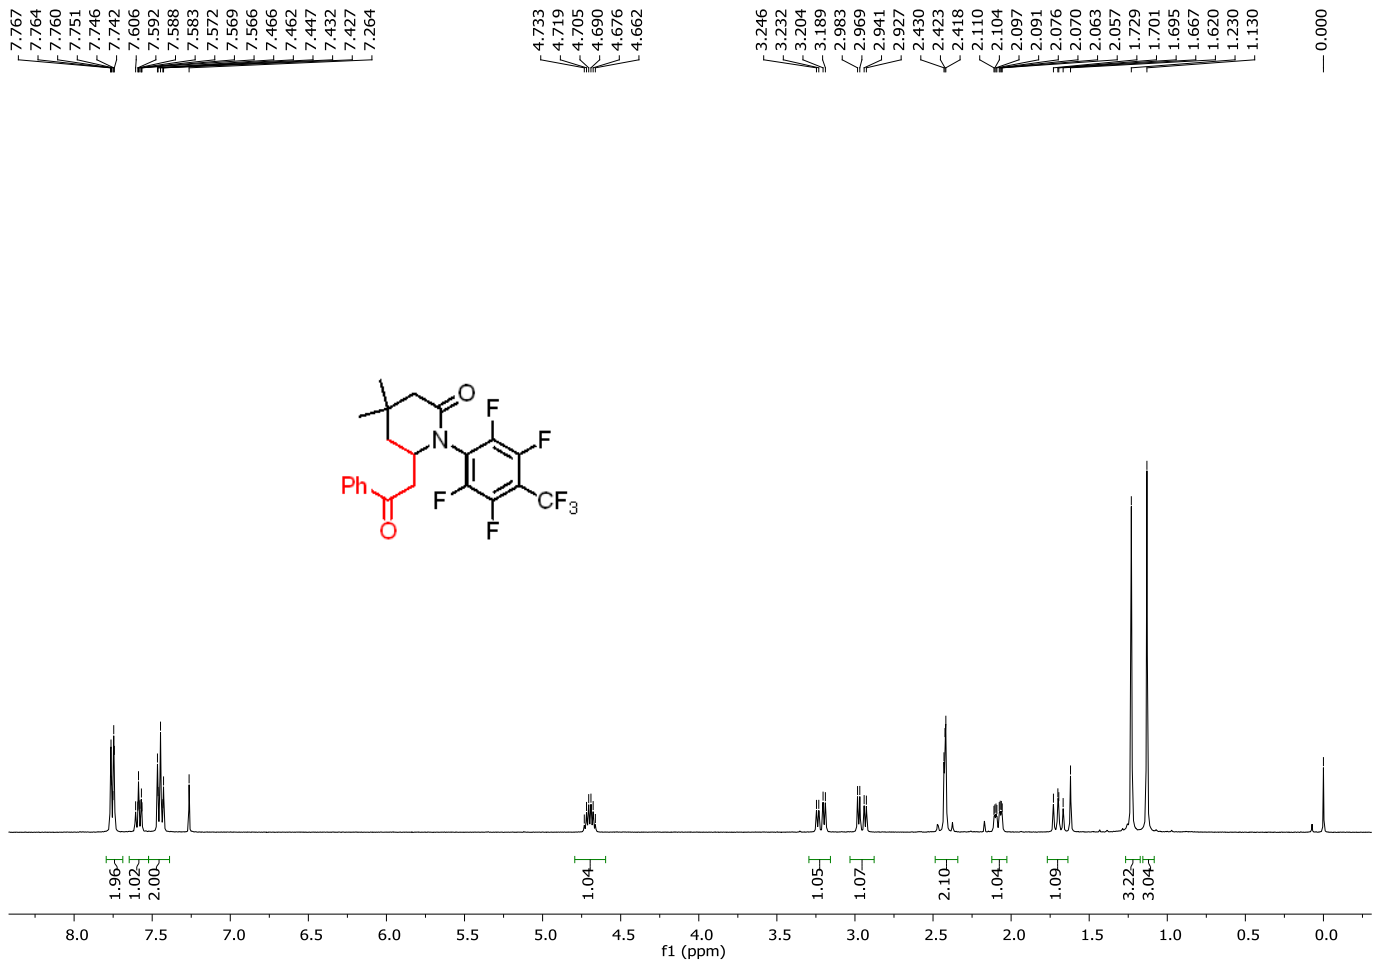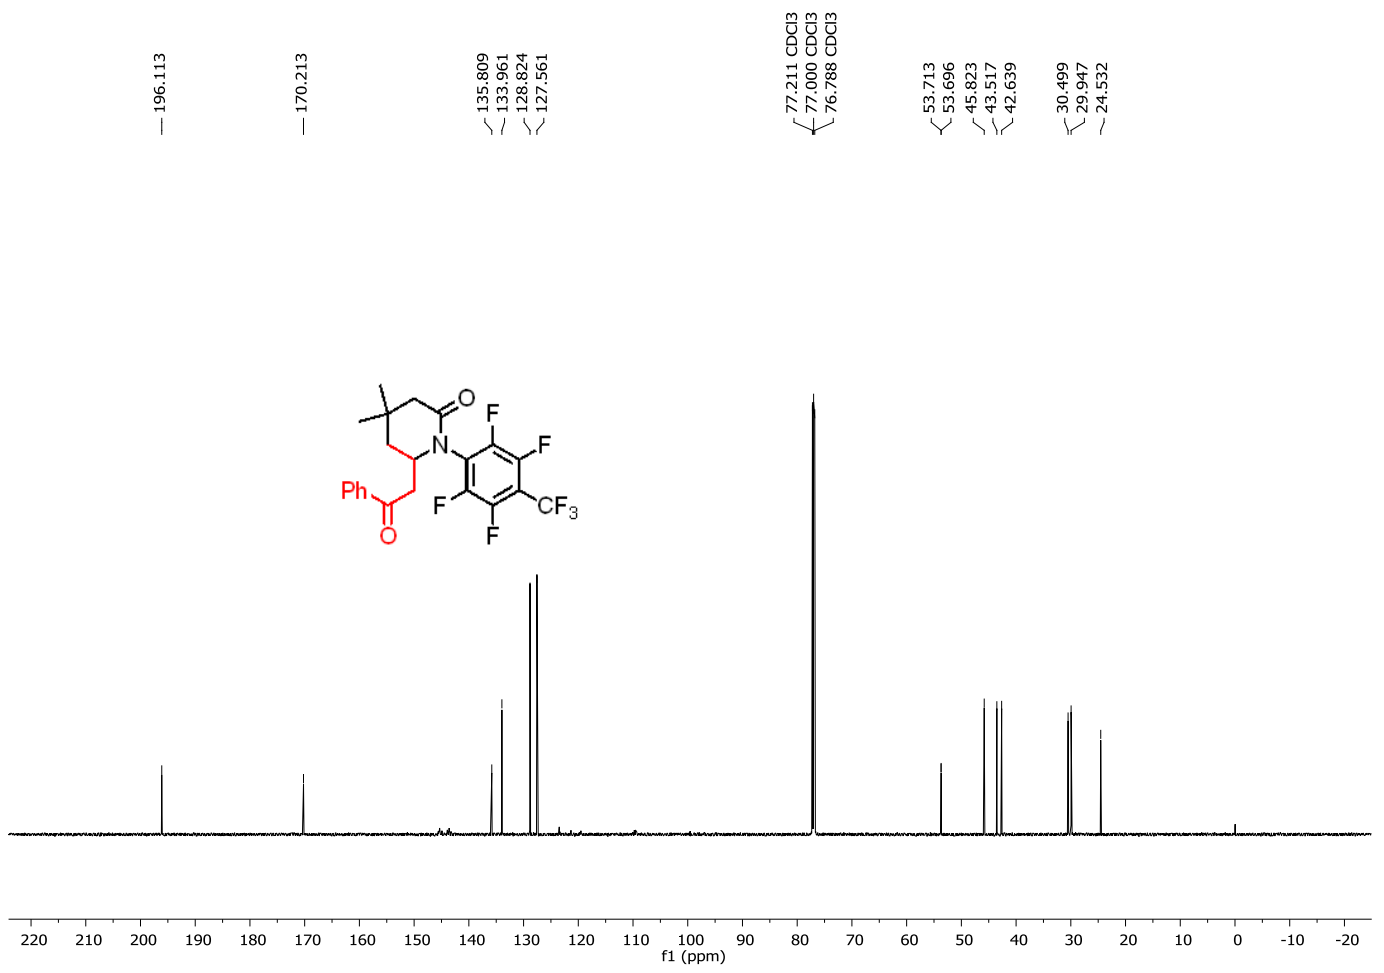



— 7.268

4.201  
4.188  
4.175  
4.161  
4.148  
4.137

2.507  
2.503  
2.496  
2.492  
2.487  
2.463  
2.459  
2.454  
2.110  
2.106  
2.099  
2.094  
2.077  
2.073  
2.063  
2.058  
1.903  
1.872  
1.840  
1.186

— 0.000

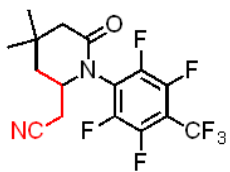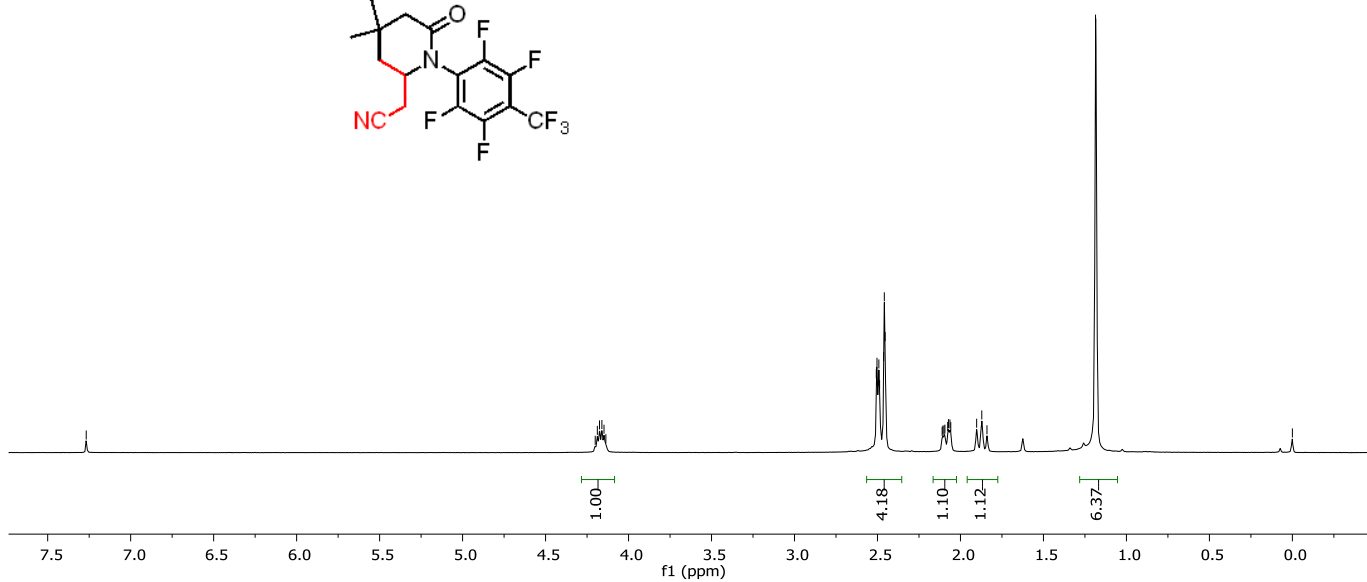

— 169.733

— 115.162

77.211 CDCl3  
76.999 CDCl3  
76.788 CDCl3

52.952  
52.927

45.525  
41.457

30.235  
29.826  
24.296  
24.283

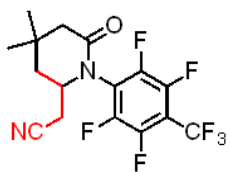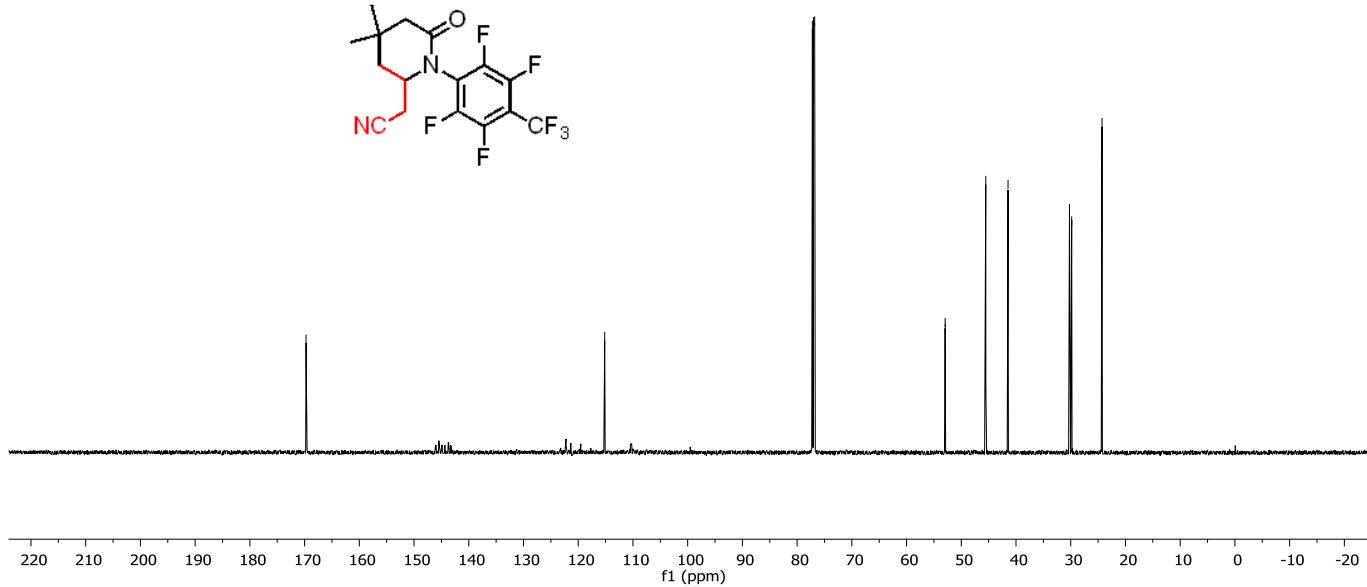

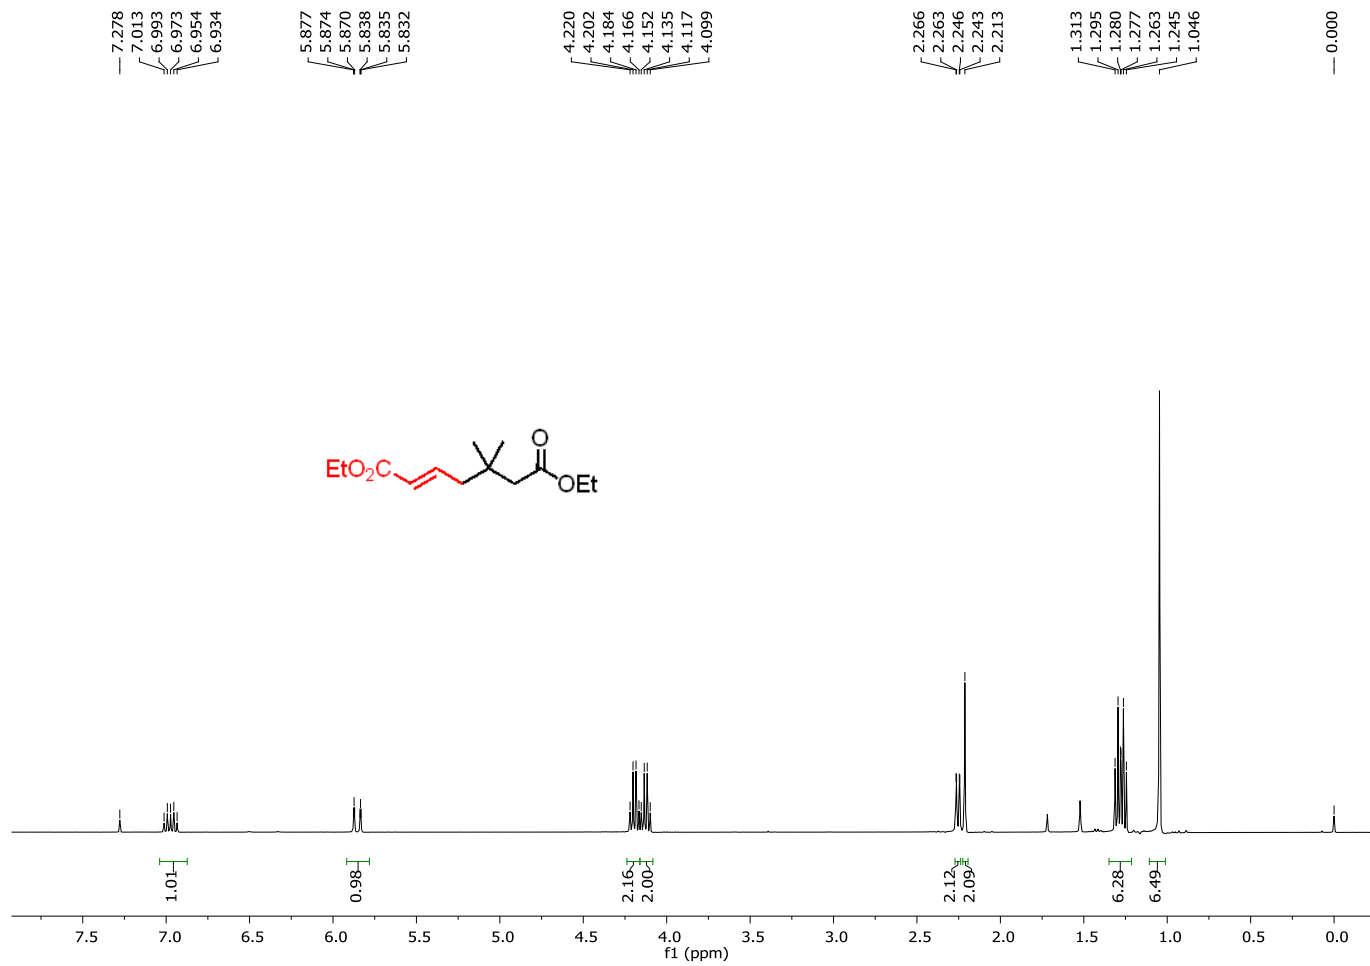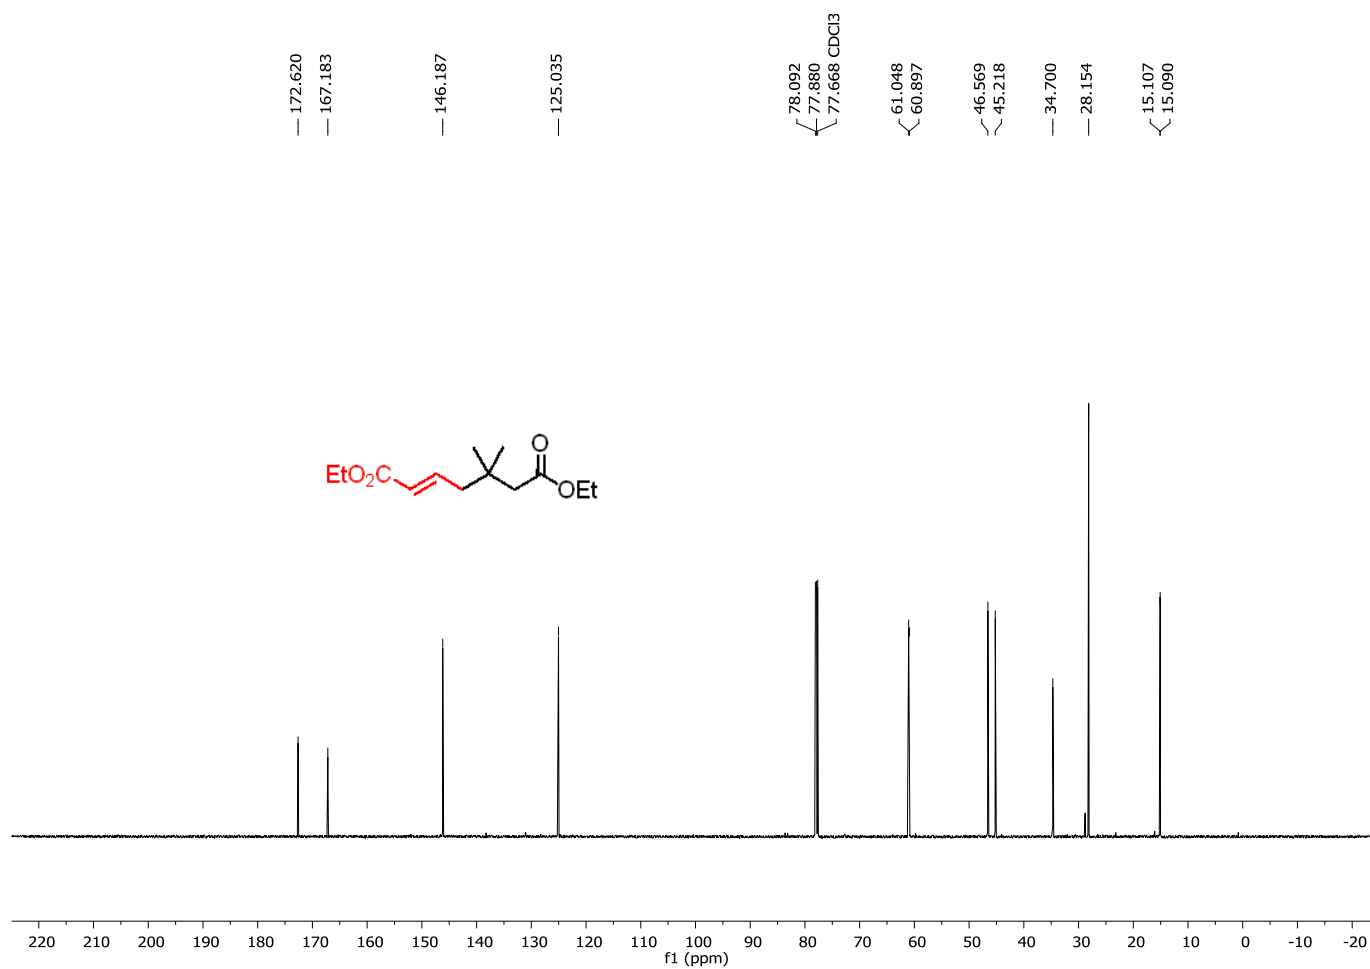

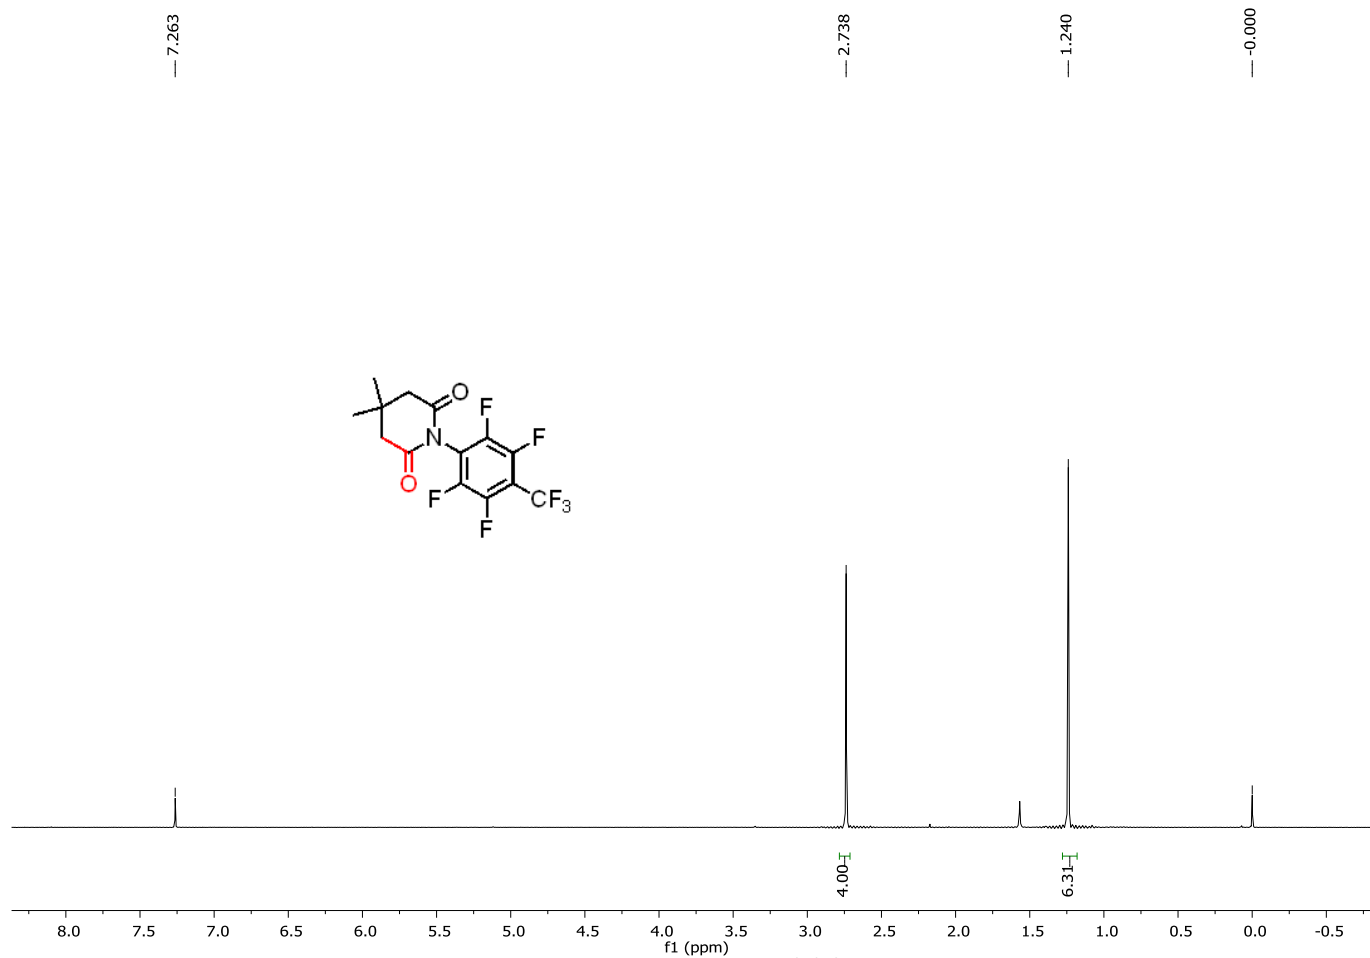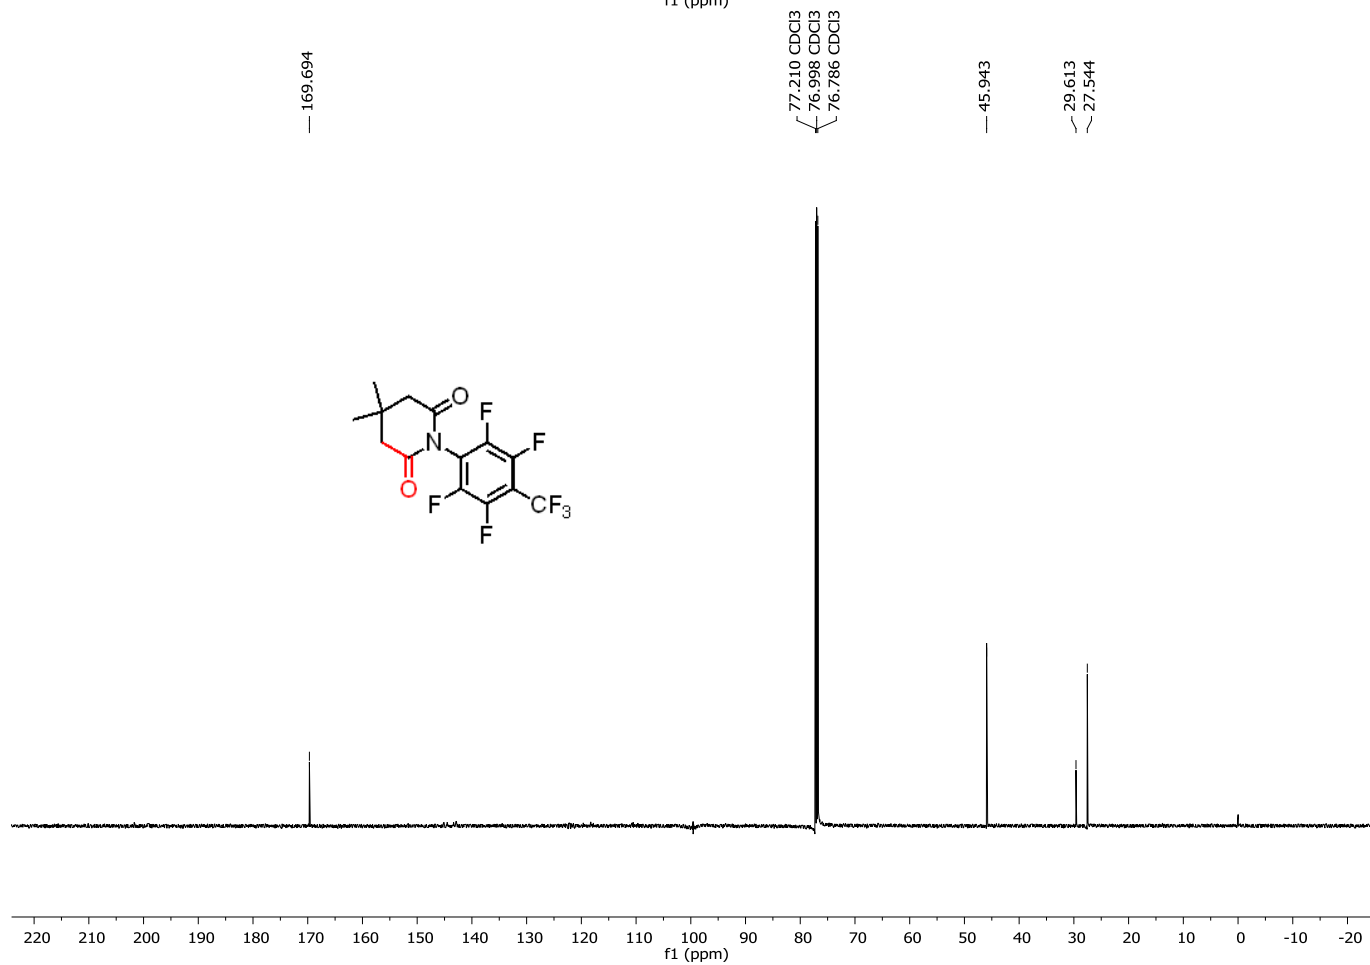

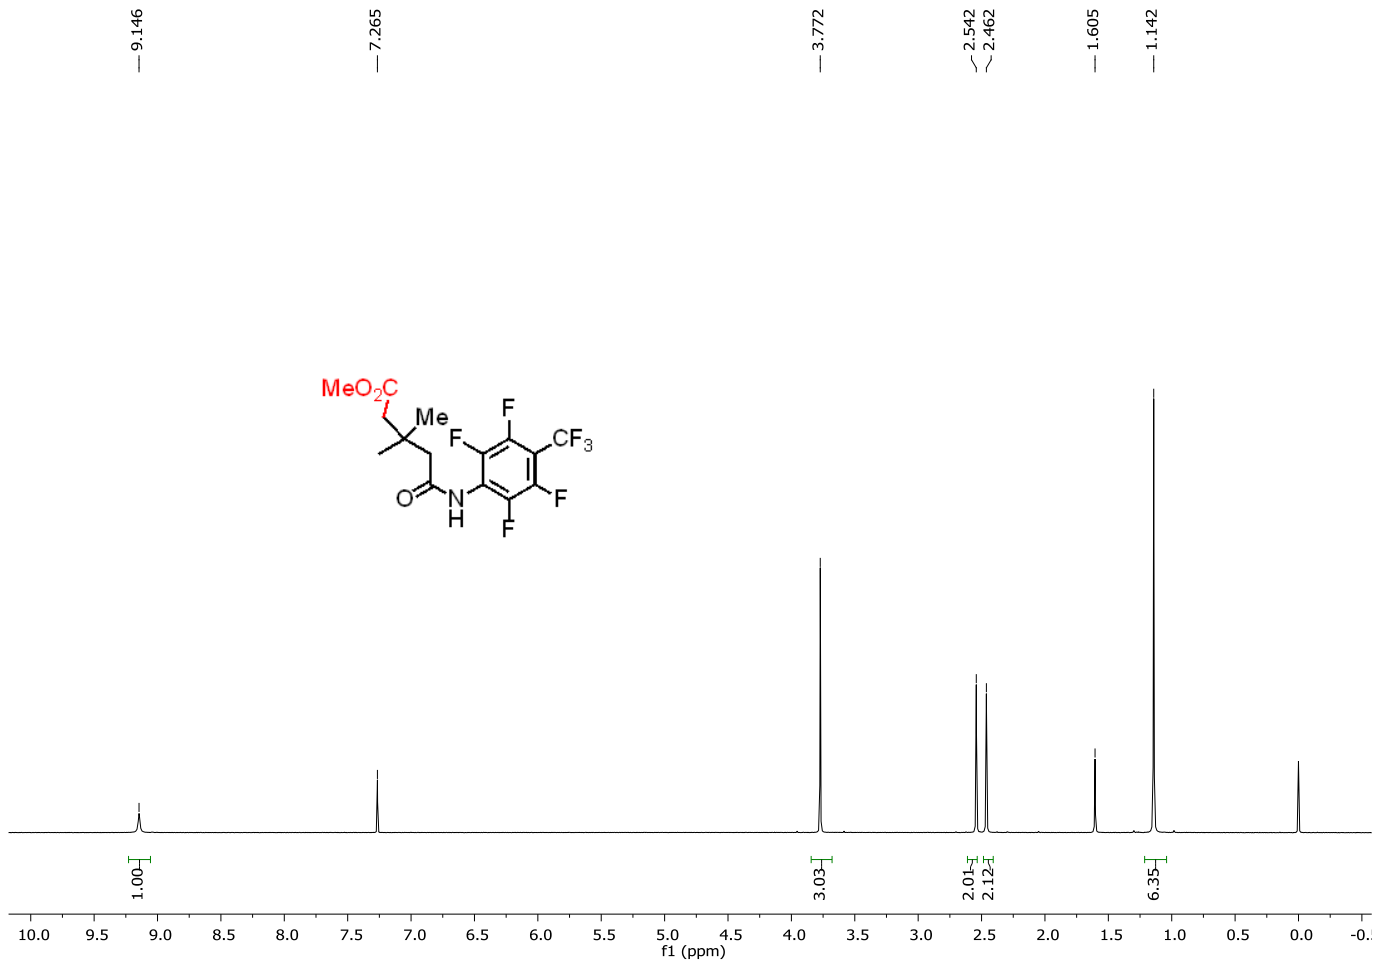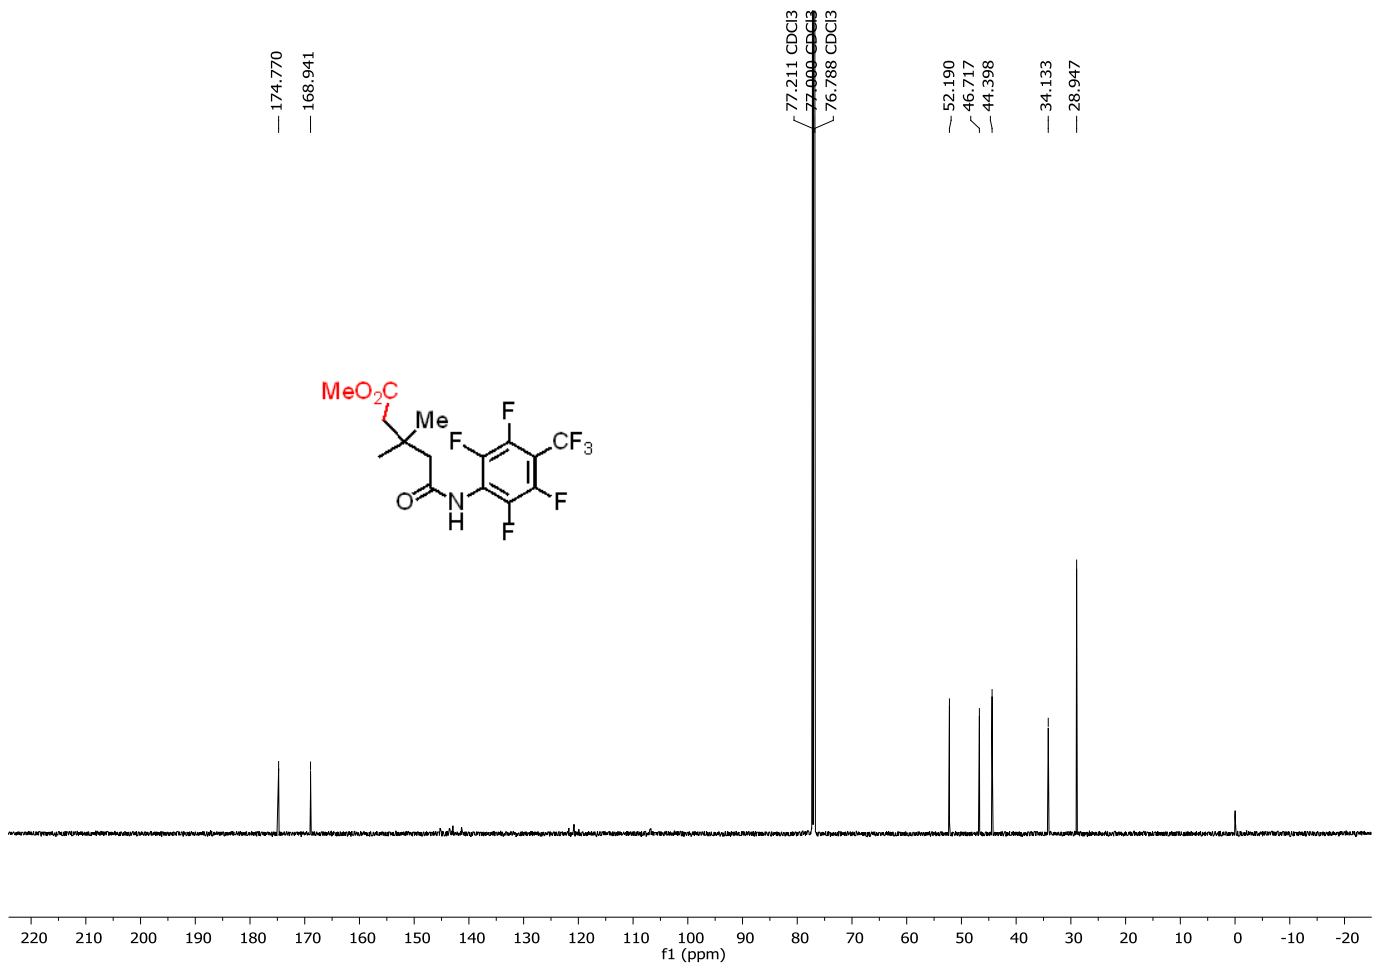

7.269

4.432  
4.418  
4.404  
4.389  
4.383  
4.371  
4.355  
4.341  
4.326  
3.989  
3.720  
3.712  
2.624  
2.563  
2.468  
2.455  
2.449  
2.439  
2.436  
2.407  
2.400  
2.389  
2.385  
2.187  
2.179  
2.174  
1.905  
1.873  
1.842  
1.763  
1.735  
1.728  
1.700  
1.287  
1.222  
1.194  
1.185

0.000

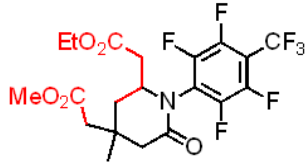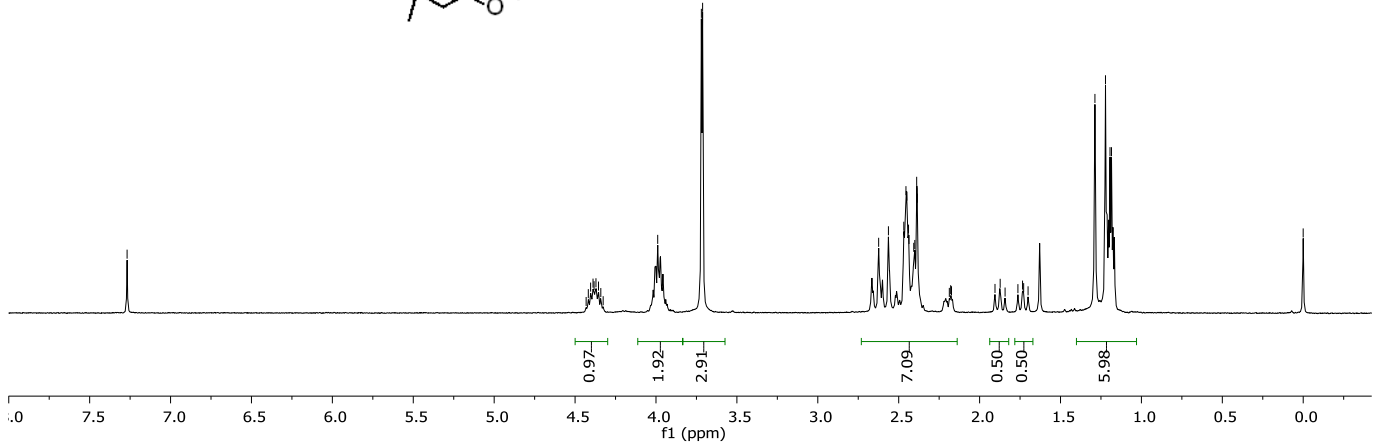

171.158  
170.909  
169.641  
169.467  
169.314  
169.067

77.211  
76.999 CDCl3  
76.788 CDCl3

61.138  
61.120  
53.323  
53.305  
53.108  
53.090  
51.712  
51.664  
46.473  
45.016  
43.739  
40.882  
40.084  
40.064  
39.564  
39.489  
32.237  
32.032  
27.211  
22.482  
13.902  
13.885

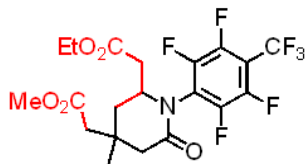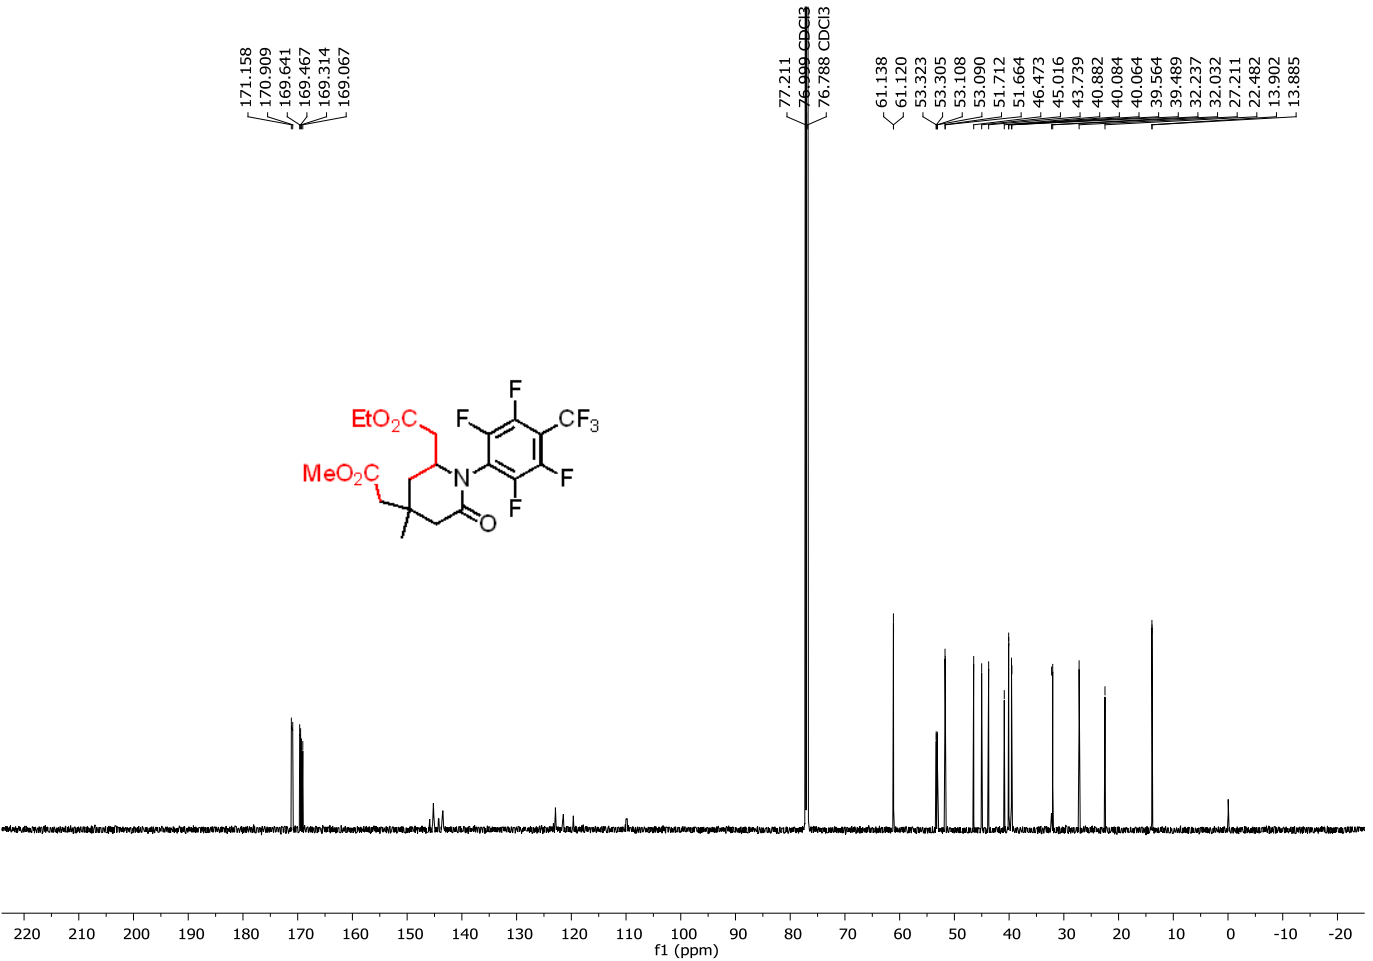

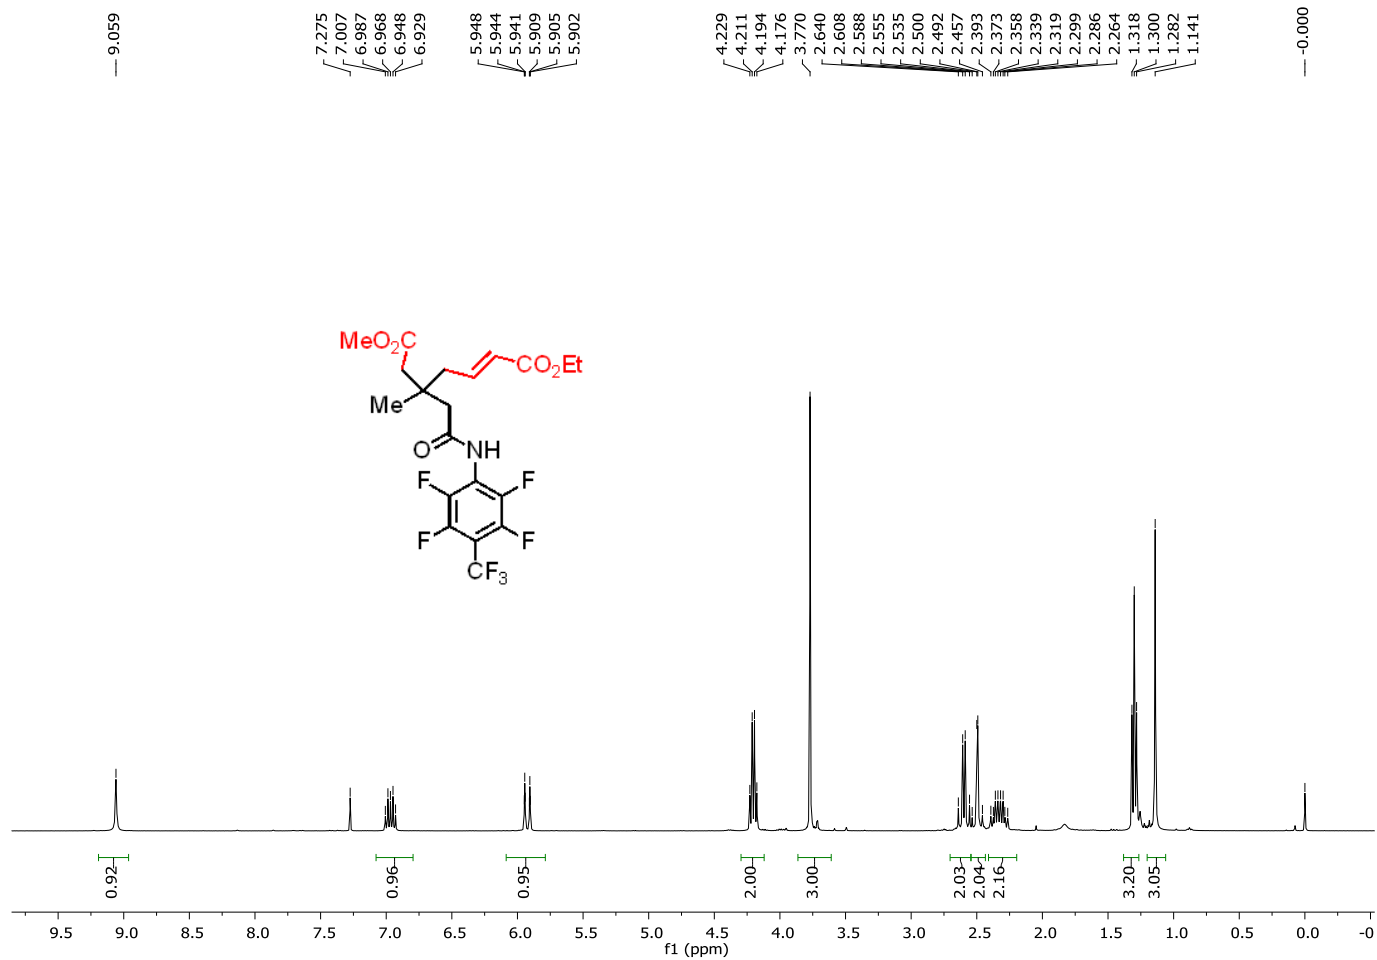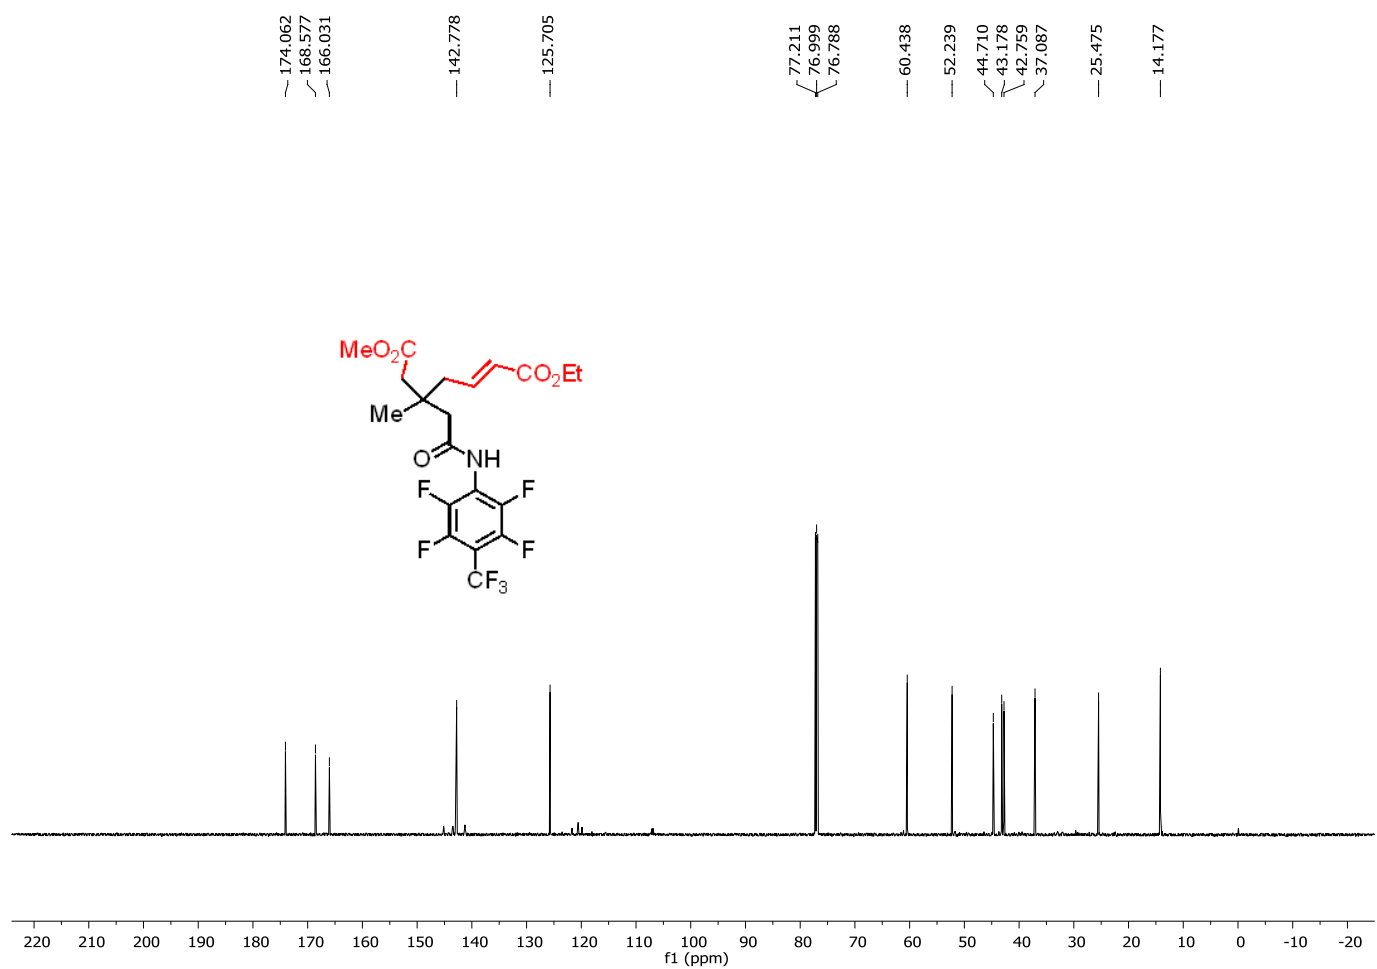

Supplement: ja501689j_si_001.pdf [file ja501689j_si_001.pdf]
